# Supplementary material for: Highly active, chemo- and enantioselective Pt-SPO catalytic systems for the synthesis of aromatic carboxamides
Source: Royal Society of Chemistry journal article supplement (doi:10.1039/c5cy00627a), 2015-01-01
Supplement: c5cy00627a1.pdf [file c5cy00627a1.pdf]

## Highly active, chemo- and enantioselective Pt-SPO catalytic systems for the synthesis of aromatic carboxamides

### Supporting information

#### Content

1. General information on the experimental conditions, chemicals, and instrumentation
2. Experimental procedure of the improved synthesis of the chiral SPO 1
3.  $^{31}\text{P}\{^1\text{H}\}$  and  $^{31}\text{P}$  NMR spectra of SPO 1
4. HPLC analysis of SPO1 isolated by column chromatography
5. Single crystal X-ray analysis of the chiral SPO 1
6. Formation of the *cis*-Pt(1) $_2$ Cl $_2$  in the reaction of Pt(COD) $_2$ Cl $_2$  with two equivalents of 1
7. Formation of the [Pt(1) $_3$ Cl]Cl in the reaction of Pt(COD) $_2$ Cl $_2$  with three equivalents of 1
8. In situ formed Pt(COD)Cl $_2$ /1 catalytic system, effect of the Pt:P ratio on the catalytic activity
9. Solvent optimization for the synthesis of carboxamides using the in situ formed Pt(COD)Cl $_2$ /1 catalytic system
10. Formation of PtH(PR $_2$ OH)(PR $_2$ O--H--OR $_2$ P) (PR $_2$ OH = 1) in the reaction of Pt(PPh $_3$ ) $_4$  with 4 equivalents of 1
11. Selected examples of the catalytic experiments; GC and GC-MS analyses for the hydration of benzonitrile, 4-bromobenzonitrile, 2-bromobenzonitrile and 2-phenyl propionitrile
12. X-ray structures of 4-bromobenzamide (a), 3-bromobenzamide (b) and 2-bromobenzamide (c)
13. Kinetic resolution in the hydration of [1,1'-binaphthalene]-2,2'-dicarbonitrile using the Pt(PPh $_3$ ) $_4$ /1 and Pt(COD)Cl $_2$ /AgNO $_3$ /1 catalytic systems
14. Mass spectra of the [1,1'-binaphthalene]-2,2'-dicarbonitrile (2), 2'-cyano-[1,1'-binaphthalene]-2-carboxamide (3) and [1,1'-binaphthalene]-2,2'-dicarboxamide (4)

15. X-ray structures of the racemic [1,1'-binaphthalene]-2,2'-dicyanide, the enantioenriched [1,1'-binaphthalene]-2,2'-dicyanide (2), and [1,1'-binaphthalene]-2,2'-dicarboxamide (4)

## 1. General information on the experimental conditions, chemicals, and instrumentation

All manipulations in the course of the synthesis of the secondary phosphine-oxide **1** were carried out under argon or nitrogen using Schlenk-line techniques. Solvents were purified, dried and deoxygenated using standard methods. All the achiral nitrile substrates, as well as Pt(COD)Cl<sub>2</sub> and Pt(PPh<sub>3</sub>)<sub>4</sub> were purchased from Aldrich, and used as received. (*rac*)-[1,1'-binaphthalene]-2,2'-dicyanitrile was prepared according to a published method.<sup>i</sup> The synthesis of ligand **1** has been described by us earlier,<sup>ii</sup> here we publish an optimized method, which yields purer crude product, and higher isolated yields. <sup>31</sup>P{<sup>1</sup>H}-NMR, <sup>31</sup>P-NMR, <sup>1</sup>H-NMR, <sup>13</sup>C{<sup>1</sup>H}-NMR-spectra were recorded using Bruker ATM-400 spectrometer operating at 161.98, 161.98, 400.13, 100.61 MHz, respectively. <sup>1</sup>H NMR and <sup>13</sup>C{<sup>1</sup>H} NMR chemical shifts are reported in ppm (δ) relative to tetramethylsilane, referenced to the chemical shift of residual solvents resonances. <sup>31</sup>P{<sup>1</sup>H} and <sup>31</sup>P NMR chemical shifts are reported in ppm (δ) relative to H<sub>3</sub>PO<sub>4</sub>. Coupling constants (*J*) are given in Hz, and the multiplicity of the signals is described as singlet (s), doublet (d), triplet (t), quartet (q) and multiplet (m). Mass spectra were recorded using a Waters LCT Premier spectrometer. Gas chromatography was performed on an Agilent gas chromatograph, using an HP-5 column (30m), 50 °C initial temperature, 325 °C final temperature, 25 °C/min heating rate, 1.5 mL/min gas flow.

## 2. Experimental procedure of the improved synthesis of the chiral SPO 1

4-diethylamino-4,5-dihydro-3H-dinaphtho(2,1-c; 1',2'-e)phosphepine obtained from 2,2'-dimethyl-1,1'-binaphthyl-dilithium·2N,N,N',N'-tetramethylethylenediamine (8.87 g, 16.8 mmol), not purified, was dissolved in 96% EtOH (45 mL). Aqueous HCl solution (17 mL, 6N, 102 mmol) was added at 0 °C external temperature. It was stirred at room temperature overnight.  $^{31}\text{P}\{^1\text{H}\}$ - and  $^{31}\text{P}$ -NMR spectra of the reaction mixture confirmed the formation of the product. All the volatiles were removed in vacuum. The solid residue was taken up in a 1 M HCl : DCM solvent mixture (30 mL / 30 mL). The organic phase was separated, the aqueous phase was washed with DCM (2 x 20 mL). The combined organic phase was washed with 0.1 N HCl solution (30 mL), and water (3-4 x 20 mL), until the aqueous extract was neutral. During the extraction steps the system tends to form an emulsion. The organic phase was dried over  $\text{MgSO}_4$ . The solvent was removed in vacuum. The off-white, foamy crude product (5.79 g) was purified by column chromatography.  $\text{CH}_2\text{Cl}_2$  was used as eluent to separate dimethylbinaphthyl, then  $\text{CH}_2\text{Cl}_2$ :EtOH (9:1) was used to isolate the product. The column was repeated ( $\text{CH}_2\text{Cl}_2$ :EtOH = 9:1, then 95:5) to isolate the product from some mixed fractions of the first column. The product fractions were combined, and all the volatiles were removed in vacuum. Residual EtOH was removed from the product by dissolving it in DCM, removal of the solvent in vacuum, and drying the product in high vacuum. White solid. Overall yield (based on the lithiated dimethyl-binaphthyl): 3.43 g (62%). The product can be recrystallized from hot benzene yielding the title compound as large colorless crystals.<sup>iii</sup>

$^1\text{H}$ -NMR (400 MHz,  $\text{CDCl}_3$ ):  $\delta$  = 2.94-3.14 (m, 2H,  $\text{CH}_2$ ,  $\text{CH}_2'$ ), 3.26-3.47 (m, 2H,  $\text{CH}_2$ ,  $\text{CH}_2'$ ), 7.26 (dd,  $J_{\text{PH}} = 461$  Hz,  $J_{\text{HH}} = 7.9$  Hz, P(O)H), 7.19-7.33 (m, 4H, binaphthyl), 7.45-7.56 (pseudo q, 3H, binaphthyl), 7.66 (d,  $J_{\text{HH}} = 8.2$  Hz, 1H, binaphthyl), 7.92-8.03 (m, 4H, binaphthyl).  $^{31}\text{P}\{^1\text{H}\}$ -NMR (162 MHz,  $\text{CDCl}_3$ ):  $\delta$  = 42.67 (s).  $^{31}\text{P}$ -NMR (162 MHz,  $\text{CDCl}_3$ ):  $\delta$  = 42.67 (dm,  $J_{\text{PH}} = 461$  Hz).

### 3. $^{31}\text{P}\{^1\text{H}\}$ and $^{31}\text{P}$ NMR spectra of SPO 1

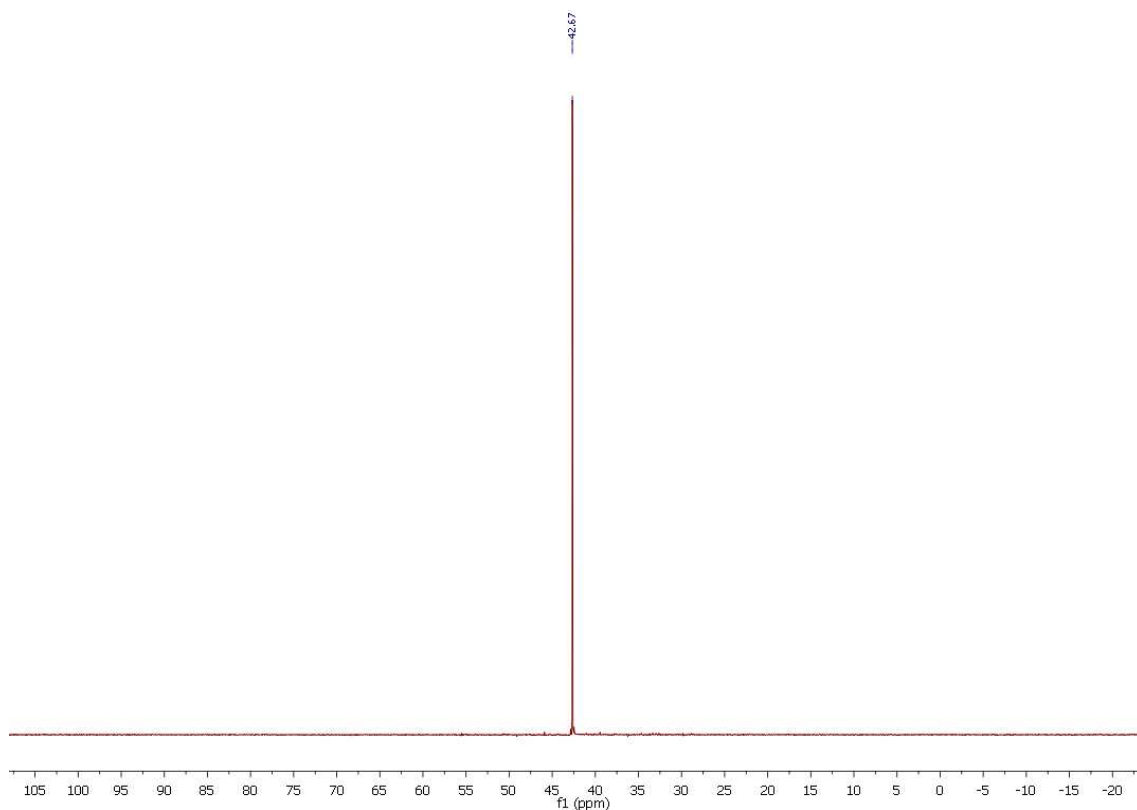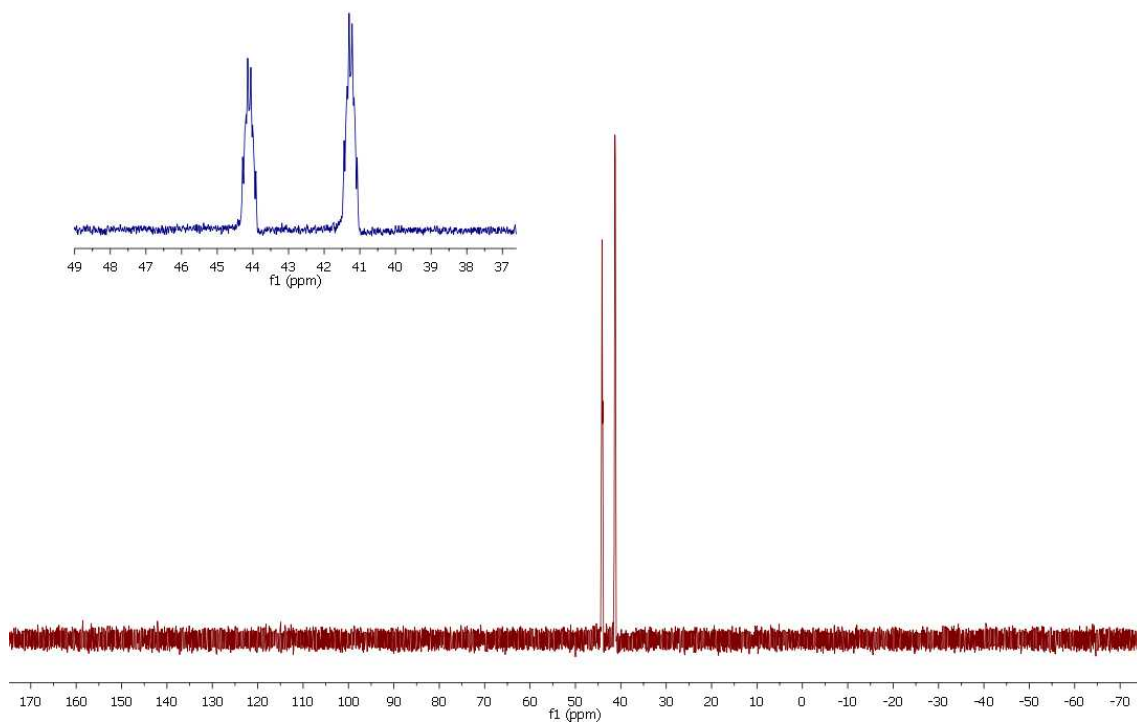

#### 4. HPLC analysis of SPO1 isolated by column chromatography

Data File C:\CHEM32\1\2008\VAN LEEUWEN\HG\HG343-150\HG343-150\_ZX\_H2O-ACN-10-100\_20MIN.D  
 Sample Name: hg343-150

```

=====
Acq. Operator   : ecm
Acq. Instrument : HPLC-1                      Location : Vial 1
Injection Date  : 2/6/2008 3:42:50 PM      Inj Volume : 5 µl

Acq. Method    : C:\CHEM32\1\METHODS\ACN.M
Last changed   : 2/6/2008 3:41:34 PM by ecm
                (modified after loading)
Analysis Method : C:\CHEM32\1\METHODS\ACN.M
Last changed   : 2/6/2008 4:04:37 PM by ecm
                (modified after loading)
Sample Info    : Column: Zorbax 150x4.6 mm, 3.5 µm
                H2O / ACN 90:10
                gradient 10% MeCN up to 100% in 20min
                1 mL/min
                1.5mg/mL (MeOH)
  
```

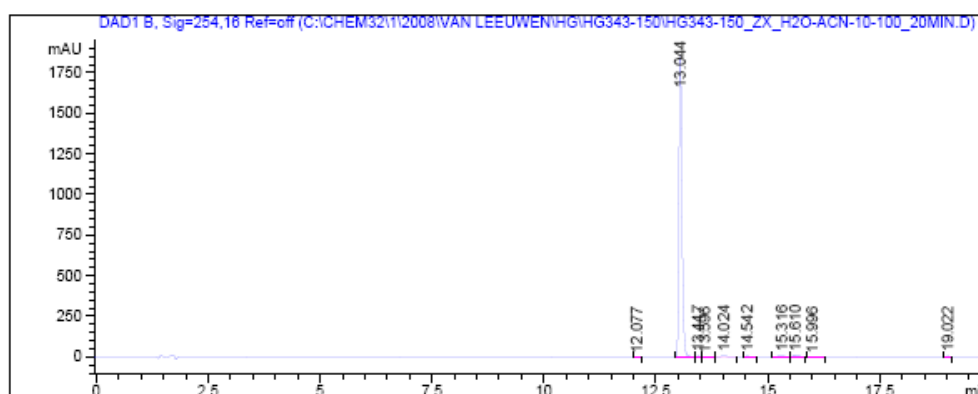

=====  
 Area Percent Report  
 =====

```

Sorted By      : Signal
Multiplier     : 1.0000
Dilution       : 1.0000
Use Multiplier & Dilution Factor with ISTDs
  
```

Signal 1: DAD1 B, Sig=254,16 Ref=off

| Peak # | RetTime [min] | Type | Width [min] | Area [mAU*s] | Height [mAU] | Area %  |
|--------|---------------|------|-------------|--------------|--------------|---------|
| 1      | 12.077        | VV   | 0.0643      | 5.44126      | 1.26108      | 0.0610  |
| 2      | 13.044        | BV   | 0.0726      | 8694.01953   | 1856.09387   | 97.4006 |
| 3      | 13.447        | VV   | 0.0792      | 18.01774     | 3.32347      | 0.2019  |
| 4      | 13.596        | VB   | 0.1350      | 9.53338      | 1.03989      | 0.1068  |
| 5      | 14.024        | BV   | 0.1754      | 44.04807     | 3.68518      | 0.4935  |
| 6      | 14.542        | VB   | 0.1017      | 19.93422     | 2.65118      | 0.2233  |
| 7      | 15.316        | BV   | 0.1396      | 41.08949     | 3.94225      | 0.4603  |
| 8      | 15.610        | VB   | 0.0976      | 76.42979     | 10.92734     | 0.8563  |
| 9      | 15.996        | BB   | 0.0986      | 9.46443      | 1.36967      | 0.1060  |
| 10     | 19.022        | BV   | 0.0787      | 8.06756      | 1.55173      | 0.0904  |

Totals : 8926.04547 1885.84566

=====  
 \*\*\* End of Report \*\*\*

## 5. Single crystal X-ray analysis of the chiral SPO 1

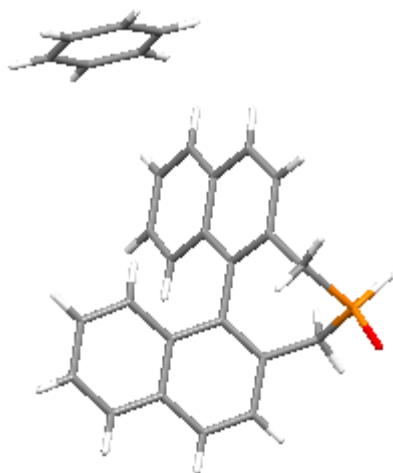

Table 1. Crystal data and structure refinement for **SPO1**.

|                                 |                                        |             |
|---------------------------------|----------------------------------------|-------------|
| Identification code             | hg427150_0m                            |             |
| Empirical formula               | C <sub>28</sub> H <sub>23</sub> O P    |             |
| Formula weight                  | 406.43                                 |             |
| Temperature                     | 100(2)K                                |             |
| Wavelength                      | 0.71073 Å                              |             |
| Crystal system                  | Orthorhombic                           |             |
| Space group                     | P2(1)2(1)2(1)                          |             |
| Unit cell dimensions            | a = 7.9622(4)Å                         | α = 90.00°. |
|                                 | b = 12.3209(7)Å                        | β = 90.00°. |
|                                 | c = 21.0198(11)Å                       | γ = 90.00°. |
| Volume                          | 2062.07(19) Å <sup>3</sup>             |             |
| Z                               | 4                                      |             |
| Density (calculated)            | 1.309 Mg/m <sup>3</sup>                |             |
| Absorption coefficient          | 0.151 mm <sup>-1</sup>                 |             |
| F(000)                          | 856                                    |             |
| Crystal size                    | 0.10 x 0.10 x 0.03 mm <sup>3</sup>     |             |
| Theta range for data collection | 2.74 to 38.03°.                        |             |
| Index ranges                    | -6 ≤ h ≤ 13, -21 ≤ k ≤ 7, -36 ≤ l ≤ 27 |             |
| Reflections collected           | 10895                                  |             |
| Independent reflections         | 9504[R(int) = 0.0286]                  |             |
| Completeness to theta = 38.03°  | 0.984%                                 |             |
| Absorption correction           | Empirical                              |             |

|                                   |                                             |
|-----------------------------------|---------------------------------------------|
| Max. and min. transmission        | 0.9955 and 0.9851                           |
| Refinement method                 | Full-matrix least-squares on F <sup>2</sup> |
| Data / restraints / parameters    | 10895/ 0/ 275                               |
| Goodness-of-fit on F <sup>2</sup> | 1.050                                       |
| Final R indices [I>2sigma(I)]     | R1 = 0.0407, wR2 = 0.1006                   |
| R indices (all data)              | R1 = 0.0500, wR2 = 0.1058                   |
| Largest diff. peak and hole       | 0.521 and -0.252 e.Å <sup>-3</sup>          |

Table 2. Bond lengths [Å] and angles [°] for **SPO1**.

---

Bond lengths----

|         |            |
|---------|------------|
| C1-C2   | 1.5065(14) |
| C1-P1   | 1.8282(9)  |
| C2-C11  | 1.3886(12) |
| C2-C3   | 1.4224(13) |
| C3-C4   | 1.3714(15) |
| C4-C5   | 1.4225(13) |
| C5-C6   | 1.4187(14) |
| C5-C10  | 1.4282(13) |
| C6-C7   | 1.3737(15) |
| C7-C8   | 1.4159(15) |
| C8-C9   | 1.3768(14) |
| C9-C10  | 1.4254(12) |
| C10-C11 | 1.436(13)  |
| C11-C12 | 1.4912(12) |
| C12-C21 | 1.3854(12) |
| C12-C13 | 1.4356(12) |
| C13-C18 | 1.4224(13) |
| C13-C14 | 1.4248(13) |
| C14-C15 | 1.3767(13) |
| C15-C16 | 1.4168(15) |
| C16-C17 | 1.372(15)  |
| C17-C18 | 1.4196(13) |
| C18-C19 | 1.4216(13) |
| C19-C20 | 1.3703(14) |
| C20-C21 | 1.4213(13) |
| C21-C22 | 1.5097(13) |



|         |            |
|---------|------------|
| C22-P1  | 1.8155(9)  |
| O1-P1   | 1.4873(8)  |
| C1A-C6A | 1.3907(16) |
| C1A-C2A | 1.3957(16) |
| C2A-C3A | 1.3874(16) |
| C3A-C4A | 1.3945(15) |
| C4A-C5A | 1.3925(15) |
| C5A-C6A | 1.3898(16) |

Angles-----

|             |            |
|-------------|------------|
| C2-C1-P1    | 110.74(6)  |
| C11-C2-C3   | 119.88(9)  |
| C11-C2-C1   | 120.49(8)  |
| C3-C2-C1    | 119.58(8)  |
| C4-C3-C2    | 120.97(9)  |
| C3-C4-C5    | 120.74(9)  |
| C6-C5-C4    | 121.33(9)  |
| C6-C5-C10   | 119.72(9)  |
| C4-C5-C10   | 118.88(9)  |
| C7-C6-C5    | 120.67(9)  |
| C6-C7-C8    | 119.89(10) |
| C9-C8-C7    | 120.89(9)  |
| C8-C9-C10   | 120.54(9)  |
| C9-C10-C5   | 118.28(8)  |
| C9-C10-C11  | 122.25(8)  |
| C5-C10-C11  | 119.41(8)  |
| C2-C11-C10  | 119.88(8)  |
| C2-C11-C12  | 119.90(8)  |
| C10-C11-C12 | 120.15(7)  |
| C21-C12-C13 | 119.59(8)  |
| C21-C12-C11 | 119.93(8)  |
| C13-C12-C11 | 120.44(7)  |
| C18-C13-C14 | 118.39(8)  |
| C18-C13-C12 | 119.19(8)  |
| C14-C13-C12 | 122.31(8)  |
| C15-C14-C13 | 120.57(9)  |
| C14-C15-C16 | 120.79(9)  |
| C17-C16-C15 | 119.77(9)  |

|             |            |
|-------------|------------|
| C16-C17-C18 | 120.80(9)  |
| C17-C18-C19 | 120.71(9)  |
| C17-C18-C13 | 119.67(8)  |
| C19-C18-C13 | 119.55(8)  |
| C20-C19-C18 | 120.14(8)  |
| C19-C20-C21 | 120.91(8)  |
| C12-C21-C20 | 120.26(8)  |
| C12-C21-C22 | 119.89(8)  |
| C20-C21-C22 | 119.84(8)  |
| C21-C22-P1  | 112.36(6)  |
| O1-P1-C22   | 113.14(5)  |
| O1-P1-C1    | 115.32(5)  |
| C22-P1-C1   | 104.96(4)  |
| C6A-C1A-C2A | 120.06(10) |
| C3A-C2A-C1A | 119.70(10) |
| C2A-C3A-C4A | 120.21(9)  |
| C5A-C4A-C3A | 120.05(10) |
| C6A-C5A-C4A | 119.71(10) |
| C5A-C6A-C1A | 120.25(9)  |

-----

Table 3. Torsion angles [°] for **SPO1**.

|               |            |
|---------------|------------|
| P1-C1-C2-C11  | 71.71(10)  |
| P1-C1-C2-C3   | -105.99(8) |
| C11-C2-C3-C4  | -2.20(14)  |
| C1-C2-C3-C4   | 175.51(9)  |
| C2-C3-C4-C5   | -1.99(14)  |
| C3-C4-C5-C6   | -174.09(9) |
| C3-C4-C5-C10  | 2.94(13)   |
| C4-C5-C6-C7   | 176.82(9)  |
| C10-C5-C6-C7  | -0.18(14)  |
| C5-C6-C7-C8   | 0.02(14)   |
| C6-C7-C8-C9   | 0.61(15)   |
| C7-C8-C9-C10  | -1.08(14)  |
| C8-C9-C10-C5  | 0.90(13)   |
| C8-C9-C10-C11 | -176.54(9) |

|                 |            |
|-----------------|------------|
| C6-C5-C10-C9    | -0.27(12)  |
| C4-C5-C10-C9    | -177.35(8) |
| C6-C5-C10-C11   | 177.24(8)  |
| C4-C5-C10-C11   | 0.17(12)   |
| C3-C2-C11-C10   | 5.29(13)   |
| C1-C2-C11-C10   | -172.40(8) |
| C3-C2-C11-C12   | -177.83(8) |
| C1-C2-C11-C12   | 4.48(12)   |
| C9-C10-C11-C2   | 173.14(8)  |
| C5-C10-C11-C2   | -4.27(12)  |
| C9-C10-C11-C12  | -3.73(12)  |
| C5-C10-C11-C12  | 178.86(8)  |
| C2-C11-C12-C21  | -65.53(11) |
| C10-C11-C12-C21 | 111.35(10) |
| C2-C11-C12-C13  | 112.10(10) |
| C10-C11-C12-C13 | -71.03(11) |
| C21-C12-C13-C18 | -4.16(13)  |
| C11-C12-C13-C18 | 178.21(8)  |
| C21-C12-C13-C14 | 171.91(8)  |
| C11-C12-C13-C14 | -5.73(13)  |
| C18-C13-C14-C15 | 1.56(14)   |
| C12-C13-C14-C15 | -174.53(9) |
| C13-C14-C15-C16 | -1.32(15)  |
| C14-C15-C16-C17 | 0.13(16)   |
| C15-C16-C17-C18 | 0.78(16)   |
| C16-C17-C18-C19 | 176.31(10) |
| C16-C17-C18-C13 | -0.50(15)  |
| C14-C13-C18-C17 | -0.66(13)  |
| C12-C13-C18-C17 | 175.55(9)  |
| C14-C13-C18-C19 | -177.51(8) |
| C12-C13-C18-C19 | -1.29(13)  |
| C17-C18-C19-C20 | -171.79(9) |
| C13-C18-C19-C20 | 5.02(14)   |
| C18-C19-C20-C21 | -3.32(14)  |
| C13-C12-C21-C20 | 5.95(13)   |
| C11-C12-C21-C20 | -176.41(8) |
| C13-C12-C21-C22 | -173.02(8) |
| C11-C12-C21-C22 | 4.63(13)   |

|                 |            |
|-----------------|------------|
| C19-C20-C21-C12 | -2.24(14)  |
| C19-C20-C21-C22 | 176.73(9)  |
| C12-C21-C22-P1  | 71.08(10)  |
| C20-C21-C22-P1  | -107.89(8) |
| C21-C22-P1-O1   | -168.56(7) |
| C21-C22-P1-C1   | -42.01(8)  |
| C2-C1-P1-O1     | 81.62(8)   |
| C2-C1-P1-C22    | -43.58(8)  |
| C6A-C1A-C2A-C3A | 0.93(17)   |
| C1A-C2A-C3A-C4A | -0.75(16)  |
| C2A-C3A-C4A-C5A | -0.46(16)  |
| C3A-C4A-C5A-C6A | 1.50(15)   |
| C4A-C5A-C6A-C1A | -1.33(15)  |
| C2A-C1A-C6A-C5A | 0.11(16)   |

---

6. Formation of the *cis*-Pt(1)<sub>2</sub>Cl<sub>2</sub> in the reaction of Pt(COD)<sub>2</sub>Cl<sub>2</sub> with two equivalents of 1

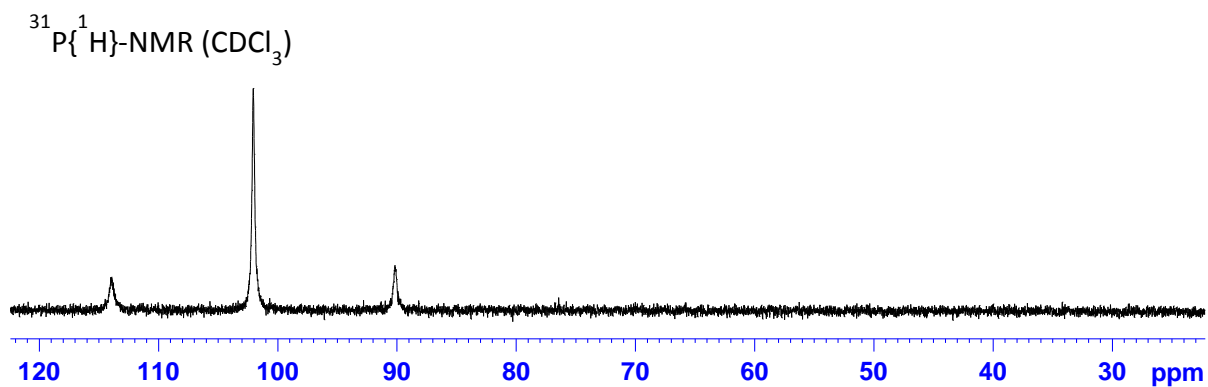

7. Formation of the [Pt(1)<sub>3</sub>Cl]Cl in the reaction of Pt(COD)<sub>2</sub>Cl<sub>2</sub> with three equivalents of 1

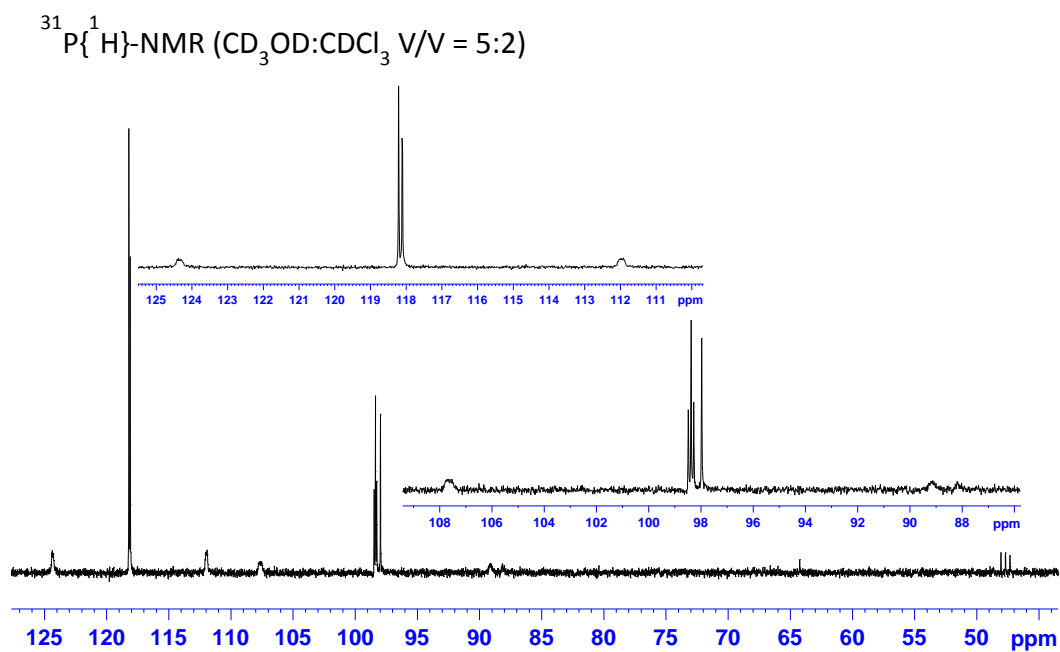

## 8. In situ formed Pt(COD)Cl<sub>2</sub>/1 catalytic system, effect of the Pt:P ratio on the catalytic activity

Pt(COD)Cl<sub>2</sub> (7.5 mg, 0.02 mmol), SPO 1 (13.8 mg, 0.042 mmol / 20.7 mg, 0.063 mmol / 27.6 mg / 0.084 mmol), and 4-bromo-benzonitrile (182 mg, 1 mmol) were subsequently transferred into a 14 mL screw-cap vials, supplied with magnetic stir bars. The vials were purged with argon via the septum of the cap, and then isopropanol (6 mL) was added. Each vial was placed into an oil bath heated at 80 °C. After a few minutes water (1 mL) was added, the septum of the cap was sealed with clay and parafilm, and the reaction mixtures were stirred for 10 hours.

### Test reaction:

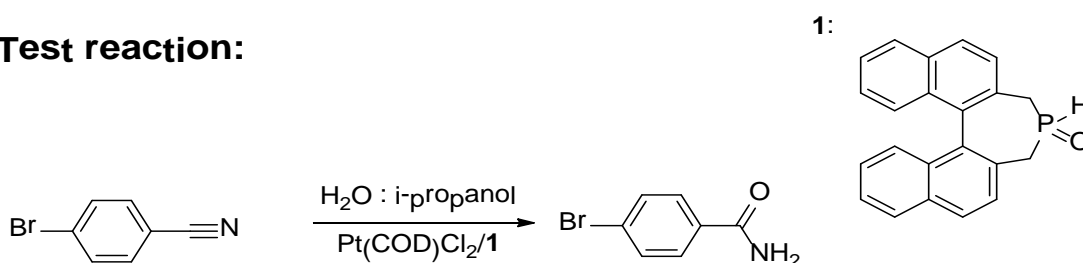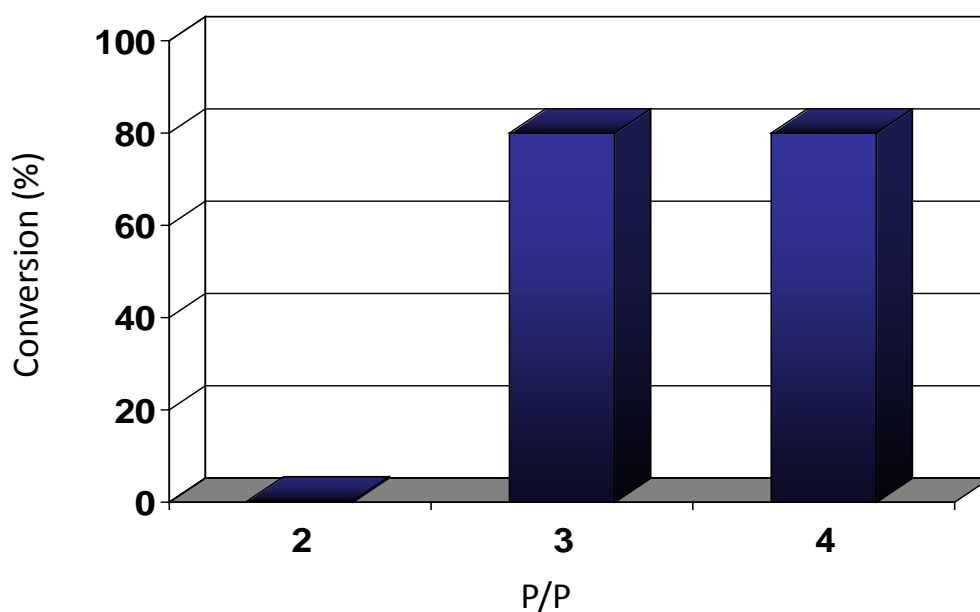

General conditions: 1 mol% Pt(COD)Cl<sub>2</sub>, 2-4 P/Pt ratio, 1 mmol nitrile, 6 mL of *i*-propanol, 1 mL of H<sub>2</sub>O, 80 °C, 10 hours.

**Method** Column: DB-5 30m, ID 0.25mm, 0.25µm  
conc: ? mg/mL (THF)  
Inj vol: 0.2µL  
split 50:1  
Tinj/aux: 260°C  
He flow: 1.5 mL/min  
oven: 50°C up to 325°C (25°C/min)

**Chromatogram**

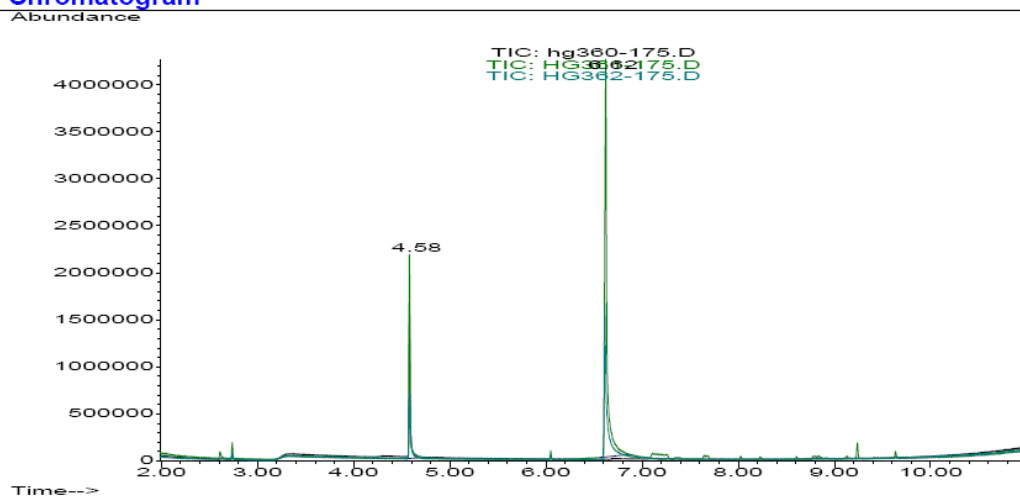

**Spectra**

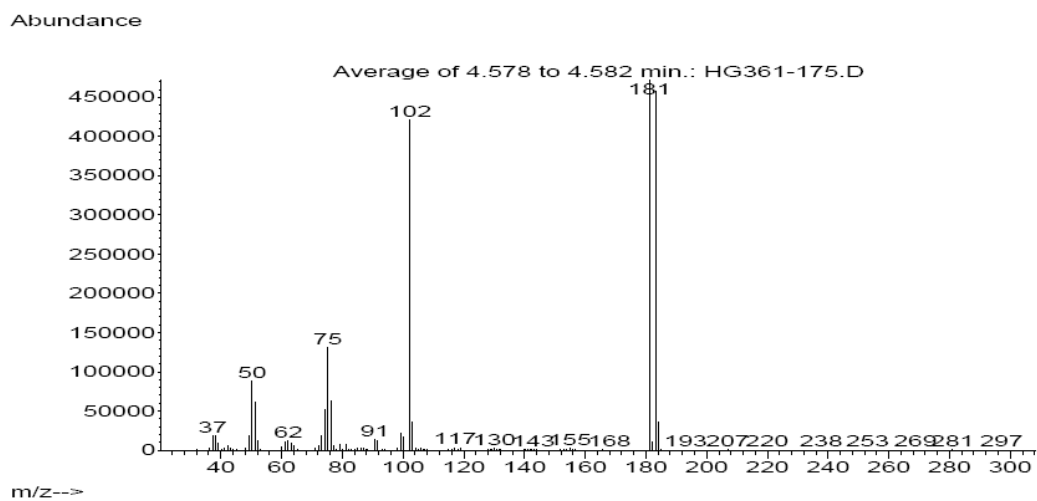

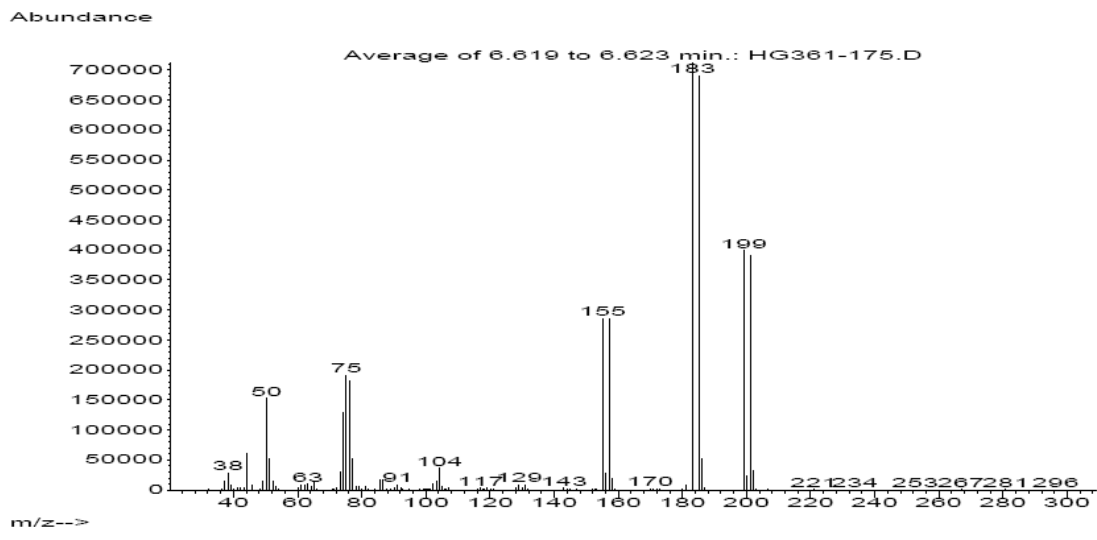

| TIC         | Retention Time (min) | Area     |
|-------------|----------------------|----------|
| hg360-175.D | 4.581                | 15997000 |
| HG361-175.D | 4.580                | 19307604 |
|             | 6.622                | 74416377 |
| hg362-175.D | 4.582                | 8249815  |
|             | 6.614                | 32111442 |



## 9. Solvent optimization for the synthesis of carboxamides using the in situ formed Pt(COD)Cl<sub>2</sub>/1 catalytic system

Pt(COD)Cl<sub>2</sub> (3.74 mg, 0.01 mmol), SPO 1 (11.5 mg, 0.035 mmol), and 4-bromo-benzonitrile (91 mg, 0.5 mmol) were subsequently transferred into a 14 mL screw-cap vial, supplied with magnetic stir bar. The vial was carefully purged with argon via the septum of the cap, and then the appropriate solvent (3 mL) was added. Each vial was placed into an oil bath heated at 80 °C. After a few minutes water (0.6 mL) was added, the septum of the cap was sealed with clay, and the reaction mixtures were stirred for 24 hours. Analytical samples were taken and analysed at 2 and at 24 hours.

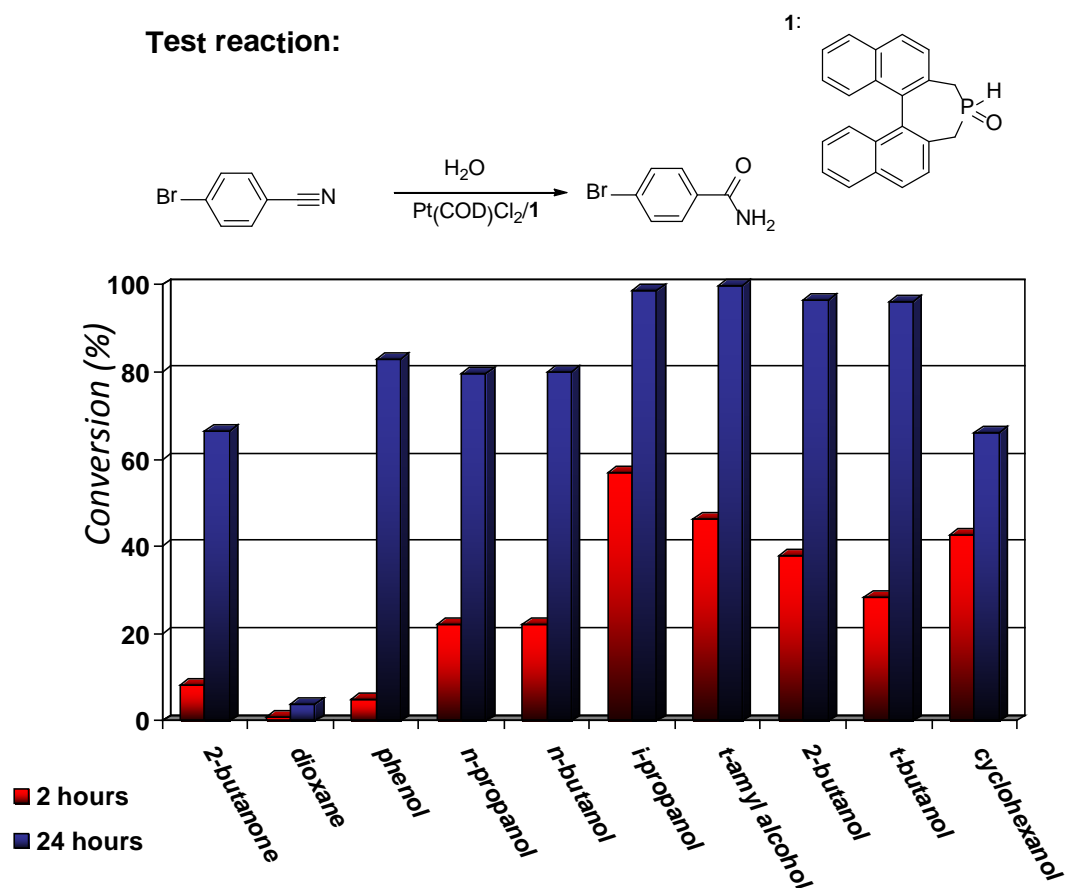

General conditions: 2 mol% Pt(COD)Cl<sub>2</sub>, 3.5 SPO:Pt ratio, 3 mL of solvent, 0.6 mL of H<sub>2</sub>O, 80 °C. Chemoselectivity: 100% in each case.

10. Formation of  $\text{PtH}(\text{PR}_2\text{OH})(\text{PR}_2\text{O--H--OR}_2\text{P})$  ( $\text{PR}_2\text{OH} = \mathbf{1}$ ) in the reaction of  $\text{Pt}(\text{PPh}_3)_4$  with 4 equivalents of  $\mathbf{1}$ \*

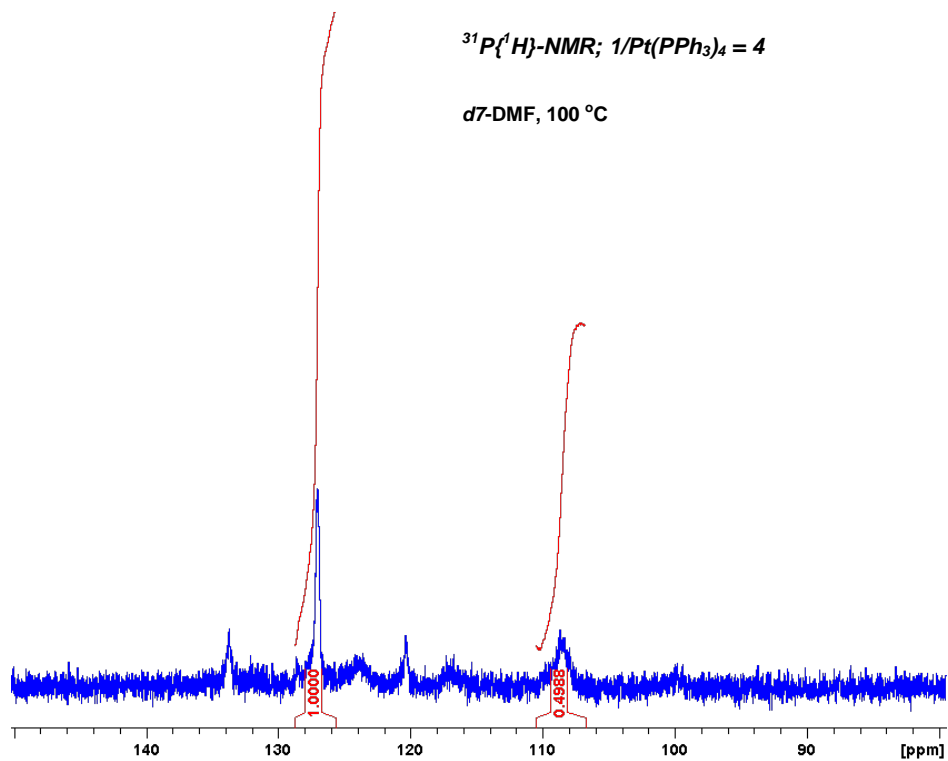

$^1\text{H}$ -NMR, hydride range;  $1/\text{Pt}(\text{PPh}_3)_4 = 4$   
 $d_7$ -DMF, 100 °C

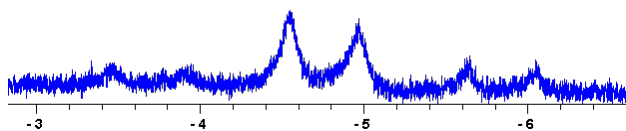

\*The experiment has also been carried out at a  $1/\text{Pt}(\text{PPh}_3)_4$  ratio 3. The formation of the same complex,  $\text{PtH}(\text{PR}_2\text{OH})(\text{PR}_2\text{O--H--OR}_2\text{P})$  ( $\text{PR}_2\text{OH} = \mathbf{1}$ ), as only product was observed.

10. Selected examples of the catalytic experiments; GC and GC-MS analyses for the hydration of benzonitrile into benzamide (a), 4-bromobenzonitrile into 4-bromobenzamide (c), 2-bromobenzonitrile into 2-bromobenzamide (e), and 2-phenylacetonitrile into 2-phenylacetamide (j)

### BENZONITRILE

GC analysis of the benzonitrile substrate

RT in THF: 3.772 min

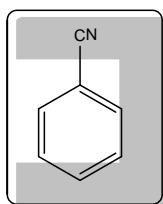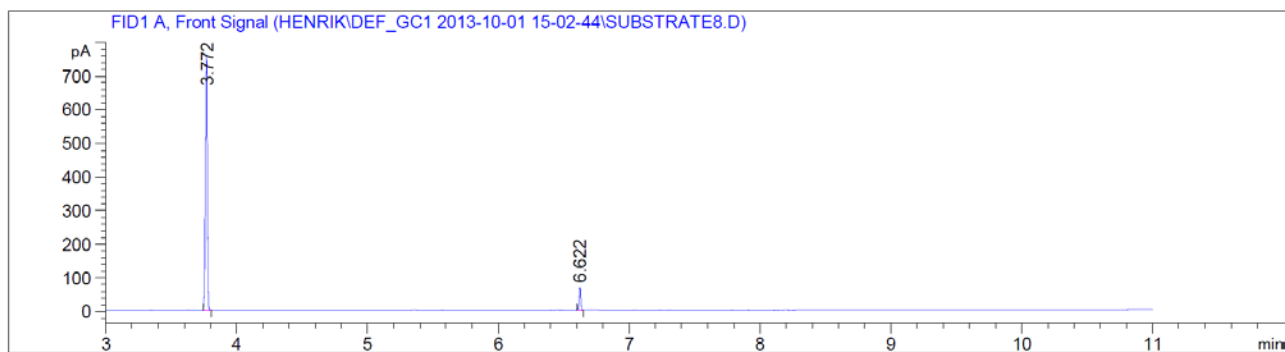



## GC analysis of the reaction mixtures of the catalytic reactions

Catalytic hydration of benzonitrile into benzamide (a) with Pt(COD)Cl<sub>2</sub>/1, reaction time 2h

Yield: 16%.

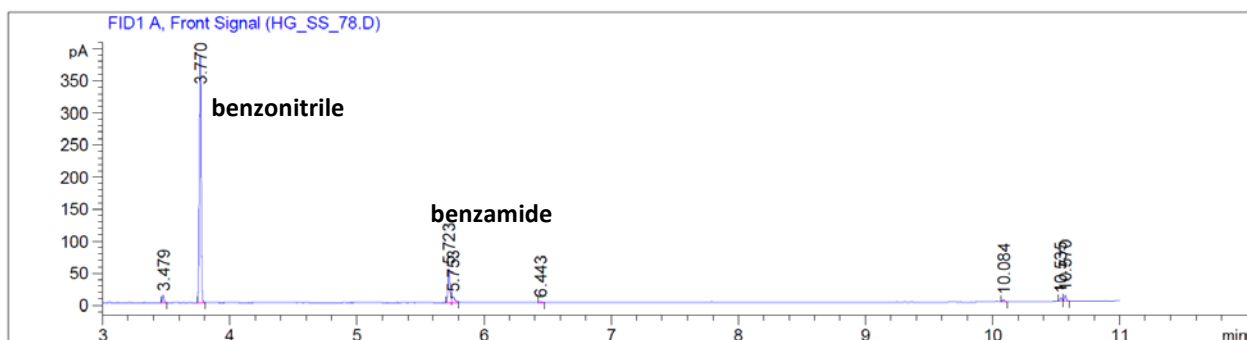

Catalytic hydration of benzonitrile into benzamide (a) with Pt(COD)Cl<sub>2</sub>/1, reaction time 24h

Yield: 95%.

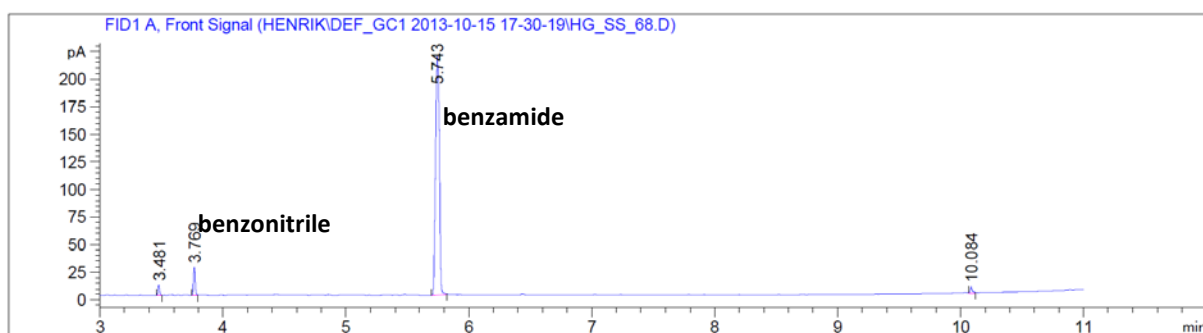

Catalytic hydration of benzonitrile into benzamide (a) with Pt(PPh<sub>3</sub>)<sub>4</sub>/1, reaction time 1h

Yield: >99%.

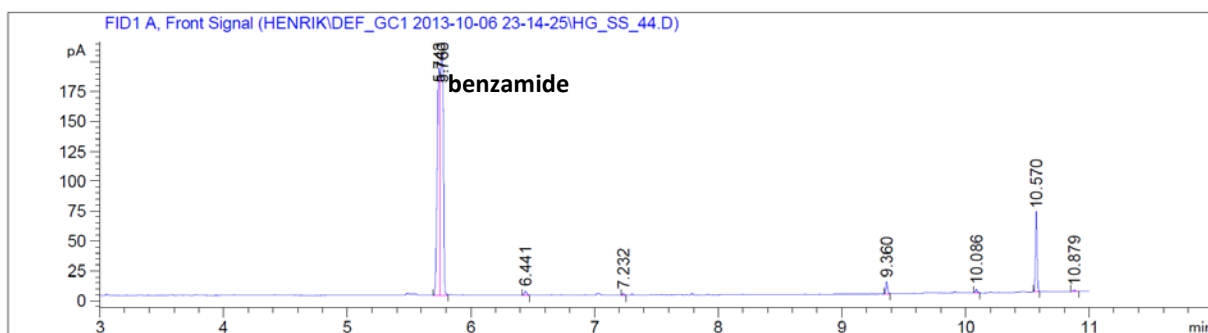

Catalytic hydration of benzonitrile into benzamide (**a**) with Pt(COD)Cl<sub>2</sub>/AgNO<sub>3</sub>/**1** reaction time 1h

Yield: >99%.

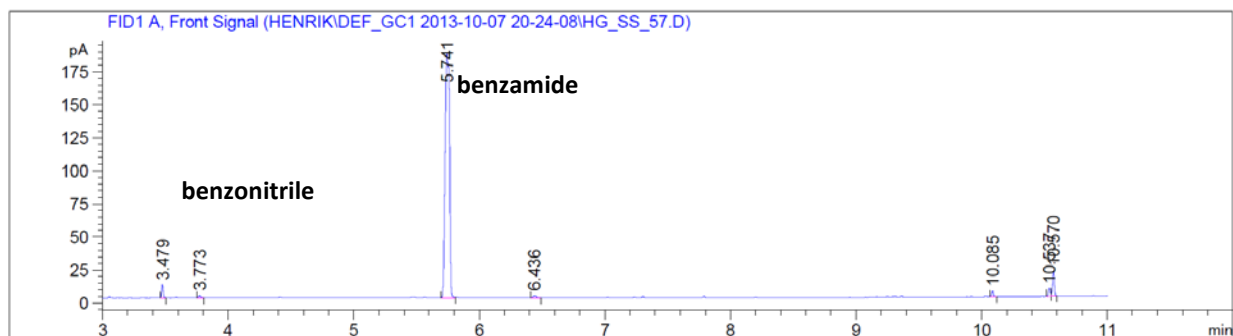

## Isolation of benzamide (a) (Scheme 4, Pt(COD)Cl<sub>2</sub>/AgNO<sub>3</sub>/1 system)

The product was isolated on a chromatotron (centrifugal thin-layer chromatography) using a DCM:EtOH eluent mixture (v/v 10/1). Yield: 66 mg (quantitative). CAS: 55-21-0.

### Sample HG-SS-57

HP-5MS, 30m x 0.25mm x 0.25µm

Tinj-aux: 280°C

1.5mL/min

Split 30:1 (1µl)

50°C-325°C(10')/20°Cmin-1

Sample as received

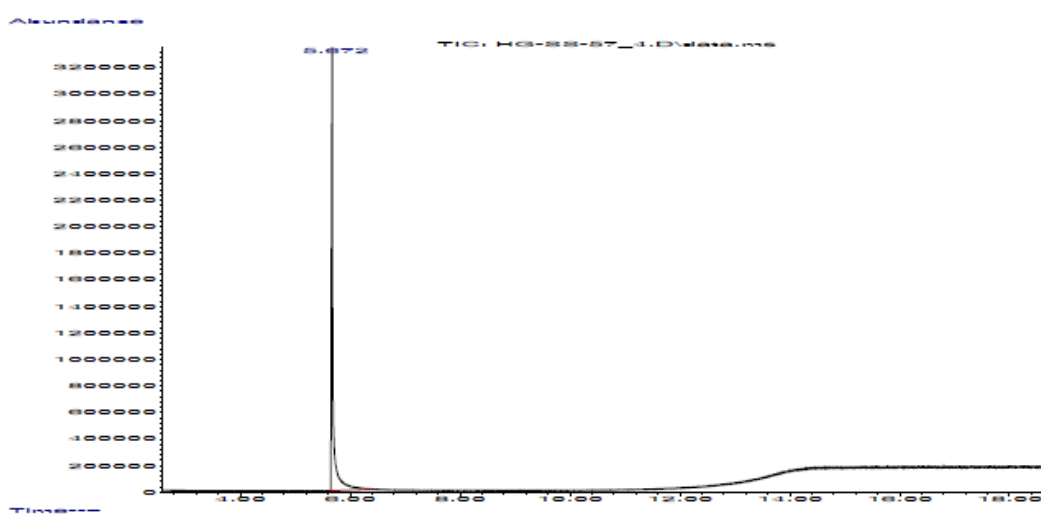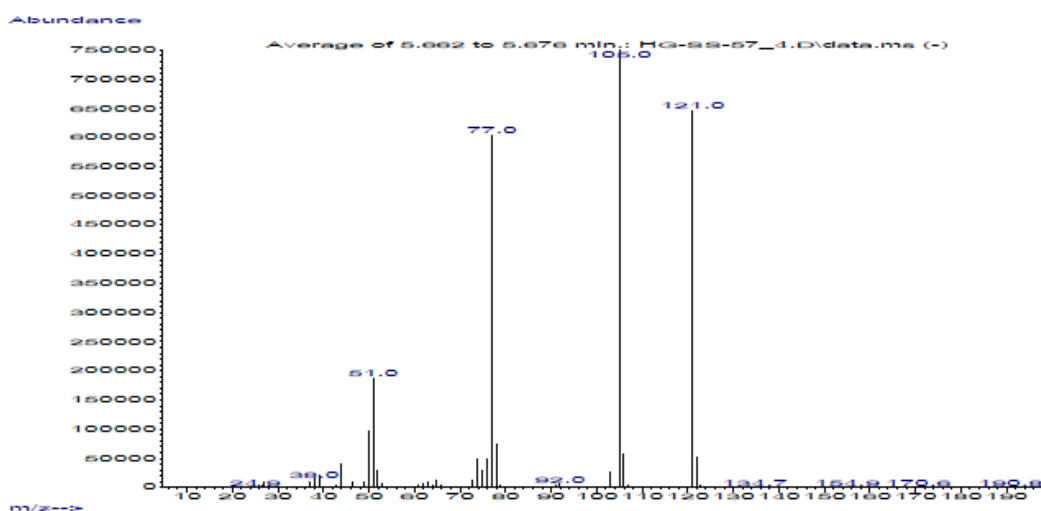

## 4-BROMOBENZONITRILE

### GC analysis of the 4-bromobenzonitrile substrate

RT in THF: 5.232 min

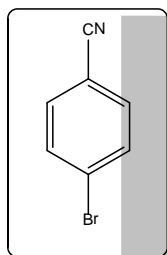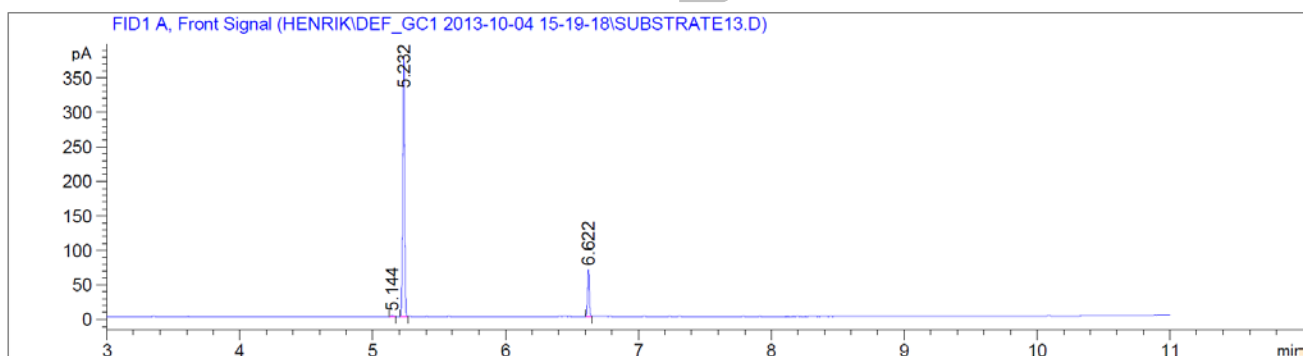

### GC analysis of the reaction mixtures of the catalytic reactions

Catalytic hydration of 4-bromobenzonitrile into 4-bromobenzamide (**c**) with  $\text{Pt}(\text{COD})\text{Cl}_2/\mathbf{1}$ , reaction time 2h

Yield: 51%.

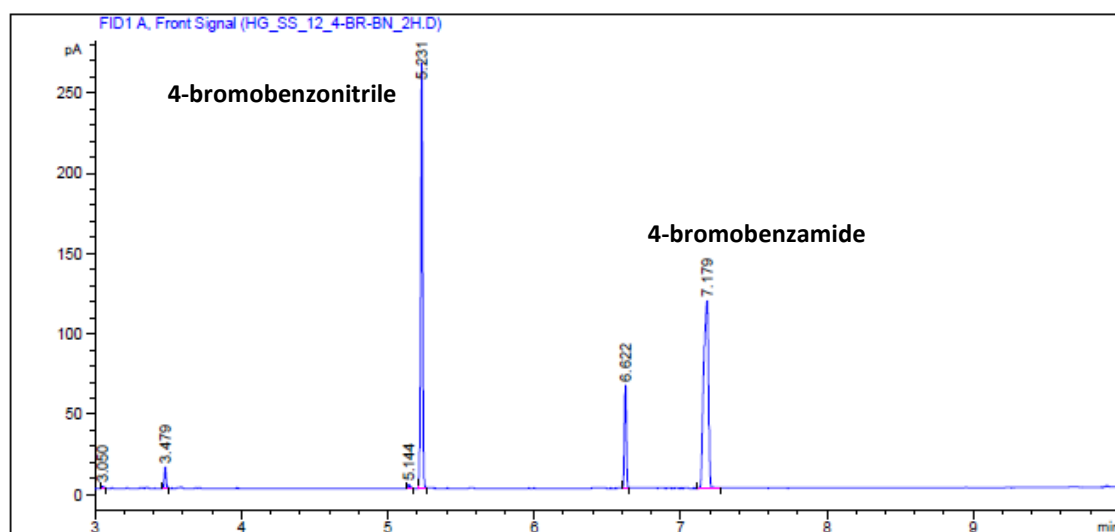



Catalytic hydration of 4-bromobenzonitrile into 4-bromobenzamide (c) with  $\text{Pt}(\text{COD})\text{Cl}_2/\mathbf{1}$ , reaction time 24h

Yield: 99%.

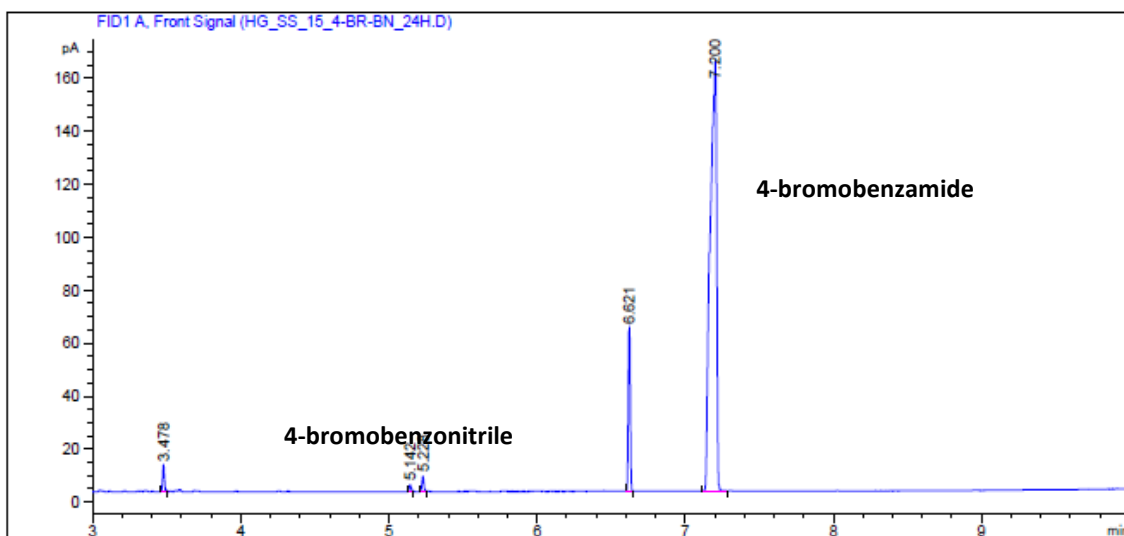

Catalytic hydration of 4-bromobenzonitrile into 4-bromobenzamide (c) with  $\text{Pt}(\text{PPh}_3)_4/\mathbf{1}$ , reaction time 1h

Yield: >99%.

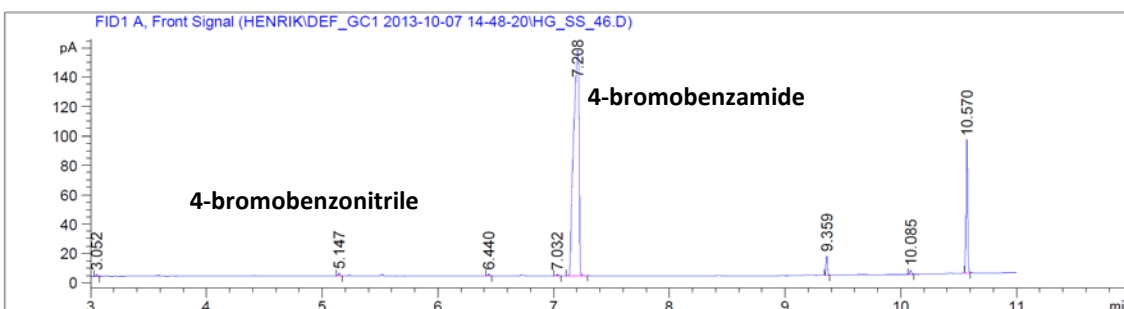

Catalytic hydration of 4-bromobenzonitrile into 4-bromobenzamide (c) with  $\text{Pt}(\text{COD})\text{Cl}_2/\text{AgNO}_3/\mathbf{1}$  reaction time 1h

Yield: >99%.

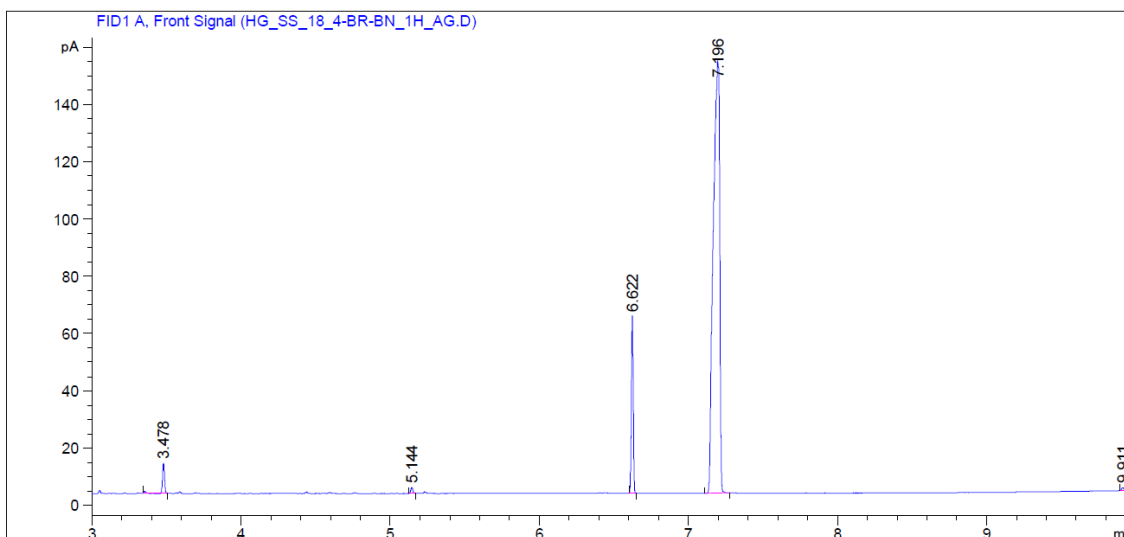

## Isolation of 4-bromobenzamide (c) (Scheme 3, Pt(COD)Cl<sub>2</sub>/1 system)

The product was isolated by column chromatography using a silica column and DCM:EtOH eluent mixture (v/v 10/1). Yield: 99 mg (99%). CAS: 698-67-9.

### Sample P15

HP-5MS, 30mx0.25mmx0.25µm  
Tinj-aux: 280°C  
1.5mL/min  
Split 100:1 (1µl)  
50°C-325°C(10')/20°Cmin-1  
Sample as received

Abundance

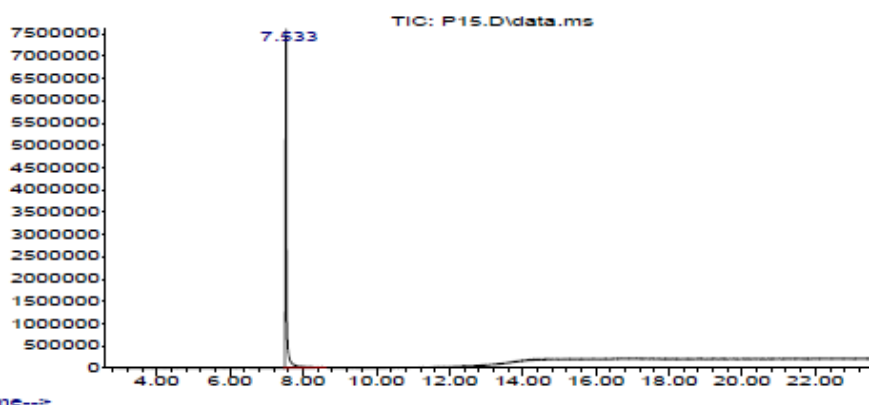

Time-->

Abundance

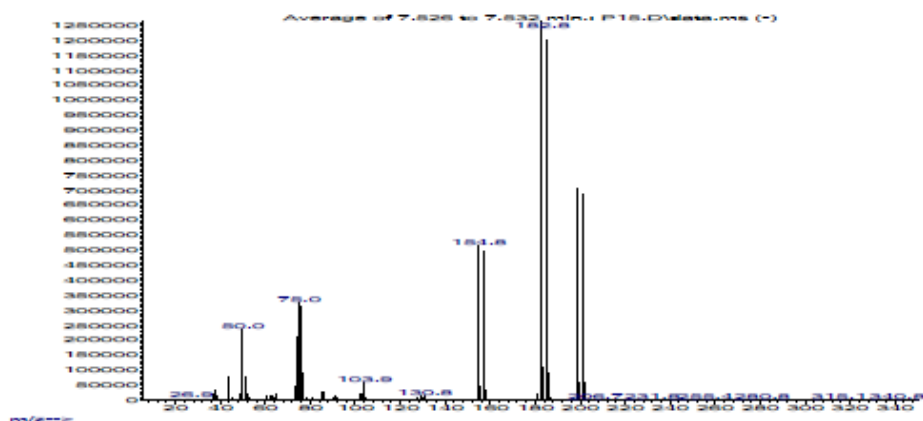

m/z-->

## 2-BROMOBENZONITRILE

### GC analysis of the 2-bromobenzonitrile substrate

RT in THF: 5.403 min

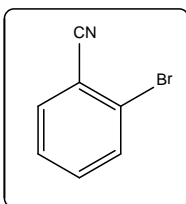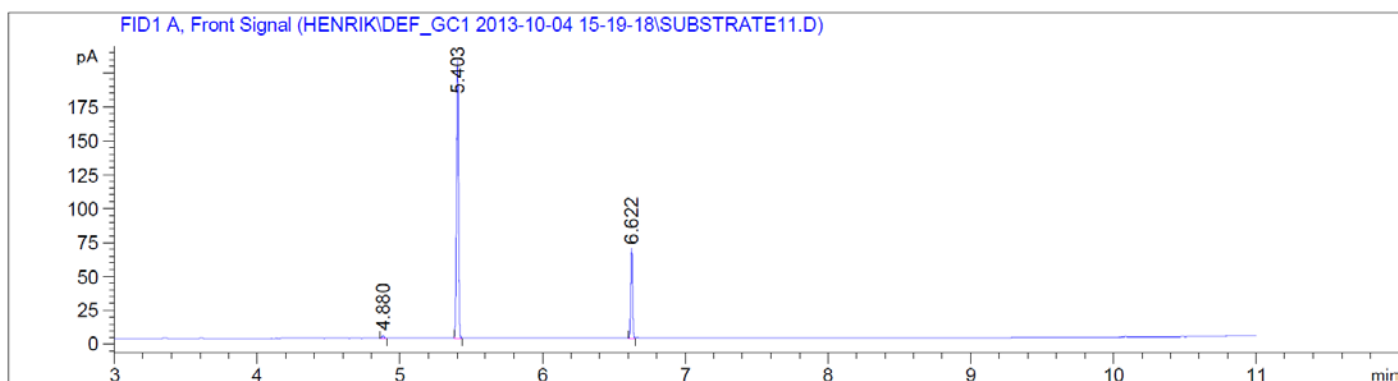

### GC analysis of the reaction mixtures of the catalytic reactions

Catalytic hydration of 2-bromobenzonitrile into 2-bromobenzamide (**e**) with Pt(COD)Cl<sub>2</sub>/**1**, reaction time 2h

Yield: 1.7%.

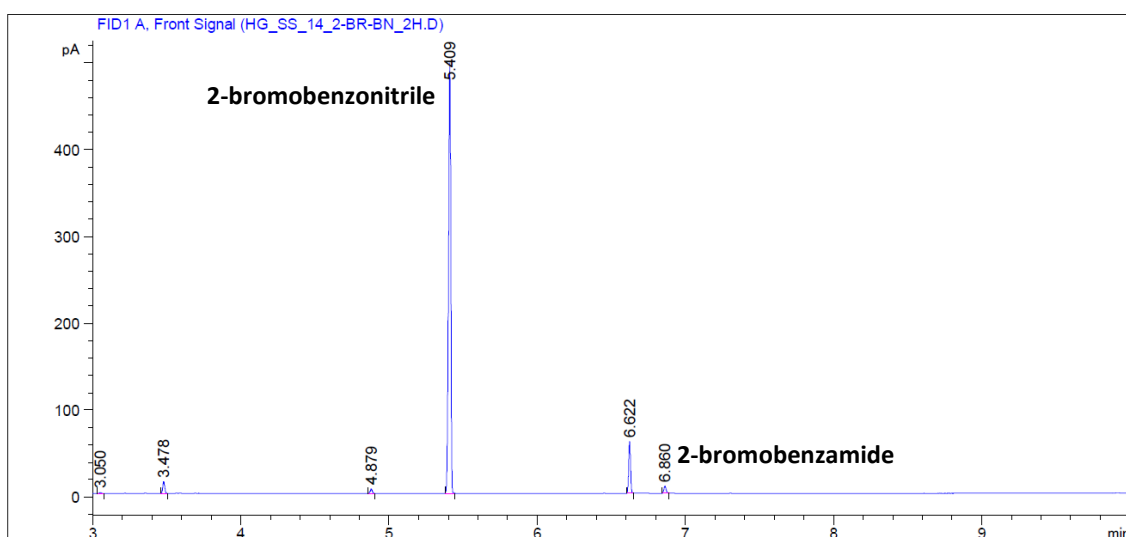

Catalytic hydration of 2-bromobenzonitrile into 2-bromobenzamide (**e**) with  $\text{Pt}(\text{COD})\text{Cl}_2/\mathbf{1}$ , reaction time 24h

Yield: 11%.

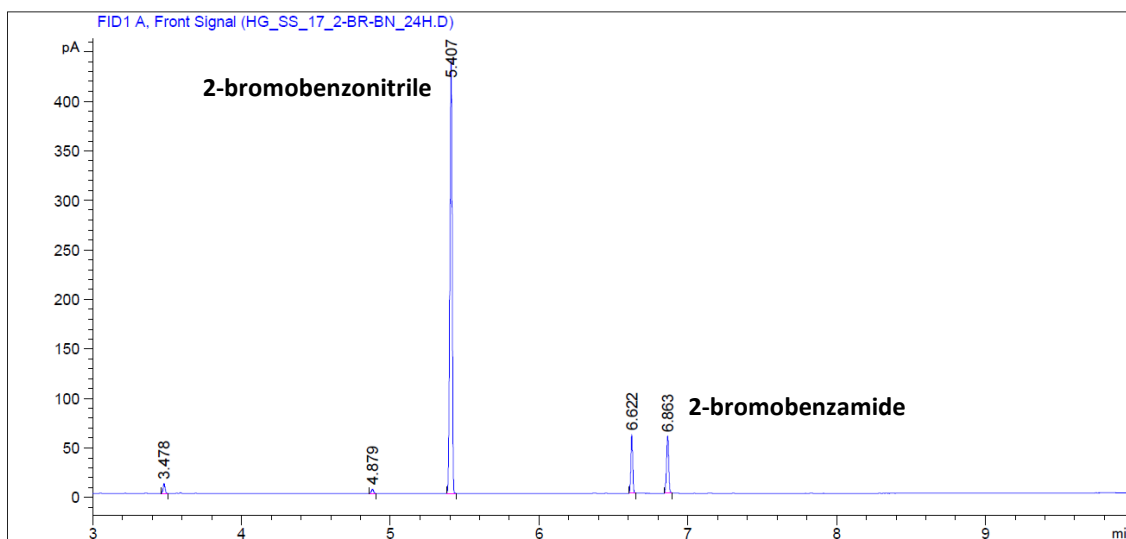

Catalytic hydration of 2-bromobenzonitrile into 2-bromobenzamide (**e**) with  $\text{Pt}(\text{PPh}_3)_4/\mathbf{1}$ , reaction time 1h

Yield: 96%.

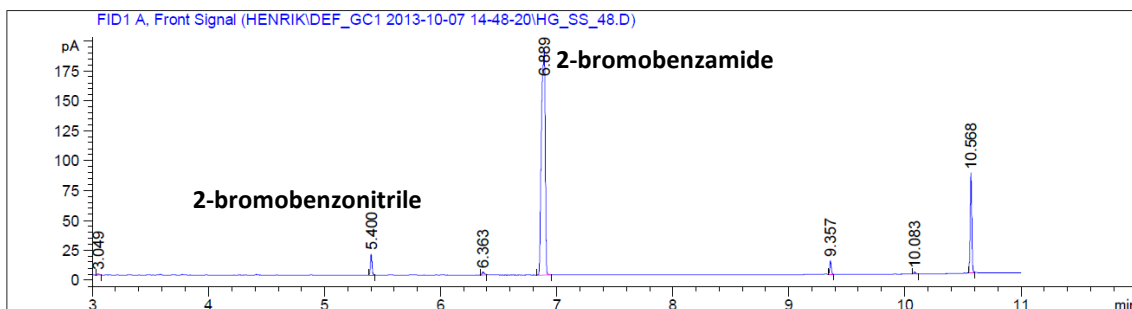

Catalytic hydration 2-bromobenzonitrile (into caboxamide **e**) with  $\text{Pt}(\text{COD})\text{Cl}_2/\text{AgNO}_3/\mathbf{1}$  reaction time 1h

Yield: 88%.

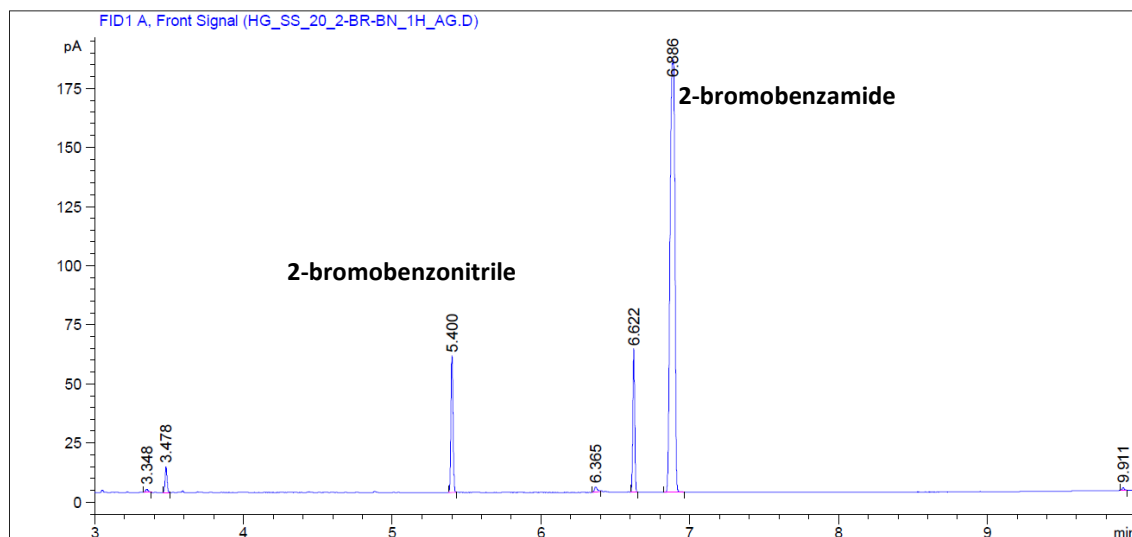

## Isolation of 2-bromobenzamide (e) (Scheme 4, Pt(COD)Cl<sub>2</sub>/AgNO<sub>3</sub>/1 system)

The product was isolated by column chromatography using a silica column and DCM:EtOH eluent mixture (v/v 10/1). Yield: 87 mg (87%). CAS: 4001-73-4.

### Sample HG-SS-20

HP-5MS, 30mx0.25mmx0.25µm  
Tinj-aux: 280°C  
1.5mL/min  
Split 20:1 (1.0µl)  
50°C-325°C(5')/20°Cmin-1  
Sample in DCM

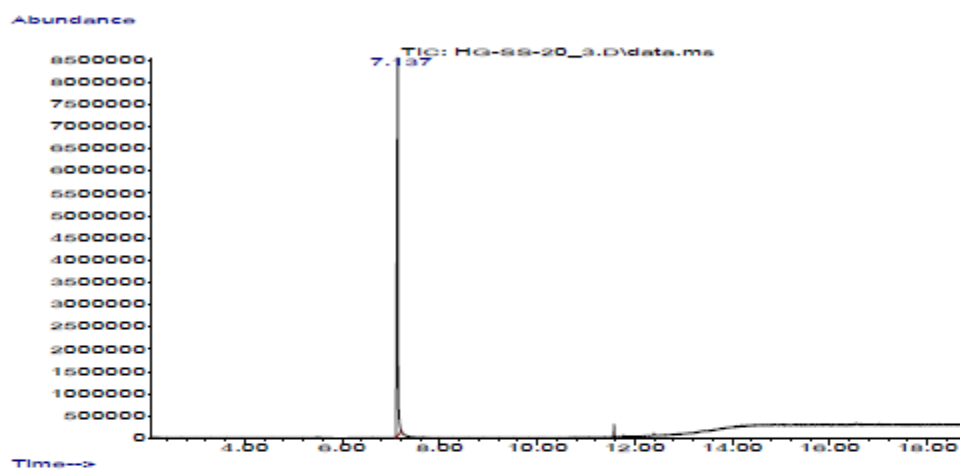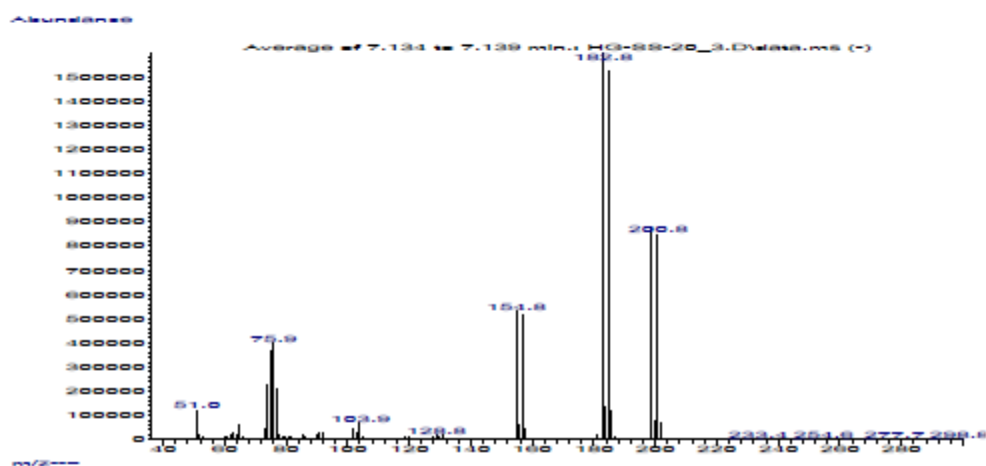

## 2-PHENYLPROPANENITRILE

### GC analysis of the 2-phenylpropanenitrile substrate

RT in THF: 4.838 min

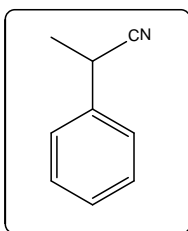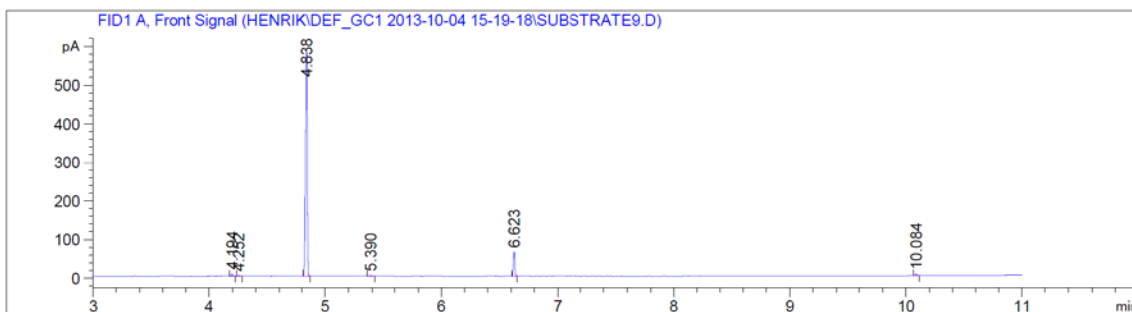

### GC analysis of the reaction mixtures of the catalytic reactions

Catalytic hydration of 2-phenylpropanenitrile into 2-phenylpropanamide (**k**) with Pt(COD)Cl<sub>2</sub>/**1**, reaction time 2h

Yield: 1.4%.

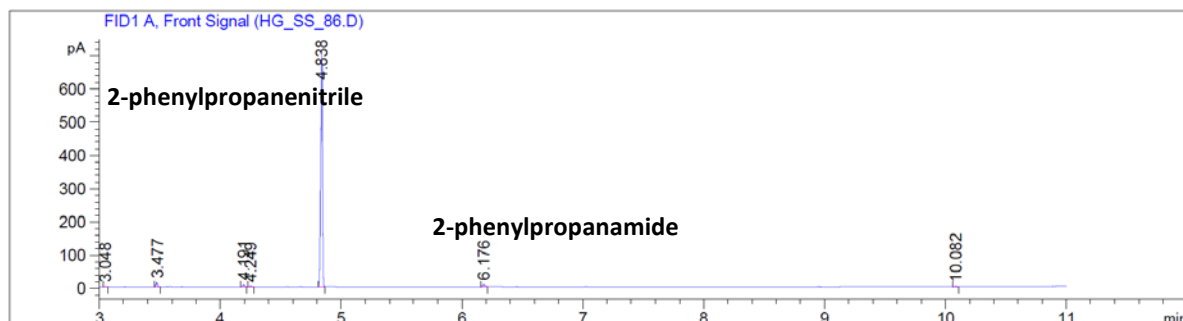

Catalytic hydration of 2-phenylpropanenitrile into 2-phenylpropanamide (**k**) with Pt(COD)Cl<sub>2</sub>/**1**, reaction time 24h

Yield: 19%.

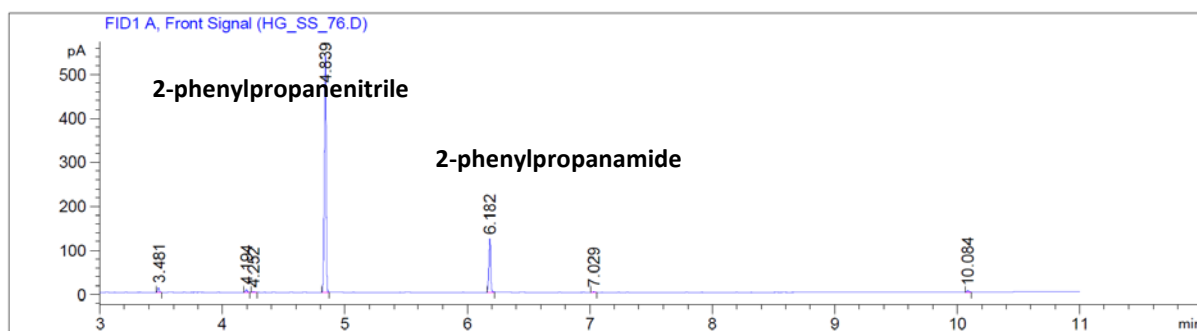

Catalytic hydration of 2-phenylpropanenitrile into 2-phenylpropanamide (**k**) with  $\text{Pt}(\text{PPh}_3)_4/\mathbf{1}$ , reaction time 1h

Yield: >99%.

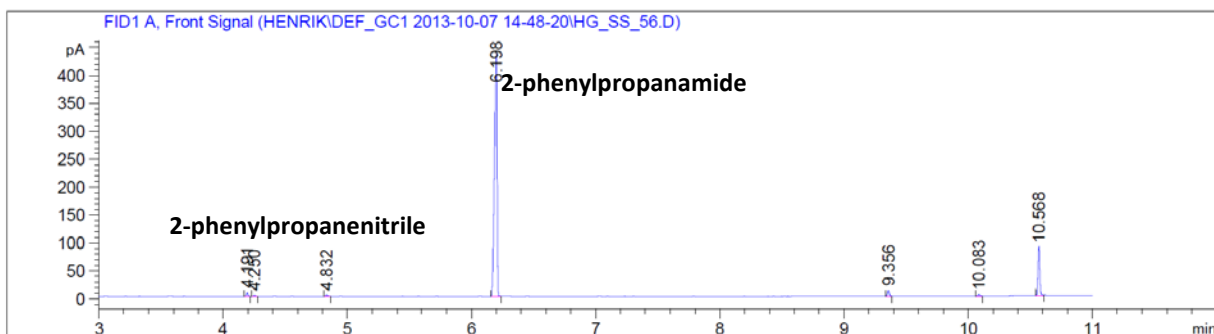

Catalytic hydration 2-phenylpropionitrile (into caboxamide **k**) with  $\text{Pt}(\text{COD})\text{Cl}_2/\text{AgNO}_3/\mathbf{1}$ , reaction time 1h

Yield: 99%.

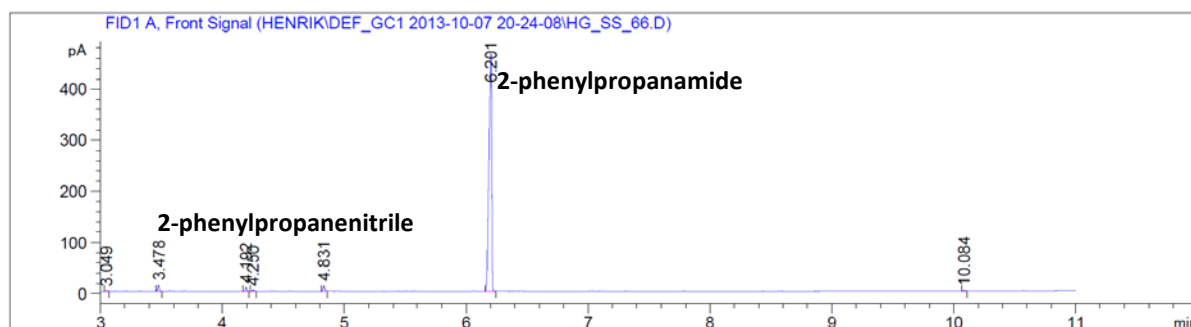

## Isolation of 2-phenylpropanamide (k) (Scheme 4, Pt(COD)Cl<sub>2</sub>/AgNO<sub>3</sub>/1 system)

The product was isolated on a chromatotron (centrifugal thin-layer chromatography) using a DCM:EtOH eluent mixture (v/v 10/1). Yield: 75 mg (quantitative). CAS: 1125-70-8.

### Sample P50

HP-5MS, 30mx0.25mmx0.25µm  
Tinj-aux: 280°C  
1.5mL/min  
Split 100:1 (1µl)  
50°C-325°C(10°)/20°Cmin-1  
Sample as received

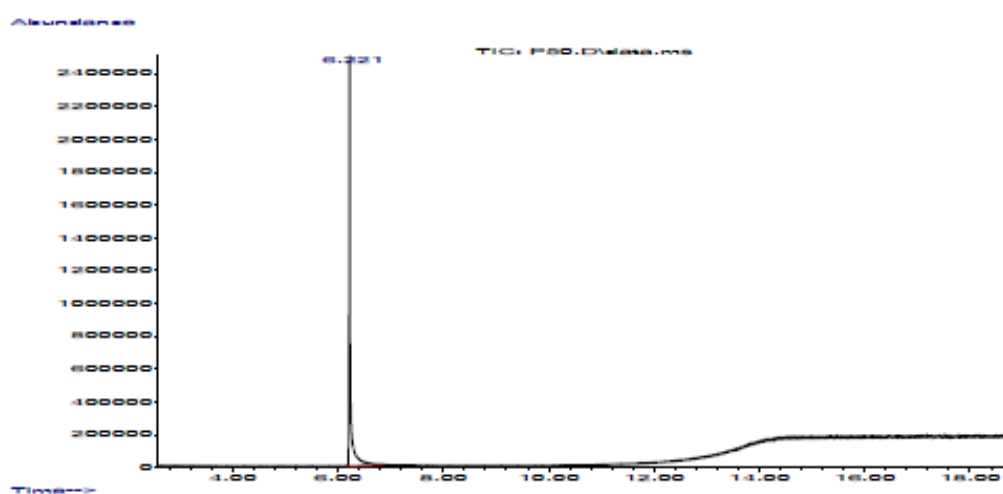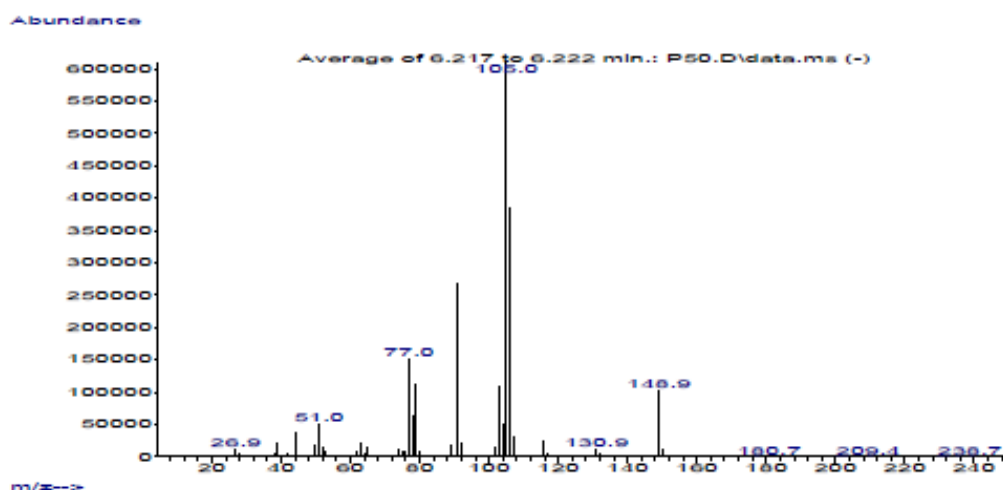



## 12. X-ray structures of 4-bromobenzamide (c), 3-bromobenzamide (d) and 2-bromobenzamide (e)

### X-ray structure of 4-bromobenzamide (c)

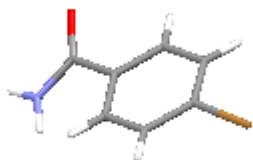

Table 1. Crystal data and structure refinement for 4-bromobenzamide (c)

|                                   |                                             |                             |
|-----------------------------------|---------------------------------------------|-----------------------------|
| Identification code               | HG483_0m                                    |                             |
| Empirical formula                 | C <sub>7</sub> H <sub>6</sub> Br N O        |                             |
| Formula weight                    | 200.04                                      |                             |
| Temperature                       | 100(2) K                                    |                             |
| Wavelength                        | 0.71073 Å                                   |                             |
| Crystal system                    | Monoclinic                                  |                             |
| Space group                       | P2(1)/c                                     |                             |
| Unit cell dimensions              | a = 4.9200(7) Å                             | $\alpha = 90.00^\circ$ .    |
|                                   | b = 5.3316(8) Å                             | $\beta = 93.562(6)^\circ$ . |
|                                   | c = 27.538(5) Å                             | $\gamma = 90.00^\circ$ .    |
| Volume                            | 720.97(19) Å <sup>3</sup>                   |                             |
| Z                                 | 4                                           |                             |
| Density (calculated)              | 1.843 Mg/m <sup>3</sup>                     |                             |
| Absorption coefficient            | 5.624 mm <sup>-1</sup>                      |                             |
| F(000)                            | 392                                         |                             |
| Crystal size                      | 0.40 x 0.40 x 0.15 mm <sup>3</sup>          |                             |
| Theta range for data collection   | 1.48 to 1.48 °.                             |                             |
| Index ranges                      | -7 ≤ h ≤ 7, -8 ≤ k ≤ 8, -43 ≤ l ≤ 43        |                             |
| Reflections collected             | 3157                                        |                             |
| Independent reflections           | 2791 [R(int) = 0.0639]                      |                             |
| Completeness to theta = 35.18 °   | 0.982 %                                     |                             |
| Absorption correction             | Empirical                                   |                             |
| Max. and min. transmission        | 0.4859 and 0.2119                           |                             |
| Refinement method                 | Full-matrix least-squares on F <sup>2</sup> |                             |
| Data / restraints / parameters    | 3157 / 0 / 91                               |                             |
| Goodness-of-fit on F <sup>2</sup> | 1.080                                       |                             |

|                               |                                    |
|-------------------------------|------------------------------------|
| Final R indices [I>2sigma(I)] | R1 = 0.0387 , wR2 = 0.1026         |
| R indices (all data)          | R1 = 0.0439 , wR2 = 0.1057         |
| Largest diff. peak and hole   | 1.820 and -1.372 e.Å <sup>-3</sup> |

Table 2. Bond lengths [Å] and angles [°] for 4-bromobenzamide (c)

---

|                  |            |
|------------------|------------|
| Bond lengths---- |            |
| Br1-C1           | 1.8961(15) |
| C1-C2            | 1.384(2)   |
| C1-C6            | 1.389(2)   |
| C4-C3            | 1.389(2)   |
| C4-C5            | 1.3986(19) |
| C4-C7            | 1.491(2)   |
| C2-C3            | 1.397(2)   |
| C5-C6            | 1.386(2)   |
| C7-O1            | 1.2454(15) |
| C7-N1            | 1.3419(17) |
| Angles-----      |            |
| C2-C1-C6         | 121.82(14) |
| C2-C1-Br1        | 120.29(12) |
| C6-C1-Br1        | 117.88(11) |
| C3-C4-C5         | 119.09(14) |
| C3-C4-C7         | 119.61(12) |
| C5-C4-C7         | 121.31(12) |
| C1-C2-C3         | 118.91(14) |
| C6-C5-C4         | 121.16(13) |
| C5-C6-C1         | 118.45(13) |
| C4-C3-C2         | 120.54(14) |
| O1-C7-N1         | 121.99(14) |
| O1-C7-C4         | 121.44(12) |
| N1-C7-C4         | 116.57(11) |

---

Table 3. Torsion angles [°] for 4-bromobenzamide (c)

|              |             |
|--------------|-------------|
| C6-C1-C2-C3  | 0.0(2)      |
| Br1-C1-C2-C3 | 178.97(12)  |
| C3-C4-C5-C6  | -0.8(2)     |
| C7-C4-C5-C6  | 179.01(14)  |
| C4-C5-C6-C1  | -0.9(2)     |
| C2-C1-C6-C5  | 1.3(2)      |
| Br1-C1-C6-C5 | -177.76(12) |
| C5-C4-C3-C2  | 2.0(2)      |
| C7-C4-C3-C2  | -177.75(14) |
| C1-C2-C3-C4  | -1.6(2)     |
| C3-C4-C7-O1  | -25.9(2)    |
| C5-C4-C7-O1  | 154.37(15)  |
| C3-C4-C7-N1  | 154.48(15)  |
| C5-C4-C7-N1  | -25.3(2)    |

***X-ray structure of 3-bromobenzamide (d)***

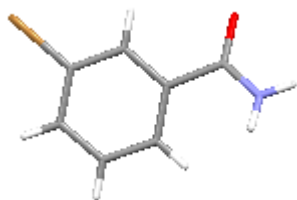

Table 1. Crystal data and structure refinement for 3-bromobenzamide (d)

|                      |                 |                             |
|----------------------|-----------------|-----------------------------|
| Identification code  | HG_SS16         |                             |
| Empirical formula    | C7 H6 Br N O    |                             |
| Formula weight       | 200.04          |                             |
| Temperature          | 100(2) K        |                             |
| Wavelength           | 0.71073 Å       |                             |
| Crystal system       | Monoclinic      |                             |
| Space group          | P2(1)/c         |                             |
| Unit cell dimensions | a = 16.189(2)Å  | $\alpha = 90^\circ$ .       |
|                      | b = 4.6448(7)Å  | $\beta = 92.866(5)^\circ$ . |
|                      | c = 9.8821(17)Å | $\gamma = 90^\circ$ .       |

|                                   |                                             |
|-----------------------------------|---------------------------------------------|
| Volume                            | 742.2(2) Å <sup>3</sup>                     |
| Z                                 | 4                                           |
| Density (calculated)              | 1.790 Mg/m <sup>3</sup>                     |
| Absorption coefficient            | 5.463 mm <sup>-1</sup>                      |
| F(000)                            | 392                                         |
| Crystal size                      | 0.25 x 0.25 x 0.04 mm <sup>3</sup>          |
| Theta range for data collection   | 1.259 to 30.536°.                           |
| Index ranges                      | -22<=h<=11,-6<=k<=2,-8<=l<=13               |
| Reflections collected             | 3504                                        |
| Independent reflections           | 1998[R(int) = 0.0448]                       |
| Completeness to theta =30.536°    | 87.6%                                       |
| Absorption correction             | Empirical                                   |
| Max. and min. transmission        | 0.811 and 0.624                             |
| Refinement method                 | Full-matrix least-squares on F <sup>2</sup> |
| Data / restraints / parameters    | 1998/ 0/ 91                                 |
| Goodness-of-fit on F <sup>2</sup> | 1.022                                       |
| Final R indices [I>2sigma(I)]     | R1 = 0.0524, wR2 = 0.1469                   |
| R indices (all data)              | R1 = 0.0660, wR2 = 0.1579                   |
| Largest diff. peak and hole       | 1.139 and -1.341 e.Å <sup>-3</sup>          |

Table 2. Bond lengths [Å] and angles [°] for 3-bromobenzamide (**d**)

---

|                  |          |
|------------------|----------|
| Bond lengths---- |          |
| Br1-C5           | 1.899(4) |
| N1-C7            | 1.329(5) |
| O1-C7            | 1.246(4) |
| C1-C2            | 1.392(5) |
| C1-C6            | 1.392(5) |
| C1-C7            | 1.504(5) |
| C2-C3            | 1.397(6) |
| C3-C4            | 1.379(6) |
| C4-C5            | 1.391(5) |
| C5-C6            | 1.400(5) |
| Angles-----      |          |
| C2-C1-C6         | 120.3(3) |
| C2-C1-C7         | 122.4(3) |

|           |          |
|-----------|----------|
| C6-C1-C7  | 117.3(3) |
| C1-C2-C3  | 119.8(4) |
| C4-C3-C2  | 121.0(4) |
| C3-C4-C5  | 118.6(4) |
| C4-C5-C6  | 121.8(4) |
| C4-C5-Br1 | 119.4(3) |
| C6-C5-Br1 | 118.8(3) |
| C1-C6-C5  | 118.5(3) |
| O1-C7-N1  | 122.8(4) |
| O1-C7-C1  | 120.3(3) |
| N1-C7-C1  | 116.9(3) |

-----

Table 3. Torsion angles [°] for 3-bromobenzamide (**d**)

|              |           |
|--------------|-----------|
| C6-C1-C2-C3  | -0.3(5)   |
| C7-C1-C2-C3  | 178.0(3)  |
| C1-C2-C3-C4  | -0.8(6)   |
| C2-C3-C4-C5  | 0.6(6)    |
| C3-C4-C5-C6  | 0.7(5)    |
| C3-C4-C5-Br1 | -178.7(3) |
| C2-C1-C6-C5  | 1.5(5)    |
| C7-C1-C6-C5  | -176.8(3) |
| C4-C5-C6-C1  | -1.7(5)   |
| Br1-C5-C6-C1 | 177.7(3)  |
| C2-C1-C7-O1  | 153.9(3)  |
| C6-C1-C7-O1  | -27.8(5)  |
| C2-C1-C7-N1  | -27.8(5)  |
| C6-C1-C7-N1  | 150.5(3)  |

-----

### X-ray structure of 2-bromobenzamide (e)

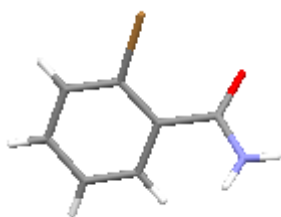

Table 1. Crystal data and structure refinement for 2-bromobenzamide (e)

|                                   |                                             |                             |
|-----------------------------------|---------------------------------------------|-----------------------------|
| Identification code               | HG_SS20_0m                                  |                             |
| Empirical formula                 | C7 H6 Br N O                                |                             |
| Formula weight                    | 200.04                                      |                             |
| Temperature                       | 100(2) K                                    |                             |
| Wavelength                        | 0.71073 Å                                   |                             |
| Crystal system                    | Monoclinic                                  |                             |
| Space group                       | P2(1)/n                                     |                             |
| Unit cell dimensions              | a = 5.0263(6)Å                              | $\alpha = 90^\circ$ .       |
|                                   | b = 10.9683(15)Å                            | $\beta = 93.465(3)^\circ$ . |
|                                   | c = 13.3113(14)Å                            | $\gamma = 90^\circ$ .       |
| Volume                            | 732.51(15) Å <sup>3</sup>                   |                             |
| Z                                 | 4                                           |                             |
| Density (calculated)              | 1.814 Mg/m <sup>3</sup>                     |                             |
| Absorption coefficient            | 5.535 mm <sup>-1</sup>                      |                             |
| F(000)                            | 392                                         |                             |
| Crystal size                      | 0.35 x 0.05 x 0.05 mm <sup>3</sup>          |                             |
| Theta range for data collection   | 2.408 to 31.971°.                           |                             |
| Index ranges                      | -7<=h<=2,-4<=k<=11,-17<=l<=8                |                             |
| Reflections collected             | 1110                                        |                             |
| Independent reflections           | 980[R(int) = 0.0073]                        |                             |
| Completeness to theta =31.971°    | 38.600002%                                  |                             |
| Absorption correction             | Empirical                                   |                             |
| Max. and min. transmission        | 0.769 and 0.626                             |                             |
| Refinement method                 | Full-matrix least-squares on F <sup>2</sup> |                             |
| Data / restraints / parameters    | 980/ 0/ 91                                  |                             |
| Goodness-of-fit on F <sup>2</sup> | 1.084                                       |                             |
| Final R indices [I>2sigma(I)]     | R1 = 0.0197, wR2 = 0.0499                   |                             |
| R indices (all data)              | R1 = 0.0227, wR2 = 0.0512                   |                             |
| Largest diff. peak and hole       | 0.247 and -0.214 e.Å <sup>-3</sup>          |                             |

Table 2. Bond lengths [Å] and angles [°] for 2-bromobenzamide (e)

---

| Bond lengths---- |            |
|------------------|------------|
| Br1-C3           | 1.903(3)   |
| N1-C1            | 1.336(2)   |
| O1-C1            | 1.238(3)   |
| C1-C2            | 1.492(4)   |
| C2-C7            | 1.387(4)   |
| C2-C3            | 1.407(3)   |
| C3-C4            | 1.387(4)   |
| C4-C5            | 1.377(5)   |
| C5-C6            | 1.398(4)   |
| C6-C7            | 1.380(4)   |
| Angles-----      |            |
| O1-C1-N1         | 121.8(3)   |
| O1-C1-C2         | 122.10(18) |
| N1-C1-C2         | 116.1(2)   |
| C7-C2-C3         | 117.7(3)   |
| C7-C2-C1         | 119.6(2)   |
| C3-C2-C1         | 122.6(2)   |
| C4-C3-C2         | 121.0(3)   |
| C4-C3-Br1        | 117.7(2)   |
| C2-C3-Br1        | 121.2(2)   |
| C5-C4-C3         | 119.7(2)   |
| C4-C5-C6         | 120.4(3)   |
| C7-C6-C5         | 119.2(3)   |
| C6-C7-C2         | 121.8(2)   |

---

Table 3. Torsion angles [°] for 2-bromobenzamide (e)

|              |           |
|--------------|-----------|
| O1-C1-C2-C7  | 137.3(3)  |
| N1-C1-C2-C7  | -41.4(4)  |
| O1-C1-C2-C3  | -44.0(4)  |
| N1-C1-C2-C3  | 137.3(3)  |
| C7-C2-C3-C4  | -3.3(4)   |
| C1-C2-C3-C4  | 177.9(3)  |
| C7-C2-C3-Br1 | 173.0(2)  |
| C1-C2-C3-Br1 | -5.7(4)   |
| C2-C3-C4-C5  | 2.7(4)    |
| Br1-C3-C4-C5 | -173.8(2) |
| C3-C4-C5-C6  | -1.1(5)   |
| C4-C5-C6-C7  | 0.3(5)    |
| C5-C6-C7-C2  | -1.1(5)   |
| C3-C2-C7-C6  | 2.6(4)    |
| C1-C2-C7-C6  | -178.7(3) |



### 13. Kinetic resolution in the hydration of [1,1'-binaphthalene]-2,2'-dicarbonitrile using the Pt(PPh<sub>3</sub>)<sub>4</sub>/1 and Pt(COD)Cl<sub>2</sub>/AgNO<sub>3</sub>/1 catalytic systems

#### Catalytic hydration of [1,1'-binaphthalene]-2,2'-dicarbonitrile with Pt(PPh<sub>3</sub>)<sub>4</sub>/1, reaction time 0.5h

HPLC, reversed phase. Conversion: 45%; yield of the enantioenriched dicarbonitrile (**2**): 55%; yield of the monoamide (**3**): 30%; yield of the diamide (**4**): 15%.

Data File C:\CHEM32\...\ZX\CON\MUESTRAS NUEVAS\HG-SS-92\_0-5H\_1H\_ZX\_H2O-ME0H\_10-100\_15\_2.D  
Sample Name: HG-SS-92\_0-5h

```

=====
Acq. Operator   : LFG                               Seq. Line :    3
Acq. Instrument : Instrument 1                       Location  : Vial 14
Injection Date  : 12/11/2013 10:32:29 AM           Inj       :    1
                                                    Inj Volume: 5 µL

Acq. Method    : C:\CHEM32\1\METHODS\APCI.M
Last changed   : 12/10/2013 6:53:34 PM by LFG
Analysis Method: C:\CHEM32\1\METHODS\END.M
Last changed   : 12/20/2013 4:38:19 PM by s
                (modified after loading)
Sample Info    : Zorbax XDB C18 100x4.6mm, 5µm
                H2O/ MeOH 90:10
                10% up to 100% in 15', hold 5'
                APCI +
                Samplein 100µL DCM
=====
    
```

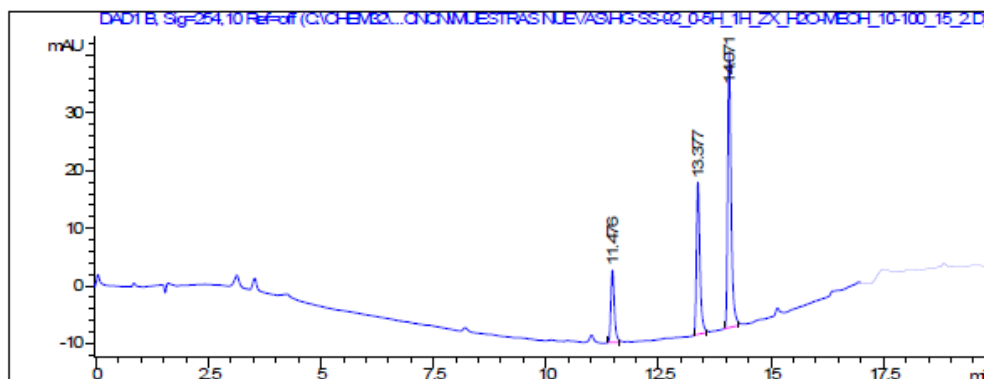

#### Area Percent Report

```

Sorted By      : Signal
Multiplier     : 1.0000
Dilution       : 1.0000
Use Multiplier & Dilution Factor with ISIDs
    
```

Signal 1: DAD1 B, Sig=254,10 Ref=off

| Peak # | RetTime [min] | Type | Width [min] | Area [mAU*s] | Height [mAU] | Area %  |
|--------|---------------|------|-------------|--------------|--------------|---------|
| 1      | 11.476        | BB   | 0.0828      | 67.55444     | 12.54962     | 14.5712 |
| 2      | 13.377        | BB   | 0.0826      | 141.63557    | 26.41323     | 30.5502 |
| 3      | 14.071        | BB   | 0.0799      | 254.42584    | 47.97517     | 54.8786 |

Totals : 463.61586 86.93802

\*\*\* End of Report \*\*\*

Chiral HPLC, normal phase. E.r. of the enantioenriched dicyanonitrile (2): 71/29.

Data File C:\CHEM32\...\2013\PVL\MST\HG\MUESTRAS NOVIEMBRE\HG-SS-92-05H\_IC\_HEX-ETOH\_20\_2.D  
 Sample Name: HG-SS-92-05H

```

=====
Acq. Operator   : sc                               Seq. Line :   1
Acq. Instrument : Instrument 2                     Location  : Vial 1
Injection Date  : 12/20/2013 4:08:22 PM          Inj       :   1
                                                    Inj Volume: 5 µl

Acq. Method     : C:\CHEM32\2\METHODS\CHIRAL IC1.M
Last changed    : 12/20/2013 4:31:20 PM by sc
                  (modified after loading)
Analysis Method : C:\CHEM32\2\METHODS\CHIRAL SCREENING_IC1.M
Last changed    : 12/20/2013 5:05:58 PM by sc
                  (modified after loading)
Sample Info     : Chiralpack IC 250x4.6mm, 5µm
                  Hex / EtOH 80:20
                  1 mL/min
                  25°C
                  Sample: in 100µL DCM
=====
  
```

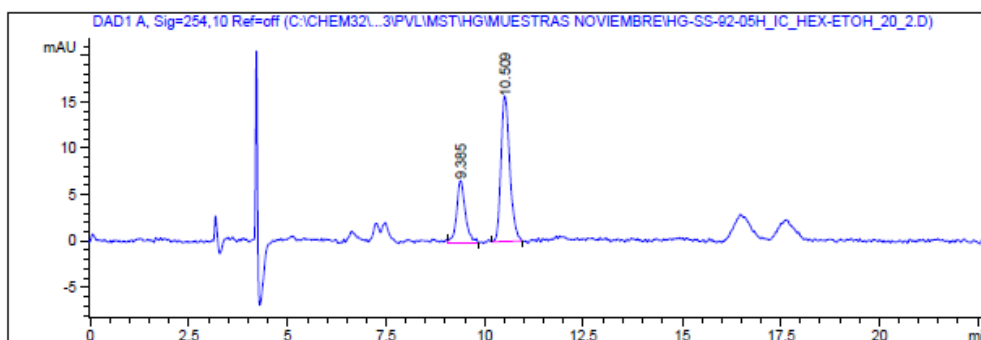

=====  
 Area Percent Report  
 =====

```

Sorted By      :      Signal
Multiplier     :      1.0000
Dilution      :      1.0000
Use Multiplier & Dilution Factor with ISTDs
  
```

Signal 1: DAD1 A, Sig=254,10 Ref=off

| Peak # | RetTime [min] | Type | Width [min] | Area [mAU*s] | Height [mAU] | Area %  |
|--------|---------------|------|-------------|--------------|--------------|---------|
| 1      | 9.385         | BB   | 0.2481      | 101.05391    | 6.40451      | 29.2756 |
| 2      | 10.509        | BB   | 0.2507      | 244.12706    | 15.25613     | 70.7244 |

Totals :                                    345.18097    21.66065

Chiral HPLC, normal phase. E.r. of the monoamide (3): 32/68; e.r. of the diamide (4): >99/1.

Data File C:\CHEM32\...\PVL\MST\HG\MUESTRAS NOVIEMBRE\HG-SS-92-05H\_IC\_HEX-DCM-ETOH\_65-5\_2.D  
 Sample Name: HG-SS-92-05H

```

=====
Acq. Operator   : sc                               Seq. Line :    2
Acq. Instrument : Instrument 2                     Location  : Vial 1
Injection Date  : 12/20/2013 4:42:41 PM          Inj       :    1
                                                    Inj Volume: 5 µl

Acq. Method    : C:\CHEM32\2\METHODS\CHIRAL IC2.M
Last changed   : 11/22/2013 4:44:10 PM by MH
Analysis Method: C:\CHEM32\2\METHODS\CHIRAL SCREENING_IC1.M
Last changed   : 12/20/2013 5:05:58 PM by sc
                (modified after loading)
Sample Info    : Chiralpack IC 250x4.6mm, 5µm
                Hex / DCM / EtOH 30:65:5
                1 mL/min
                25°C
                Sample: as received
  
```

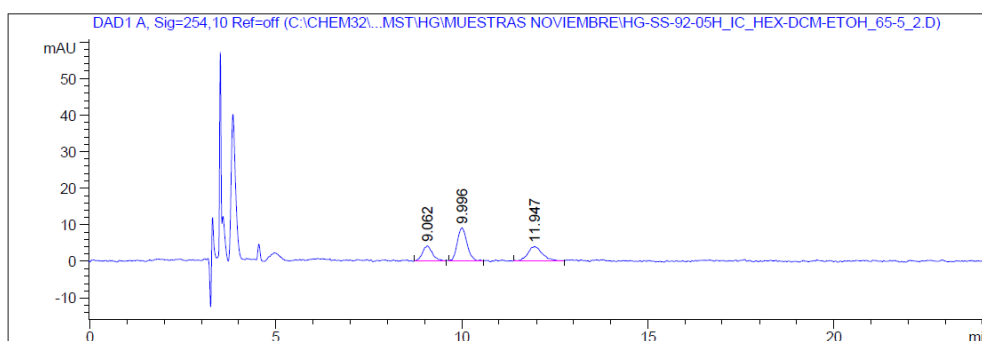

Area Percent Report

```

=====
Sorted By      :      Signal
Multiplier     :      1.0000
Dilution      :      1.0000
Use Multiplier & Dilution Factor with ISTDs
  
```

Signal 1: DAD1 A, Sig=254,10 Ref=off

| Peak # | RetTime [min] | Type | Width [min] | Area [mAU*s] | Height [mAU] | Area %  |
|--------|---------------|------|-------------|--------------|--------------|---------|
| 1      | 9.062         | BB   | 0.2841      | 76.55771     | 4.05778      | 22.0678 |
| 2      | 9.996         | BB   | 0.2951      | 164.66672    | 8.93102      | 47.4652 |
| 3      | 11.947        | BB   | 0.4149      | 105.69659    | 3.86704      | 30.4670 |

Totals :                                    346.92102    16.85584

**Catalytic hydration of [1,1'-binaphthalene]-2,2'-dicarbonitrile with Pt(PPh<sub>3</sub>)<sub>4</sub>/1, reaction time 1h**

HPLC, reversed phase. Conversion: 67%; yield of the enantioenriched dicyanitrile (**2**): 33%; yield of the monoamide (**3**): 32%; yield of the diamide (**4**): 35%.

Data File C:\CHEM32\...\CNER\ZX\CNCN\MUESTRAS NUEVAS\HG-SS-92\_1H\_ZX\_H2O-MECH\_10-100\_15\_2.D  
Sample Name: HG-SS-92\_1h

```
=====
Acq. Operator   : LFG                               Seq. Line :    4
Acq. Instrument : Instrument 1                       Location  : Vial 15
Injection Date  : 12/11/2013 10:57:31 AM          Inj       :    1
                                                    Inj Volume: 5 µl

Acq. Method     : C:\CHEM32\1\METHODS\APCI.M
Last changed    : 12/10/2013 6:53:34 PM by LFG
Analysis Method : C:\CHEM32\1\METHODS\END.M
Last changed    : 12/19/2013 11:26:23 AM by LFG
                (modified after loading)
Sample Info     : Zorbax XDB C18 100x4.6mm, 5µm
                H2O/ MeOH 90:10
                10% up to 100% in 15', hold 5'
                APCI +
                Sample as received
=====
```

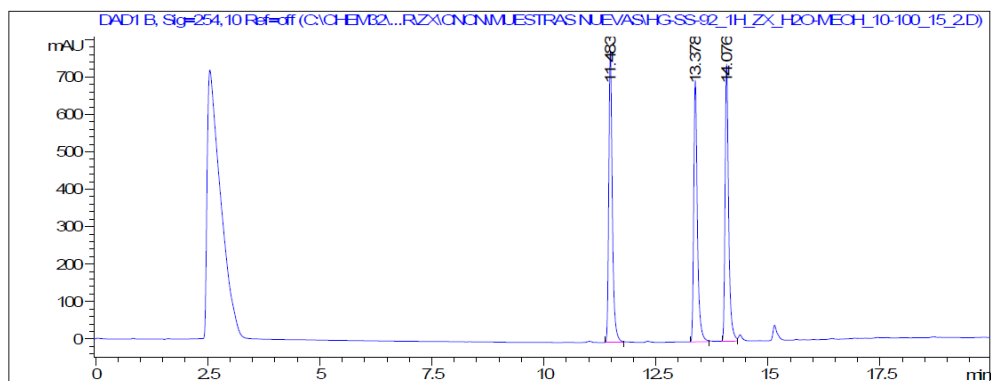

Area Percent Report

```
Sorted By      :      Signal
Multiplier     :      1.0000
Dilution       :      1.0000
Use Multiplier & Dilution Factor with ISTDs
```

Signal 1: DAD1 B, Sig=254,10 Ref=off

| Peak # | RetTime [min] | Type | Width [min] | Area [mAU*s] | Height [mAU] | Area %  |
|--------|---------------|------|-------------|--------------|--------------|---------|
| 1      | 11.483        | BB   | 0.0846      | 4295.11084   | 776.11755    | 35.1106 |
| 2      | 13.378        | BB   | 0.0830      | 3899.77026   | 699.96521    | 31.8789 |
| 3      | 14.076        | EV   | 0.0816      | 4038.20044   | 740.63208    | 33.0105 |

Totals : 1.22331e4 2216.71484

\*\*\* End of Report \*\*\*

Chiral HPLC, normal phase. E.r. of the enantioenriched dicarbonitrile (2): 10/90.

Data File C:\CHEM32\...\127\2013\PVL\MST\HG\MUESTRAS NOVIEMBRE\HG-SS-92-1H\_IC\_HEX-ETOH\_20.D  
 Sample Name: HG-SS-92-1H

```

=====
Acq. Operator   : sc                               Seq. Line :    7
Acq. Instrument : Instrument 2                     Location  : Vial 6
Injection Date  : 11/26/2013 2:08:39 PM          Inj       :    1
                                                    Inj Volume: 5 µl

Acq. Method    : C:\CHEM32\2\METHODS\CHIRAL IC1.M
Last changed   : 11/22/2013 4:40:02 PM by MH
Analysis Method : C:\CHEM32\2\METHODS\CHIRAL SCREENING_IC.M
Last changed   : 12/19/2013 10:58:05 AM by sc
                (modified after loading)
Sample Info    : Chiralpack IC 250x4.6mm, 5µm
                Hex / EtOH 80:20
                1 mL/min
                25°C
                Sample: as received
  
```

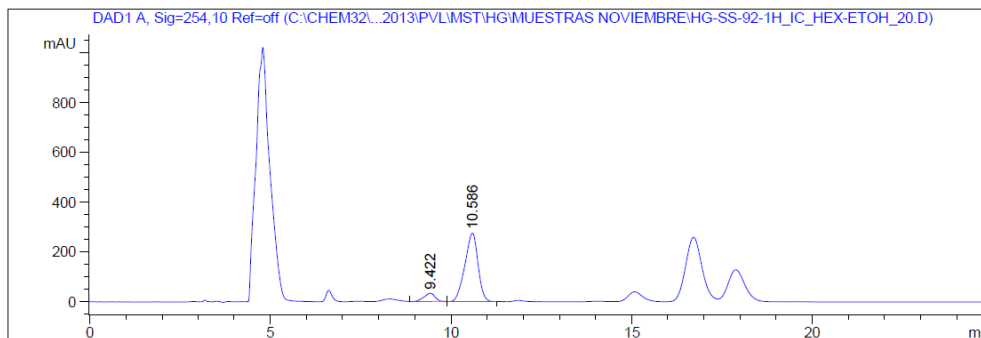

=====  
 Area Percent Report  
 =====

```

Sorted By      :      Signal
Multiplier     :      1.0000
Dilution      :      1.0000
Use Multiplier & Dilution Factor with ISTDs
  
```

Signal 1: DAD1 A, Sig=254,10 Ref=off

| Peak # | RetTime [min] | Type | Width [min] | Area [mAU*s] | Height [mAU] | Area %  |
|--------|---------------|------|-------------|--------------|--------------|---------|
| 1      | 9.422         | VV   | 0.3210      | 747.02631    | 33.64717     | 9.6951  |
| 2      | 10.586        | VB   | 0.3727      | 6958.15723   | 275.45242    | 90.3049 |

Totals :                                7705.18353   309.09960

Chiral HPLC, normal phase. E.r. of the monoamide (3): 50/50; e.r. of the diamide (4): 86/14.

Data File C:\CHEM32\...13\PVL\MST\HG\MUESTRAS NOVIEMBRE\HG-SS-92-1H\_IC\_HEX-DCM-ETOH\_65-5.D  
 Sample Name: HG-SS-92-1H

```

=====
Acq. Operator   : sc                               Seq. Line :   16
Acq. Instrument : Instrument 2                     Location  : Vial 6
Injection Date  : 11/26/2013 6:05:05 PM          Inj       :    1
                                                    Inj Volume: 5 µl

Acq. Method    : C:\CHEM32\2\METHODS\CHIRAL IC2.M
Last changed   : 11/22/2013 4:44:10 PM by MH
Analysis Method: C:\CHEM32\2\METHODS\CHIRAL SCREENING_IC.M
Last changed   : 12/19/2013 11:19:28 AM by sc
                (modified after loading)

Sample Info    : Chiralpack IC 250x4.6mm, 5µm
                Hex / DCM / EtOH 30:65:5
                1 mL/min
                25°C
                Sample: as received
  
```

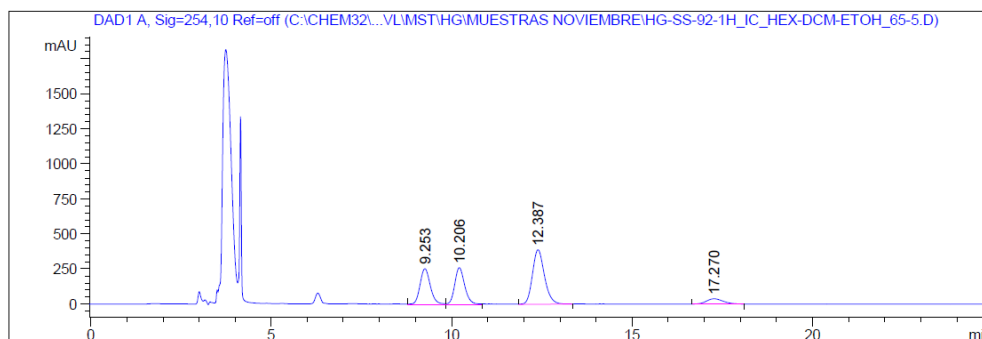

=====  
 Area Percent Report  
 =====

```

Sorted By       : Signal
Multiplier      : 1.0000
Dilution       : 1.0000
Use Multiplier & Dilution Factor with ISTDs
  
```

Signal 1: DAD1 A, Sig=254,10 Ref=off

| Peak # | RetTime [min] | Type | Width [min] | Area [mAU*s] | Height [mAU] | Area %  |
|--------|---------------|------|-------------|--------------|--------------|---------|
| 1      | 9.253         | VV   | 0.3081      | 5136.05615   | 256.00064    | 24.6276 |
| 2      | 10.206        | VV   | 0.2960      | 5099.90234   | 263.21988    | 24.4542 |
| 3      | 12.387        | VV   | 0.3583      | 9192.74219   | 390.92609    | 44.0795 |
| 4      | 17.270        | VV   | 0.4710      | 1426.19421   | 40.28499     | 6.8387  |

Totals :                                      2.08549e4    950.43159

**Catalytic hydration of [1,1'-binaphthalene]-2,2'-dicarbonitrile with Pt(PPh<sub>3</sub>)<sub>4</sub>/1, reaction time 1.5h**

HPLC, reversed phase. Conversion: 77%; yield of the enantioenriched dicarbonitrile (**2**): 23%; yield of the monoamide (**3**): 27%; yield of the diamide (**4**): 50%.

Data File C:\CHEM32\...-CNBR\ZX\CNCN\MUESTRAS NUEVAS\HG-SS-92\_1-5H\_ZX\_H2O-MECH\_10-100\_15.D  
Sample Name: HG-SS-92\_1-5h

```
=====
Acq. Operator   : LFG                               Seq. Line :    8
Acq. Instrument : Instrument 1                       Location  : Vial 23
Injection Date  : 12/11/2013 12:37:39 PM           Inj       :    1
                                                    Inj Volume: 5 µl

Acq. Method    : C:\CHEM32\1\METHODS\APCI.M
Last changed   : 12/10/2013 6:53:34 PM by LFG
Analysis Method: C:\CHEM32\1\METHODS\END.M
Last changed   : 12/19/2013 11:26:23 AM by LFG
                (modified after loading)
Sample Info    : Zorbax XDB C18 100x4.6mm, 5µm
                H2O/ MeOH 90:10
                10% up to 100% in 15', hold 5'
                APCI +
                Sample as received
=====
```

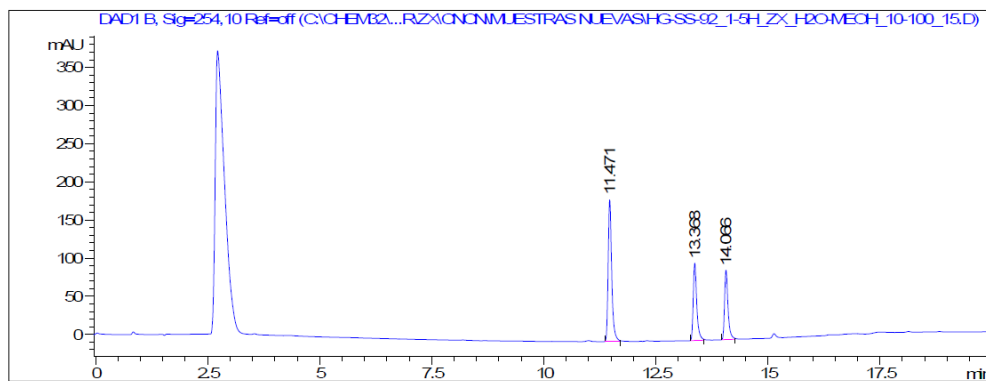

=====  
Area Percent Report  
=====

```
Sorted By      :      Signal
Multiplier     :      1.0000
Dilution       :      1.0000
Use Multiplier & Dilution Factor with ISTDs
```

Signal 1: DAD1 B, Sig=254,10 Ref=off

| Peak # | RetTime [min] | Type | Width [min] | Area [mAU*s] | Height [mAU] | Area %  |
|--------|---------------|------|-------------|--------------|--------------|---------|
| 1      | 11.471        | BB   | 0.0842      | 1022.19702   | 185.81451    | 49.5068 |
| 2      | 13.368        | BB   | 0.0841      | 557.47748    | 101.39591    | 26.9996 |
| 3      | 14.066        | BB   | 0.0801      | 485.08466    | 91.19616     | 23.4935 |

Totals :                                   2064.75916   378.40659

=====  
\*\*\* End of Report \*\*\*

Chiral HPLC, normal phase. E.r. of the enantioenriched dicyanitrile (2): 96/4.

Data File C:\CHEM32\...\18-12-2013\VC98 2013-12-19 13-15-35\HG-SS-92-1-5H\_IC\_HEX-ETOH\_20.D  
 Sample Name: HG-SS-92-1-5h

```

=====
Acq. Operator   : sc                               Seq. Line :    4
Acq. Instrument : Instrument 1                       Location  : Vial 5
Injection Date  : 12/19/2013 2:21:02 PM           Inj       :    1
                                                    Inj Volume: 5 µl

Acq. Method    : C:\Chem32\1\DATA\18-12-2013\VC98 2013-12-19 13-15-35\CHIRAL IC.M
Last changed   : 12/19/2013 12:56:18 PM by sc
Analysis Method : C:\CHEM32\1\METHODS\CHIRAL IC2.M
Last changed   : 12/19/2013 3:56:58 PM by sc
                (modified after loading)
Sample Info    : Chiralpak IC 250x4.6mm, 5µm
                Hex / EtOH 80:20
                1mL/min
                25°C
                sample as received
  
```

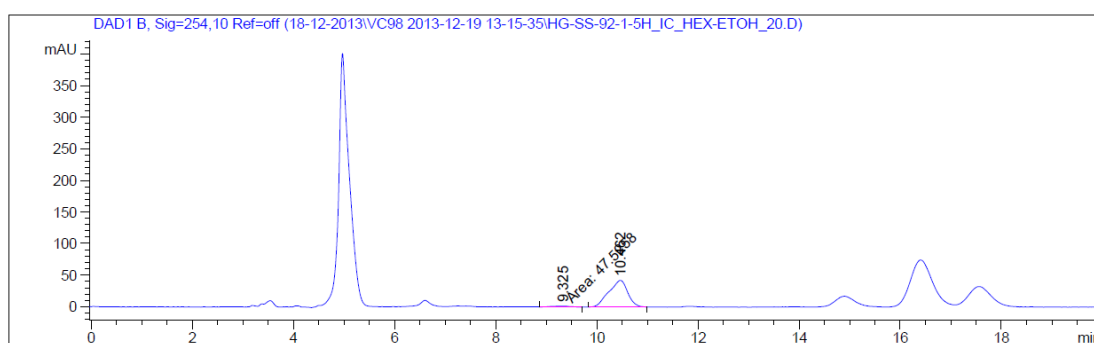

=====  
 Area Percent Report  
 =====

```

Sorted By      :      Signal
Multiplier     :      1.0000
Dilution      :      1.0000
Use Multiplier & Dilution Factor with ISTDs
  
```

Signal 1: DAD1 B, Sig=254,10 Ref=off

| Peak # | RetTime [min] | Type | Width [min] | Area [mAU*s] | Height [mAU] | Area %  |
|--------|---------------|------|-------------|--------------|--------------|---------|
| 1      | 9.325         | MM   | 0.4746      | 47.52580     | 1.66903      | 4.1216  |
| 2      | 10.462        | BV   | 0.3682      | 1105.56458   | 42.40327     | 95.8784 |

Totals :                                    1153.09037    44.07230



Chiral HPLC, normal phase. E.r. of the monoamide (3): 72/28; e.r. of the diamide (4): 83/17.

Data File C:\CHEM32\...-2013\VC98 2013-12-19 13-15-35\HG-SS-92-1-5H\_IC\_HEX-DCM-ETOH\_65-5.D  
 Sample Name: HG-SS-92-1-5h

```

=====
Acq. Operator   : sc                               Seq. Line : 10
Acq. Instrument : Instrument 1                     Location  : Vial 5
Injection Date  : 12/19/2013 4:28:59 PM          Inj       : 1
                                                    Inj Volume: 5 µl

Acq. Method     : C:\Chem32\1\DATA\18-12-2013\VC98 2013-12-19 13-15-35\CHIRAL IC2.M
Last changed    : 12/19/2013 12:57:54 PM by sc
Analysis Method : C:\CHEM32\1\METHODS\CHIRAL IC2.M
Last changed    : 12/19/2013 3:56:58 PM by sc
                (modified after loading)
Sample Info     : Chiralpak IC 250x4.6mm, 5µm
                Hex / DCM / EtOH 30:65:5
                1mL/min
                25°C
                sample as received
    
```

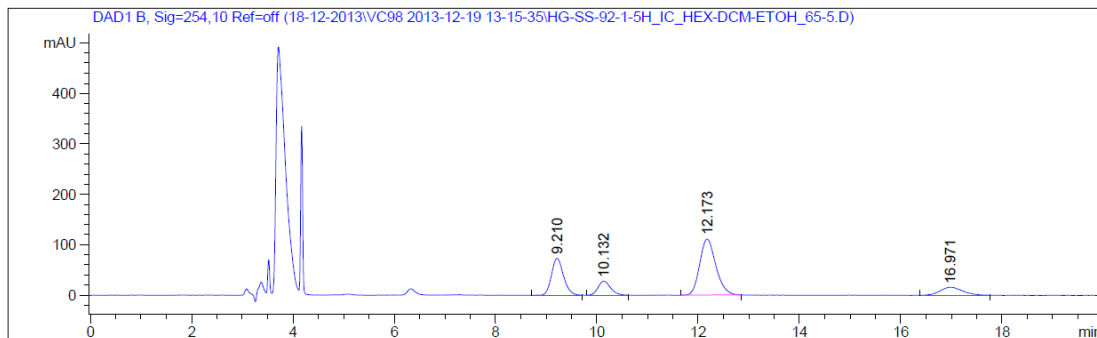

Area Percent Report

```

Sorted By      : Signal
Multiplier     : 1.0000
Dilution      : 1.0000
Use Multiplier & Dilution Factor with ISTDs
    
```

Signal 1: DAD1 B, Sig=254,10 Ref=off

| Peak #   | RetTime [min] | Type | Width [min] | Area [mAU*s] | Height [mAU] | Area %  |
|----------|---------------|------|-------------|--------------|--------------|---------|
| 1        | 9.210         | VB   | 0.2499      | 1217.86023   | 73.27901     | 25.9517 |
| 2        | 10.132        | BB   | 0.2564      | 488.28006    | 28.14875     | 10.4049 |
| 3        | 12.173        | BB   | 0.3379      | 2476.42358   | 111.15575    | 52.7708 |
| 4        | 16.971        | VB   | 0.3899      | 510.22571    | 16.18047     | 10.8725 |
| Totals : |               |      |             | 4692.78958   | 228.76398    |         |

**Catalytic hydration of [1,1'-binaphthalene]-2,2'-dicarbonitrile with Pt(PPh<sub>3</sub>)<sub>4</sub>/1, reaction time 2h**

HPLC, reversed phase. Conversion: 83%; yield of the enantioenriched dicarbonitrile (**2**): 17%; yield of the monoamide (**3**): 23%; yield of the diamide (**4**): 60%.

Data File C:\CHEM32\...\CN-CNER\ZX\CNCN\MUESTRAS NUEVAS\HG-SS-92\_2H\_ZX\_H2O-MECH\_10-100\_15.D  
 Sample Name: HG-SS-92\_2h

```

=====
Acq. Operator   : LFG                               Seq. Line :    9
Acq. Instrument : Instrument 1                       Location  : Vial 24
Injection Date  : 12/11/2013 1:02:41 PM           Inj       :    1
                                                    Inj Volume: 5 µl

Acq. Method    : C:\CHEM32\1\METHODS\APCI.M
Last changed   : 12/10/2013 6:53:34 PM by LFG
Analysis Method: C:\CHEM32\1\METHODS\END.M
Last changed   : 12/19/2013 11:26:23 AM by LFG
                (modified after loading)
Sample Info    : Zorbax XDB C18 100x4.6mm, 5µm
                H2O/ MeOH 90:10
                10% up to 100% in 15', hold 5'
                APCI +
                Sample as received
=====
  
```

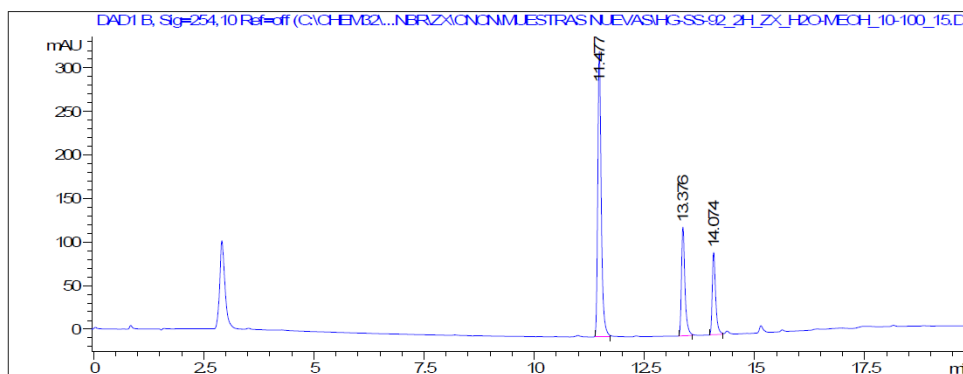

Area Percent Report

```

Sorted By      :      Signal
Multiplier     :      1.0000
Dilution       :      1.0000
Use Multiplier & Dilution Factor with ISTDs
  
```

Signal 1: DAD1 B, Sig=254,10 Ref=off

| Peak # | RetTime [min] | Type | Width [min] | Area [mAU*s] | Height [mAU] | Area %  |
|--------|---------------|------|-------------|--------------|--------------|---------|
| 1      | 11.477        | BB   | 0.0841      | 1803.32397   | 328.03119    | 60.2039 |
| 2      | 13.376        | BB   | 0.0842      | 689.61877    | 125.32379    | 23.0229 |
| 3      | 14.074        | BB   | 0.0800      | 502.41931    | 94.59338     | 16.7732 |

Totals : 2995.36206 547.94836

\*\*\* End of Report \*\*\*

Chiral HPLC, normal phase. E.r. of the enantioenriched dicyanonitrile (2): 2/98.

Data File C:\CHEM32\...TA\18-12-2013\VC98 2013-12-19 13-15-35\HG-SS-92-2H\_IC\_HEX-ETOH\_20.D  
 Sample Name: HG-SS-92-2h

```

=====
Acq. Operator   : sc                               Seq. Line :    5
Acq. Instrument : Instrument 1                     Location  : Vial 6
Injection Date  : 12/19/2013 2:42:24 PM          Inj       :    1
                                                    Inj Volume: 5 µl

Acq. Method     : C:\Chem32\1\DATA\18-12-2013\VC98 2013-12-19 13-15-35\CHIRAL IC.M
Last changed    : 12/19/2013 12:56:18 PM by sc
Analysis Method : C:\CHEM32\1\METHODS\CHIRAL IC2.M
Last changed    : 12/19/2013 3:56:58 PM by sc
                  (modified after loading)
Sample Info     : Chiralpak IC 250x4.6mm, 5µm
                  Hex / EtOH 80:20
                  1mL/min
                  25°C
                  sample as received
  
```

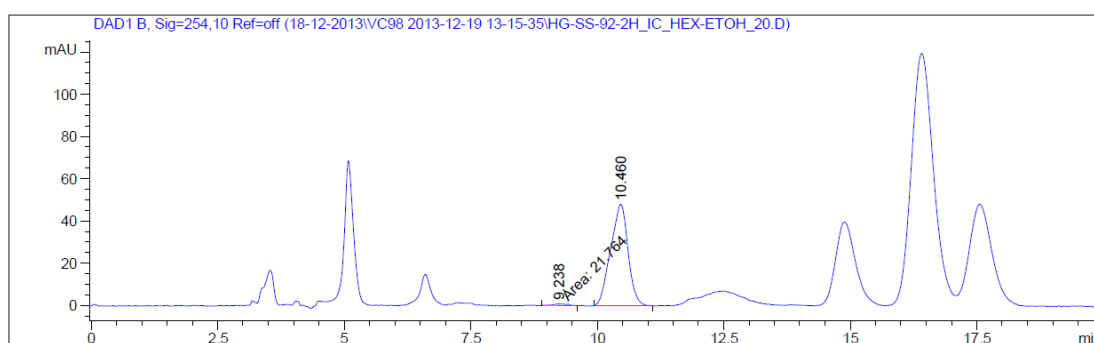

Area Percent Report

```

Sorted By      : Signal
Multiplier     : 1.0000
Dilution       : 1.0000
Use Multiplier & Dilution Factor with ISTDs
  
```

Signal 1: DAD1 B, Sig=254,10 Ref=off

| Peak # | RetTime [min] | Type | Width [min] | Area [mAU*s] | Height [mAU] | Area %  |
|--------|---------------|------|-------------|--------------|--------------|---------|
| 1      | 9.238         | MM   | 0.3978      | 21.76396     | 9.11840e-1   | 1.8569  |
| 2      | 10.460        | BB   | 0.3392      | 1150.30652   | 48.07404     | 98.1431 |

Totals : 1172.07048 48.98588

Chiral HPLC, normal phase. E.r. of the monoamide (3): 86/14; e.r. of the diamide (4): 76/24.

Data File C:\CHEM32\...12-2013\VC98 2013-12-19 13-15-35\HG-SS-92-2H\_IC\_HEX-DCM-ETOH\_65-5.D  
 Sample Name: HG-SS-92-2h

```

=====
Acq. Operator   : sc                               Seq. Line : 11
Acq. Instrument : Instrument 1                     Location  : Vial 6
Injection Date  : 12/19/2013 4:50:23 PM          Inj       : 1
                                                    Inj Volume: 5 µl

Acq. Method    : C:\Chem32\1\DATA\18-12-2013\VC98 2013-12-19 13-15-35\CHIRAL IC2.M
Last changed   : 12/19/2013 12:57:54 PM by sc
Analysis Method: C:\CHEM32\2\METHODS\CHIRAL SCREENING_IC1.M
Last changed   : 12/20/2013 5:16:36 PM by sc
                (modified after loading)
Sample Info    : Chiralpak IC 250x4.6mm, 5µm
                Hex / DCM / EtOH 30:65:5
                mL/min
                25°C
                sample as received
    
```

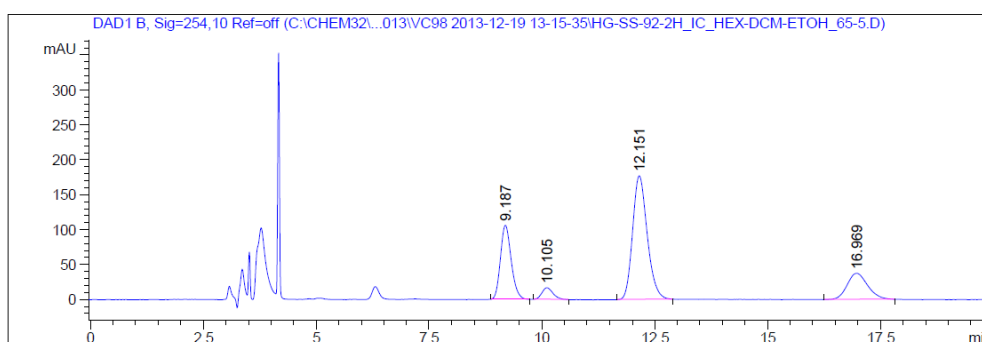

Area Percent Report

```

=====
Sorted By      : Signal
Multiplier     : 1.0000
Dilution      : 1.0000
Use Multiplier & Dilution Factor with ISTDs
    
```

Signal 1: DAD1 B, Sig=254,10 Ref=off

| Peak # | RetTime [min] | Type | Width [min] | Area [mAU*s] | Height [mAU] | Area %  |
|--------|---------------|------|-------------|--------------|--------------|---------|
| 1      | 9.187         | BB   | 0.2555      | 1759.92163   | 106.10857    | 24.2970 |
| 2      | 10.105        | BB   | 0.2554      | 291.90778    | 16.90764     | 4.0300  |
| 3      | 12.151        | BB   | 0.3429      | 3993.02393   | 177.20164    | 55.1265 |
| 4      | 16.969        | VB   | 0.4233      | 1198.52576   | 37.65733     | 16.5465 |

Totals : 7243.37909 337.87519

**Catalytic hydration of [1,1'-binaphthalene]-2,2'-dicarbonitrile with Pt(COD)<sub>2</sub>Cl<sub>2</sub>/AgNO<sub>3</sub>/1, reaction time 0.5h**

HPLC, reversed phase. Conversion: 48%; yield of the enantioenriched dicyanitrile (**2**): 52%; yield of the monoamide (**3**): 31%; yield of the diamide (**4**): 17%.

Data File C:\CHEM32\...\BR\ZX\CNCN\MUESTRAS NUEVAS\HG-SS-96\_0-5H\_1H\_ZX\_H2O-MECH\_10-100\_15.D  
 Sample Name: HG-SS-96\_0-5h

```

=====
Acq. Operator   : LFG                               Seq. Line : 10
Acq. Instrument : Instrument 1                       Location  : Vial 10
Injection Date  : 12/10/2013 11:00:48 EM          Inj       : 1
                                                    Inj Volume: 5 µl

Acq. Method    : C:\CHEM32\1\METHODS\APCI.M
Last changed   : 12/10/2013 6:53:34 PM by LFG
Analysis Method : C:\CHEM32\1\METHODS\END.M
Last changed   : 12/19/2013 11:26:23 AM by LFG
                (modified after loading)

Sample Info    : Zorbax XDB C18 100x4.6mm, 5µm
                H2O/ MeOH 90:10
                10% up to 100% in 15', hold 5'
                APCI +
                Sample as received
=====
  
```

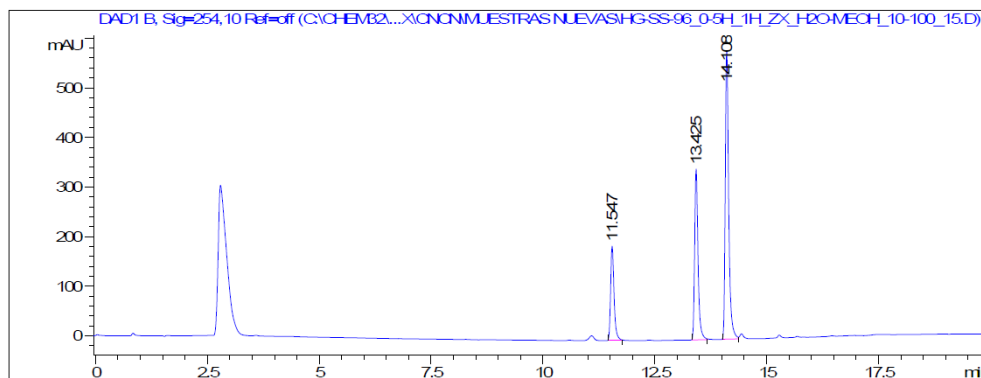

Area Percent Report

```

Sorted By      : Signal
Multiplier     : 1.0000
Dilution      : 1.0000
Use Multiplier & Dilution Factor with ISIDs
  
```

Signal 1: DAD1 B, Sig=254,10 Ref=off

| Peak # | RetTime [min] | Type | Width [min] | Area [mAU*s] | Height [mAU] | Area %  |
|--------|---------------|------|-------------|--------------|--------------|---------|
| 1      | 11.547        | EB   | 0.0806      | 1023.40985   | 190.67078    | 17.2501 |
| 2      | 13.425        | EB   | 0.0797      | 1820.82080   | 344.44064    | 30.6909 |
| 3      | 14.108        | EV   | 0.0796      | 3088.54883   | 584.51880    | 52.0591 |

Totals : 5932.77948 1119.63022

\*\*\* End of Report \*\*\*

Chiral HPLC, normal phase. E.r. of the enantioenriched dicyanonitrile (2): 28/72.

Data File C:\CHEM32\...27\2013\PVL\MST\HG\MUESTRAS NOVIEMBRE\HG-SS-96-05H\_IC\_HEX-ETOH\_20.D  
 Sample Name: HG-SS-96-05H

```

=====
Acq. Operator   : sc                               Seq. Line :    2
Acq. Instrument : Instrument 2                     Location  : Vial 1
Injection Date  : 11/26/2013 11:57:03 AM         Inj       :    1
                                                    Inj Volume: 5 µl

Acq. Method    : C:\CHEM32\2\METHODS\CHIRAL IC1.M
Last changed   : 11/22/2013 4:40:02 PM by MH
Analysis Method: C:\CHEM32\2\METHODS\CHIRAL SCREENING_IC.M
Last changed   : 12/19/2013 10:58:05 AM by sc
                (modified after loading)
Sample Info    : Chiralpack IC 250x4.6mm, 5µm
                Hex / ETOH 80:20
                1 mL/min
                25°C
                Sample: as received
  
```

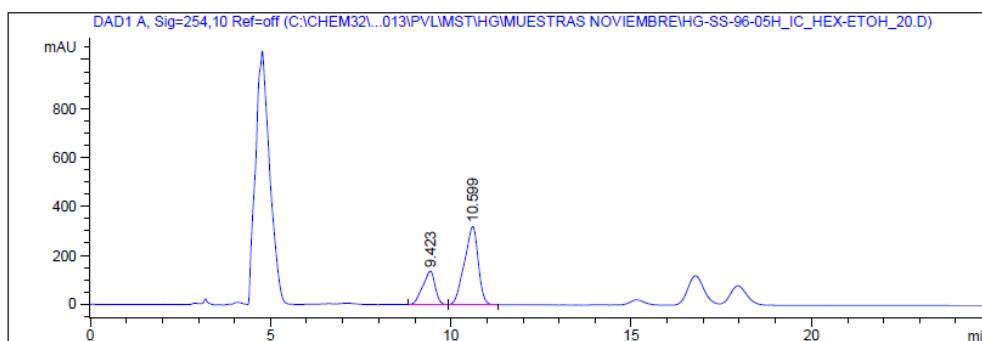

```

=====
                          Area Percent Report
=====
  
```

```

Sorted By      :      Signal
Multiplier     :      1.0000
Dilution      :      1.0000
Use Multiplier & Dilution Factor with ISTDs
  
```

Signal 1: DAD1 A, Sig=254,10 Ref=off

| Peak # | RetTime [min] | Type | Width [min] | Area [mAU*s] | Height [mAU] | Area %  |
|--------|---------------|------|-------------|--------------|--------------|---------|
| 1      | 9.423         | BV   | 0.3416      | 3281.65430   | 136.95309    | 27.8240 |
| 2      | 10.599        | VB   | 0.3890      | 8512.66602   | 319.36984    | 72.1760 |

Totals : 1.17943e4 456.32294

Chiral HPLC, normal phase. E.r. of the monoamide (3): 33/67; e.r. of the diamide (4): 85/15.

Data File C:\CHEM32\...3\PVL\MST\HG\MUESTRAS NOVIEMBRE\HG-SS-96-05H\_IC\_HEX-DCM-ETOH\_65-5.D  
Sample Name: HG-SS-96-05H

```
=====  
Acq. Operator   : sc                               Seq. Line :   11  
Acq. Instrument : Instrument 2                     Location  : Vial 1  
Injection Date  : 11/26/2013 3:53:24 PM           Inj       :    1  
                                                    Inj Volume: 5 µl  
  
Acq. Method     : C:\CHEM32\2\METHODS\CHIRAL IC2.M  
Last changed    : 11/22/2013 4:44:10 PM by MH  
Analysis Method : C:\CHEM32\2\METHODS\CHIRAL SCREENING_IC.M  
Last changed    : 12/19/2013 11:19:28 AM by sc  
                (modified after loading)  
Sample Info     : Chiralpack IC 250x4.6mm, 5µm  
                Hex / DCM / EtOH 30:65:5  
                1 mL/min  
                25°C  
                Sample: as received
```

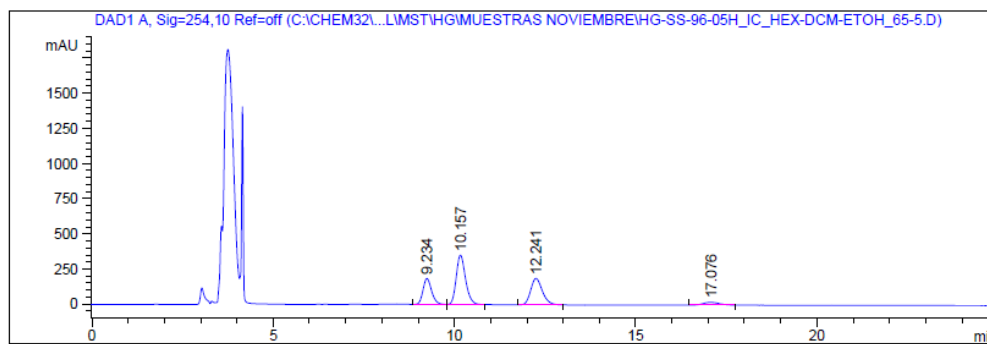

```
=====  
Area Percent Report  
=====
```

```
Sorted By      :      Signal  
Multiplier     :      1.0000  
Dilution       :      1.0000  
Use Multiplier & Dilution Factor with ISTDs
```

Signal 1: DAD1 A, Sig=254,10 Ref=off

| Peak # | RetTime [min] | Type | Width [min] | Area [mAU*s] | Height [mAU] | Area %  |
|--------|---------------|------|-------------|--------------|--------------|---------|
| 1      | 9.234         | VV   | 0.2662      | 3259.55981   | 188.06247    | 22.0303 |
| 2      | 10.157        | VV   | 0.2798      | 6498.92090   | 354.57260    | 43.9241 |
| 3      | 12.241        | VV   | 0.3489      | 4331.87354   | 189.33440    | 29.2777 |
| 4      | 17.076        | VV   | 0.4091      | 705.43457    | 21.15105     | 4.7678  |

```
Totals :                               1.47958e4  753.12051
```

**Catalytic hydration of [1,1'-binaphthalene]-2,2'-dicarbonitrile with Pt(COD)<sub>2</sub>Cl<sub>2</sub>/AgNO<sub>3</sub>/1, reaction time 1h**

HPLC, reversed phase. Conversion: 63%; yield of the enantioenriched dicyanitrile (**2**): 37%; yield of the monoamide (**3**): 30%; yield of the diamide (**4**): 33%.

Data File C:\CHEM32\...\CN-CNER\ZX\CNCN\MUESTRAS NUEVAS\HG-SS-96\_1H\_ZX\_H2O-MECH\_10-100\_15.D  
Sample Name: HG-SS-96\_1h

```
=====
Acq. Operator   : LFG                               Seq. Line : 11
Acq. Instrument : Instrument 1                       Location  : Vial 11
Injection Date  : 12/10/2013 11:25:52 AM          Inj       : 1
                                                    Inj Volume: 5 µl

Acq. Method     : C:\CHEM32\1\METHODS\APCI.M
Last changed    : 12/10/2013 6:53:34 PM by LFG
Analysis Method : C:\CHEM32\1\METHODS\END.M
Last changed    : 12/19/2013 11:26:23 AM by LFG
                  (modified after loading)

Sample Info     : Zorbax XDB C18 100x4.6mm, 5µm
                  H2O/ MeOH 90:10
                  10% up to 100% in 15', hold 5'
                  APCI +
                  Sample as received
=====
```

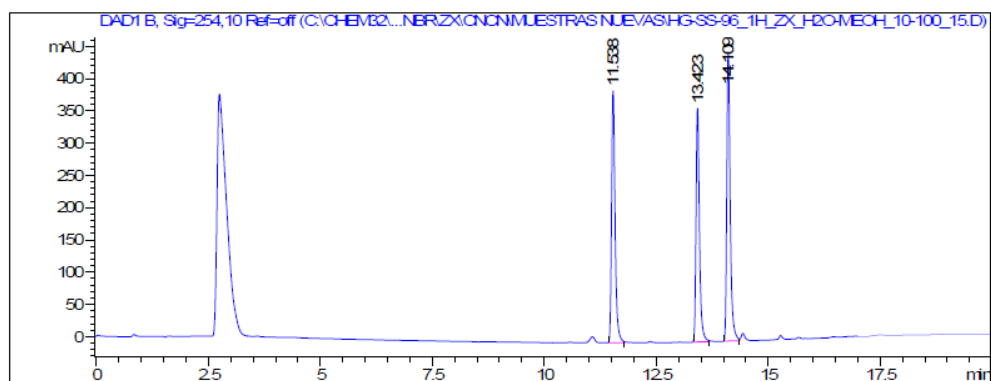

Area Percent Report

```
Sorted By      : Signal
Multiplier     : 1.0000
Dilution       : 1.0000
Use Multiplier & Dilution Factor with ISIDs
```

Signal 1: DAD1 B, Sig=254,10 Ref=off

| Peak # | RetTime [min] | Type | Width [min] | Area [mAU*s] | Height [mAU] | Area %  |
|--------|---------------|------|-------------|--------------|--------------|---------|
| 1      | 11.538        | BB   | 0.0832      | 2118.43872   | 391.09674    | 33.0793 |
| 2      | 13.423        | BB   | 0.0817      | 1925.26819   | 363.74927    | 30.0629 |
| 3      | 14.109        | EV   | 0.0793      | 2360.41699   | 448.95795    | 36.8578 |

Totals : 6404.12390 1203.80396

\*\*\* End of Report \*\*\*



Chiral HPLC, normal phase. E.r. of the enantioenriched dicyanonitrile (2): 19/81.

Data File C:\CHEM32\...127\2013\PVL\MST\HG\MUESTRAS NOVIEMBRE\HG-SS-96-1H\_IC\_HEX-ETOH\_20.D  
Sample Name: HG-SS-96-1H

```
=====
Acq. Operator   : sc                               Seq. Line :    3
Acq. Instrument : Instrument 2                     Location  : Vial 2
Injection Date  : 11/26/2013 12:23:20 PM          Inj       :    1
                                                    Inj Volume: 5 µl

Acq. Method     : C:\CHEM32\2\METHODS\CHIRAL_IC1.M
Last changed    : 11/22/2013 4:40:02 PM by MH
Analysis Method : C:\CHEM32\2\METHODS\CHIRAL_SCREENING_IC.M
Last changed    : 12/19/2013 10:58:05 AM by sc
                (modified after loading)
Sample Info     : Chiralpack IC 250x4.6mm, 5µm
                Hex / EtOH 80:20
                1 mL/min
                25°C
                Sample: as received
=====
```

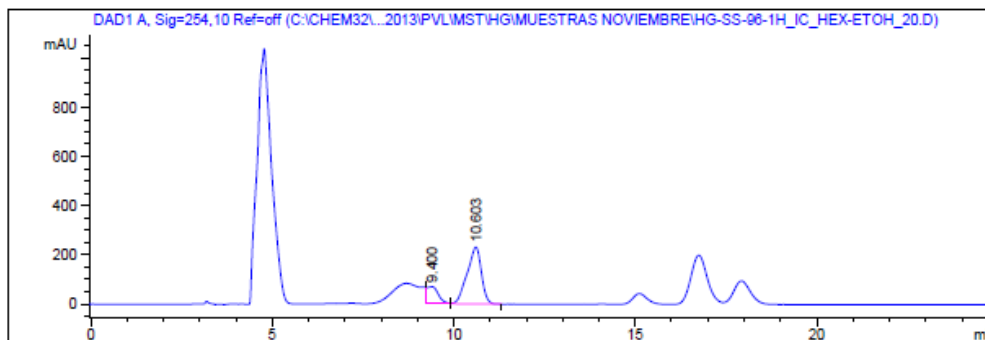

=====  
Area Percent Report  
=====

Sorted By : Signal  
Multiplier : 1.0000  
Dilution : 1.0000  
Use Multiplier & Dilution Factor with ISTDs

Signal 1: DAD1 A, Sig=254,10 Ref=off

| Peak # | RetTime [min] | Type | Width [min] | Area [mAU*s] | Height [mAU] | Area %  |
|--------|---------------|------|-------------|--------------|--------------|---------|
| 1      | 9.400         | VV   | 0.3116      | 1487.64771   | 69.54395     | 19.0320 |
| 2      | 10.603        | VB   | 0.4007      | 6328.91797   | 231.65947    | 80.9680 |

Totals : 7816.56567 301.20341

Chiral HPLC, normal phase. E.r. of the monoamide (3): 45/55; e.r. of the diamide (4): 84/16.

Data File C:\CHEM32\...13\PVL\MST\HG\MUESTRAS NOVIEMBRE\HG-SS-96-1H\_IC\_HEX-DCM-ETOH\_65-5.D  
Sample Name: HG-SS-96-1H

```
=====
Acq. Operator   : sc                               Seq. Line : 12
Acq. Instrument : Instrument 2                     Location  : Vial 2
Injection Date  : 11/26/2013 4:19:43 PM           Inj       : 1
                                                    Inj Volume: 5 µl

Acq. Method    : C:\CHEM32\2\METHODS\CHIRAL IC2.M
Last changed   : 11/22/2013 4:44:10 PM by MH
Analysis Method: C:\CHEM32\2\METHODS\CHIRAL SCREENING_IC.M
Last changed   : 12/19/2013 11:19:28 AM by sc
                (modified after loading)
Sample Info    : Chiralpack IC 250x4.6mm, 5µm
                Hex / DCM / EtOH 30:65:5
                1 mL/min
                25°C
                Sample: as received
=====
```

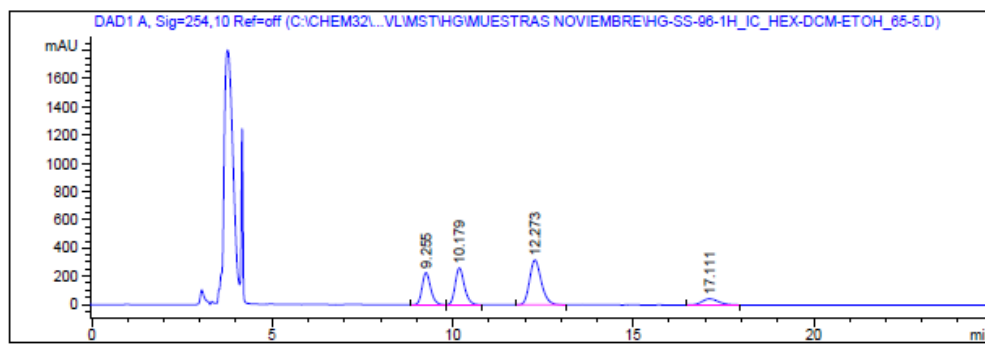

```
=====
                          Area Percent Report
=====
```

```
Sorted By      :      Signal
Multiplier     :      1.0000
Dilution       :      1.0000
Use Multiplier & Dilution Factor with ISTDs
```

Signal 1: DAD1 A, Sig=254,10 Ref=off

| Peak # | RetTime [min] | Type | Width [min] | Area [mAU*s] | Height [mAU] | Area %  |
|--------|---------------|------|-------------|--------------|--------------|---------|
| 1      | 9.255         | VV   | 0.2551      | 3819.77856   | 228.39145    | 22.1614 |
| 2      | 10.179        | VV   | 0.2731      | 4698.25830   | 262.18631    | 27.2581 |
| 3      | 12.273        | VV   | 0.3457      | 7263.83691   | 318.91525    | 42.1430 |
| 4      | 17.111        | VV   | 0.4727      | 1454.30017   | 44.33474     | 8.4375  |

```
Totals :                1.72362e4  853.82775
```

**Catalytic hydration of [1,1'-binaphthalene]-2,2'-dicarbonitrile with Pt(COD)<sub>2</sub>Cl<sub>2</sub>/AgNO<sub>3</sub>/1, reaction time 1.5h**

HPLC, reversed phase. Conversion: 72%; yield of the enantioenriched dicarbonitrile (**2**): 28%; yield of the monoamide (**3**): 27%; yield of the diamide (**4**): 45%.

Data File C:\CHEM32\...\CNER\ZX\CNIN\MUESTRAS NUEVAS\HG-SS-96\_1-5H\_ZX\_H2O-MeOH\_10-100\_15.D  
 Sample Name: HG-SS-96\_1-5h

```

=====
Acq. Operator   : LFG                               Seq. Line : 12
Acq. Instrument : Instrument 1                       Location  : Vial 12
Injection Date  : 12/10/2013 11:50:54 PM          Inj       : 1
                                                    Inj Volume: 5 µl

Acq. Method    : C:\CHEM32\1\METHODS\APCI.M
Last changed   : 12/10/2013 6:53:34 PM by LFG
Analysis Method: C:\CHEM32\1\METHODS\END.M
Last changed   : 12/19/2013 11:26:23 AM by LFG
                (modified after loading)
Sample Info    : Zorbax XDB C18 100x4.6mm, 5µm
                H2O/ MeOH 90:10
                10% up to 100% in 15', hold 5'
                APCI +
                Sample as received
=====
  
```

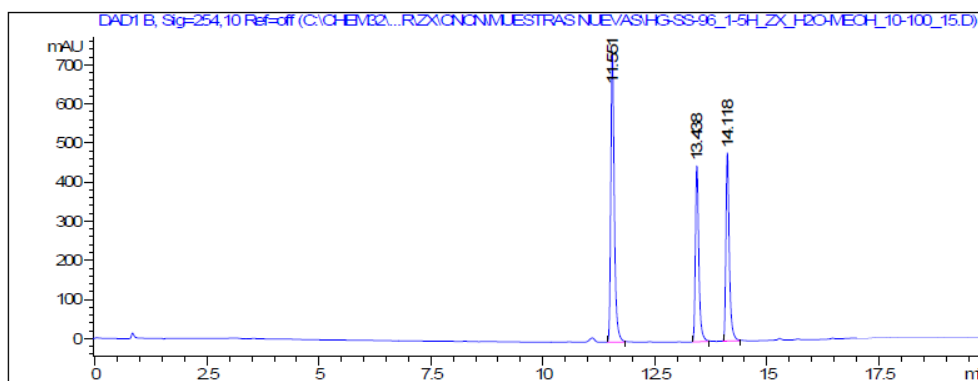

Area Percent Report

```

=====
Sorted By      : Signal
Multiplier     : 1.0000
Dilution       : 1.0000
Use Multiplier & Dilution Factor with ISIDs
=====
  
```

Signal 1: DAD1 B, Sig=254,10 Ref-off

| Peak # | RetTime [min] | Type | Width [min] | Area [mAU*s] | Height [mAU] | Area %  |
|--------|---------------|------|-------------|--------------|--------------|---------|
| 1      | 11.551        | BB   | 0.0819      | 4066.34106   | 742.43195    | 45.0288 |
| 2      | 13.438        | BB   | 0.0801      | 2401.93237   | 450.97620    | 26.5979 |
| 3      | 14.118        | BB   | 0.0798      | 2562.25586   | 483.50641    | 28.3733 |

Totals : 9030.52930 1676.91455

\*\*\* End of Report \*\*\*

Chiral HPLC, normal phase. E.r. of the enantioenriched dicarbonitrile (2): 14/86.

Data File C:\CHEM32\...7\2013\PVL\MST\HG\MUESTRAS NOVIEMBRE\HG-88-96-1-5H\_IC\_HEX-ETOH\_20.D  
 Sample Name: HG-88-96-1-5H

```

=====
Acq. Operator   : sc                               Seq. Line :    4
Acq. Instrument : Instrument 2                       Location  : Vial 3
Injection Date  : 11/26/2013 12:49:41 PM           Inj       :    1
                                                    Inj Volume: 5 µl

Acq. Method    : C:\CHEM32\2\METHODS\CHIRAL IC1.M
Last changed   : 11/22/2013 4:40:02 PM by MH
Analysis Method: C:\CHEM32\2\METHODS\CHIRAL SCREENING_IC.M
Last changed   : 12/19/2013 10:58:05 AM by sc
                (modified after loading)
Sample Info    : Chiralpack IC 250x4.6mm, 5µm
                Hex / ETOH 80:20
                1 mL/min
                25°C
                Sample: as received
  
```

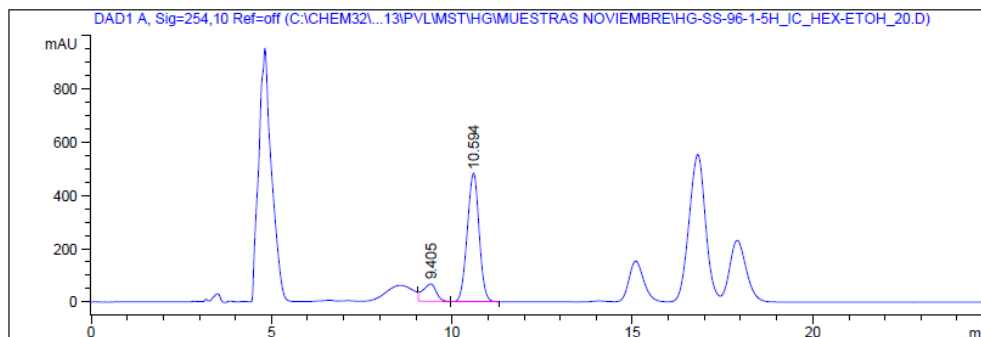

```

=====
                          Area Percent Report
=====
  
```

```

Sorted By      :      Signal
Multiplier     :      1.0000
Dilution       :      1.0000
Use Multiplier & Dilution Factor with ISTDs
  
```

Signal 1: DAD1 A, Sig=254,10 Ref=off

| Peak # | RetTime [min] | Type | Width [min] | Area [mAU*s] | Height [mAU] | Area %  |
|--------|---------------|------|-------------|--------------|--------------|---------|
| 1      | 9.405         | VV   | 0.3836      | 1753.39001   | 66.06741     | 13.6593 |
| 2      | 10.594        | VV   | 0.3573      | 1.10832e4    | 483.72638    | 86.3407 |

Totals :                                    1.28366e4    549.79379

Chiral HPLC, normal phase. E.r. of the monoamide (3): 56/44; e.r. of the diamide (4): 80/20.

Data File C:\CHEM32\...\PVL\MST\HG\MUESTRAS NOVIEMBRE\HG-SS-96-1-5H\_IC\_HEX-DCM-ETOH\_65-5.D  
Sample Name: HG-SS-96-1-5H

```
=====
Acq. Operator   : sc                               Seq. Line : 13
Acq. Instrument : Instrument 2                     Location  : Vial 3
Injection Date  : 11/26/2013 4:46:04 PM           Inj       : 1
                                                    Inj Volume: 5 µl

Acq. Method    : C:\CHEM32\2\METHODS\CHIRAL IC2.M
Last changed   : 11/22/2013 4:44:10 PM by MH
Analysis Method : C:\CHEM32\2\METHODS\CHIRAL SCREENING_IC.M
Last changed   : 12/19/2013 11:19:28 AM by sc
                (modified after loading)
Sample Info    : Chiralpack IC 250x4.6mm, 5µm
                Hex / DCM / EtOH 30:65:5
                1 mL/min
                25°C
                Sample: as received
=====
```

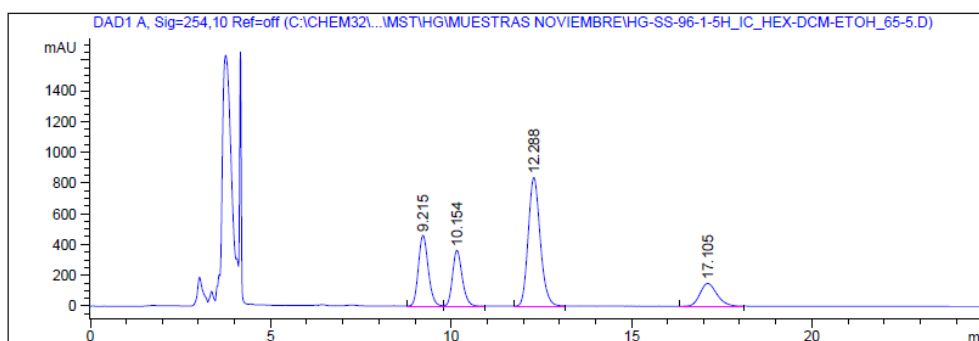

```
=====
Area Percent Report
=====
```

```
Sorted By      : Signal
Multiplier     : 1.0000
Dilution       : 1.0000
Use Multiplier & Dilution Factor with ISTDs
```

Signal 1: DAD1 A, Sig=254,10 Ref=off

| Peak # | RetTime [min] | Type | Width [min] | Area [mAU*s] | Height [mAU] | Area %  |
|--------|---------------|------|-------------|--------------|--------------|---------|
| 1      | 9.215         | VV   | 0.2951      | 8822.46289   | 461.39587    | 21.9541 |
| 2      | 10.154        | VV   | 0.2897      | 6873.66309   | 364.93018    | 17.1046 |
| 3      | 12.288        | VV   | 0.3578      | 1.95111e4    | 837.55072    | 48.5521 |
| 4      | 17.105        | VV   | 0.5011      | 4978.72705   | 149.29800    | 12.3892 |

```
Totals :                               4.01860e4  1813.17477
```

**Catalytic hydration of [1,1'-binaphthalene]-2,2'-dicarbonitrile with Pt(COD)<sub>2</sub>Cl<sub>2</sub>/AgNO<sub>3</sub>/1, reaction time 2h**

HPLC, reversed phase. Conversion: 74%; yield of the enantioenriched dicarbonitrile (**2**): 26%; yield of the monoamide (**3**): 25%; yield of the diamide (**4**): 49%.

Data File C:\CHEM32\...\CNER\ZX\QNCN\MUESTRAS NUEVAS\HG-SS-96\_2H\_ZX\_H2O-MECH\_10-100\_15\_2.D  
Sample Name: HG-SS-96\_2h

```

=====
Acq. Operator   : LFG                               Seq. Line :    2
Acq. Instrument : Instrument 1                       Location  : Vial 13
Injection Date  : 12/11/2013 10:07:26 AM          Inj       :    1
                                                    Inj Volume: 5 µl

Acq. Method    : C:\CHEM32\1\METHODS\APCI.M
Last changed   : 12/10/2013 6:53:34 PM by LFG
Analysis Method: C:\CHEM32\1\METHODS\END.M
Last changed   : 12/19/2013 11:26:23 AM by LFG
                (modified after loading)
Sample Info    : Zorbax XDB C18 100x4.6mm, 5µm
                H2O/ MeOH 90:10
                10% up to 100% in 15', hold 5'
                APCI +
                Sample as received
=====
    
```

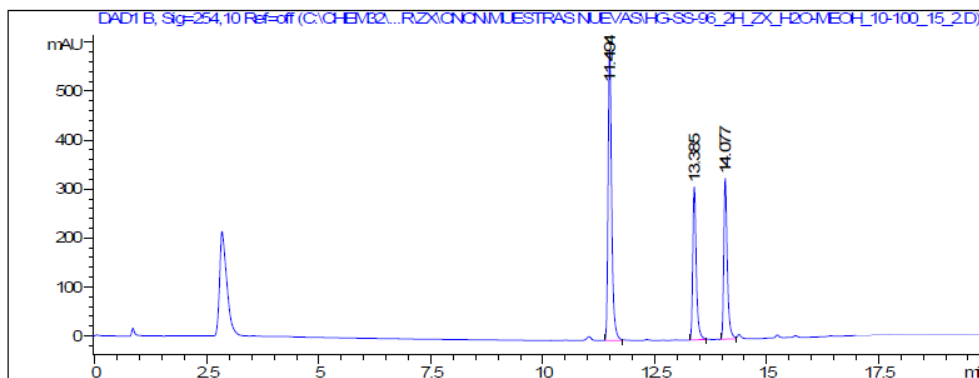

Area Percent Report

```

=====
Sorted By      :      Signal
Multiplier     :      1.0000
Dilution      :      1.0000
Use Multiplier & Dilution Factor with ISTDs
    
```

Signal 1: DAD1 B, Sig=254,10 Ref=off

| Peak # | RetTime [min] | Type | Width [min] | Area [mAU*s] | Height [mAU] | Area %  |
|--------|---------------|------|-------------|--------------|--------------|---------|
| 1      | 11.494        | BB   | 0.0849      | 3305.18970   | 594.29810    | 48.6904 |
| 2      | 13.385        | BB   | 0.0817      | 1708.14355   | 313.02380    | 25.1635 |
| 3      | 14.077        | EV   | 0.0811      | 1774.83887   | 328.23285    | 26.1460 |

Totals : 6788.17212 1235.55475

\*\*\* End of Report \*\*\*

Chiral HPLC, normal phase. E.r. of the enantioenriched dicarbonitrile (2): 14/86.

Data File C:\CHEM32\...127\2013\PVL\MST\HG\MUESTRAS NOVIEMBRE\HG-SS-96-2H\_IC\_HEX-ETOH\_20.D  
 Sample Name: HG-SS-96-2H

```

=====
Acq. Operator   : sc                               Seq. Line :    5
Acq. Instrument : Instrument 2                       Location  : Vial 4
Injection Date  : 11/26/2013 1:16:00 PM           Inj       :    1
                                                    Inj Volume: 5 µl

Acq. Method     : C:\CHEM32\2\METHODS\CHIRAL IC1.M
Last changed    : 11/22/2013 4:40:02 PM by MH
Analysis Method : C:\CHEM32\2\METHODS\CHIRAL SCREENING_IC.M
Last changed    : 12/19/2013 10:58:05 AM by sc
                  (modified after loading)

Sample Info     : Chiralpack IC 250x4.6mm, 5µm
                  Hex / EtOH 80:20
                  1 mL/min
                  25°C
                  Sample: as received
    
```

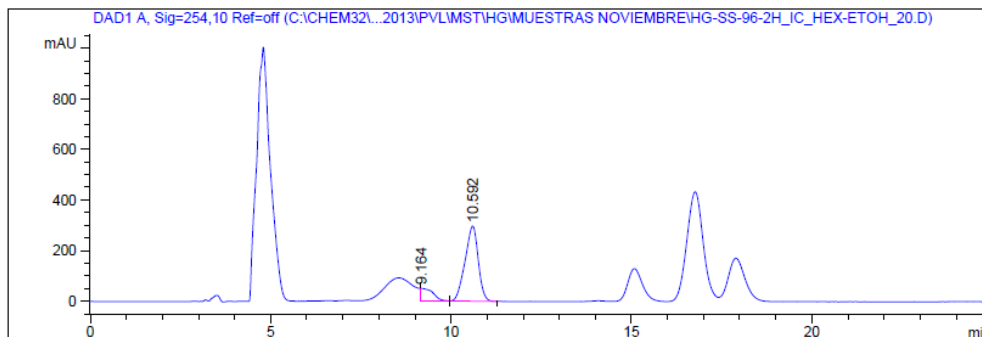

```

=====
                          Area Percent Report
=====
    
```

```

Sorted By      :      Signal
Multiplier     :      1.0000
Dilution      :      1.0000
Use Multiplier & Dilution Factor with ISTDs
    
```

Signal 1: DAD1 A, Sig=254,10 Ref=off

| Peak # | RetTime [min] | Type | Width [min] | Area [mAU*s] | Height [mAU] | Area %  |
|--------|---------------|------|-------------|--------------|--------------|---------|
| 1      | 9.164         | VV   | 0.2975      | 1232.53357   | 50.71912     | 14.0054 |
| 2      | 10.592        | VV   | 0.3887      | 7567.86230   | 297.57462    | 85.9946 |

Totals : 8800.39587 348.29374

Chiral HPLC, normal phase. E.r. of the monoamide (3): 61/39; e.r. of the diamide (4): 78/22.

Data File C:\CHEM32\...13\PVL\MST\HG\MUESTRAS NOVIEMBRE\HG-SS-96-2H\_IC\_HEX-DCM-ETOH\_65-5.D  
Sample Name: HG-SS-96-2H

```
=====
Acq. Operator   : sc                               Seq. Line : 14
Acq. Instrument : Instrument 2                     Location  : Vial 4
Injection Date  : 11/26/2013 5:12:25 PM          Inj       : 1
                                                    Inj Volume: 5 µl

Acq. Method     : C:\CHEM32\2\METHODS\CHIRAL IC2.M
Last changed    : 11/22/2013 4:44:10 PM by MH
Analysis Method : C:\CHEM32\2\METHODS\CHIRAL SCREENING_IC.M
Last changed    : 12/19/2013 11:19:28 AM by sc
                  (modified after loading)

Sample Info     : Chiralpack IC 250x4.6mm, 5µm
                  Hex / DCM / EtOH 30:65:5
                  1 mL/min
                  25°C
                  Sample: as received
=====
```

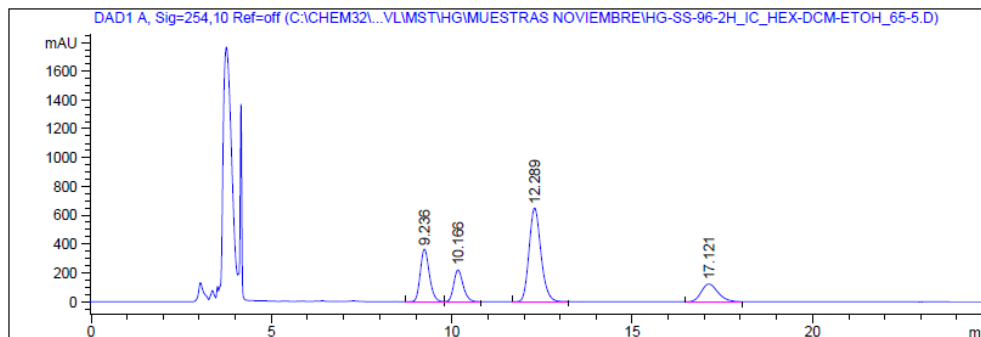

```
=====
                          Area Percent Report
=====
```

```
Sorted By      : Signal
Multiplier     : 1.0000
Dilution       : 1.0000
Use Multiplier & Dilution Factor with ISTDs
```

Signal 1: DAD1 A, Sig=254,10 Ref=off

| Peak # | RetTime [min] | Type | Width [min] | Area [mAU*s] | Height [mAU] | Area %  |
|--------|---------------|------|-------------|--------------|--------------|---------|
| 1      | 9.236         | VV   | 0.2724      | 6468.01416   | 365.65027    | 21.8669 |
| 2      | 10.166        | VV   | 0.2799      | 4067.26294   | 221.83714    | 13.7505 |
| 3      | 12.289        | VV   | 0.3545      | 1.49873e4    | 651.10242    | 50.6686 |
| 4      | 17.121        | VV   | 0.4940      | 4056.47363   | 123.88087    | 13.7140 |

```
Totals :                2.95790e4  1362.47070
```



14. Mass spectra of the [1,1'-binaphthalene]-2,2'-dicyanitrile (2), 2'-cyano-[1,1'-binaphthalene]-2-carboxamide (3) and [1,1'-binaphthalene]-2,2'-dicarboxamide (4)

Mass spectrum of [1,1'-binaphthalene]-2,2'-dicarboxamide (4) ( $M + H^+$ )

Print of window 79: MS Spectrum

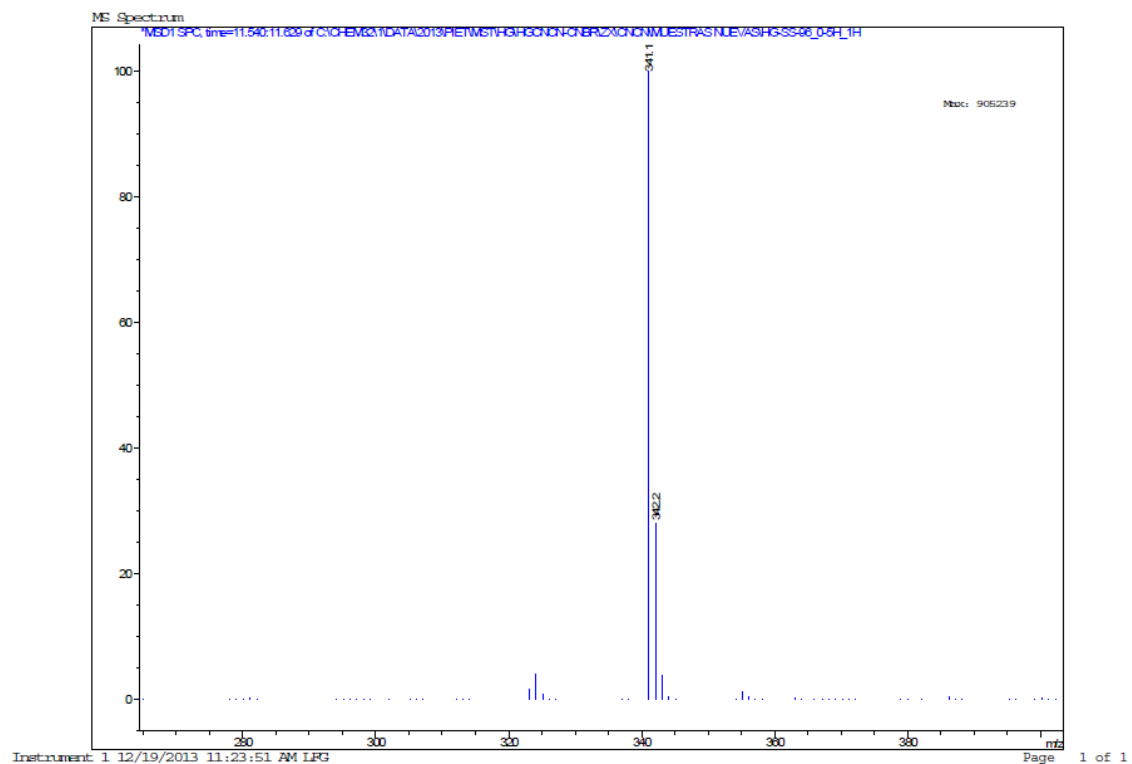

### Mass spectrum of 2'-cyano-[1,1'-binaphthalene]-2-carboxamide (**3**) ( $M + H^+$ )

Print of window 79: MS Spectrum

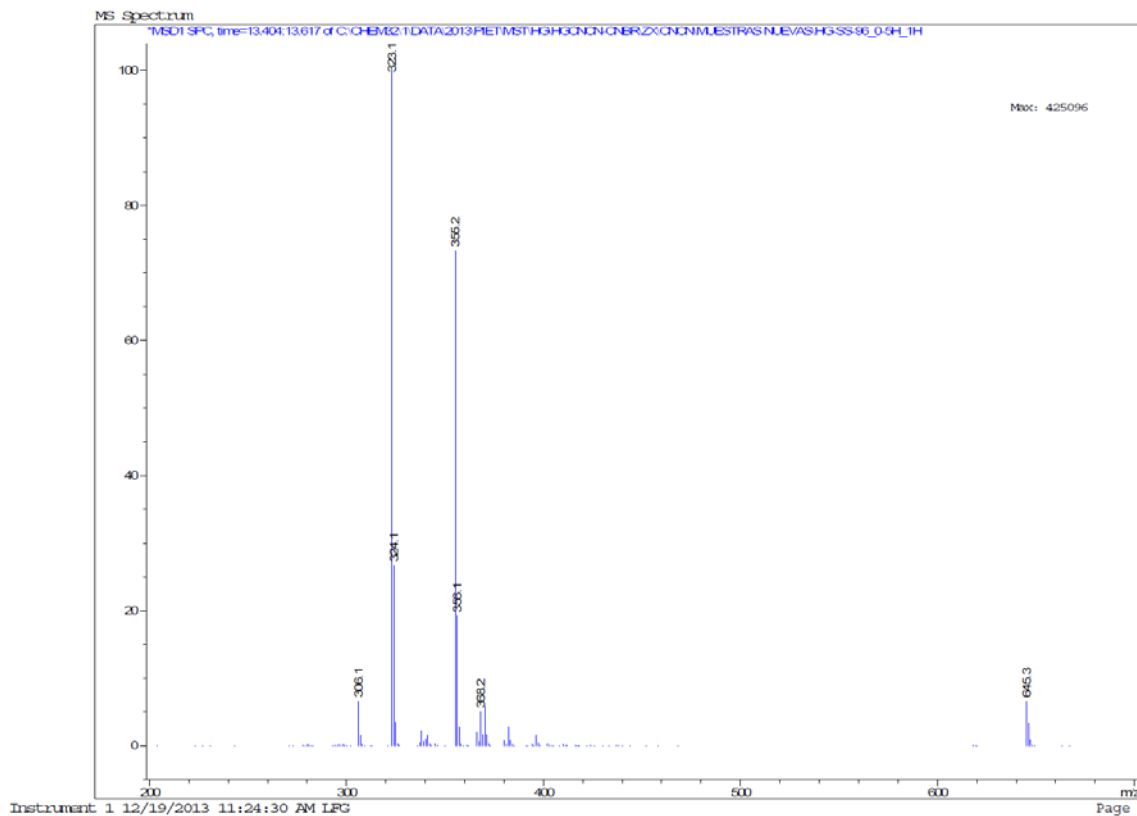

### Mass spectrum of [1,1'-binaphthalene]-2,2'-dicarbonitrile (**2**) ( $M + H^+$ )

Print of window 79: MS Spectrum

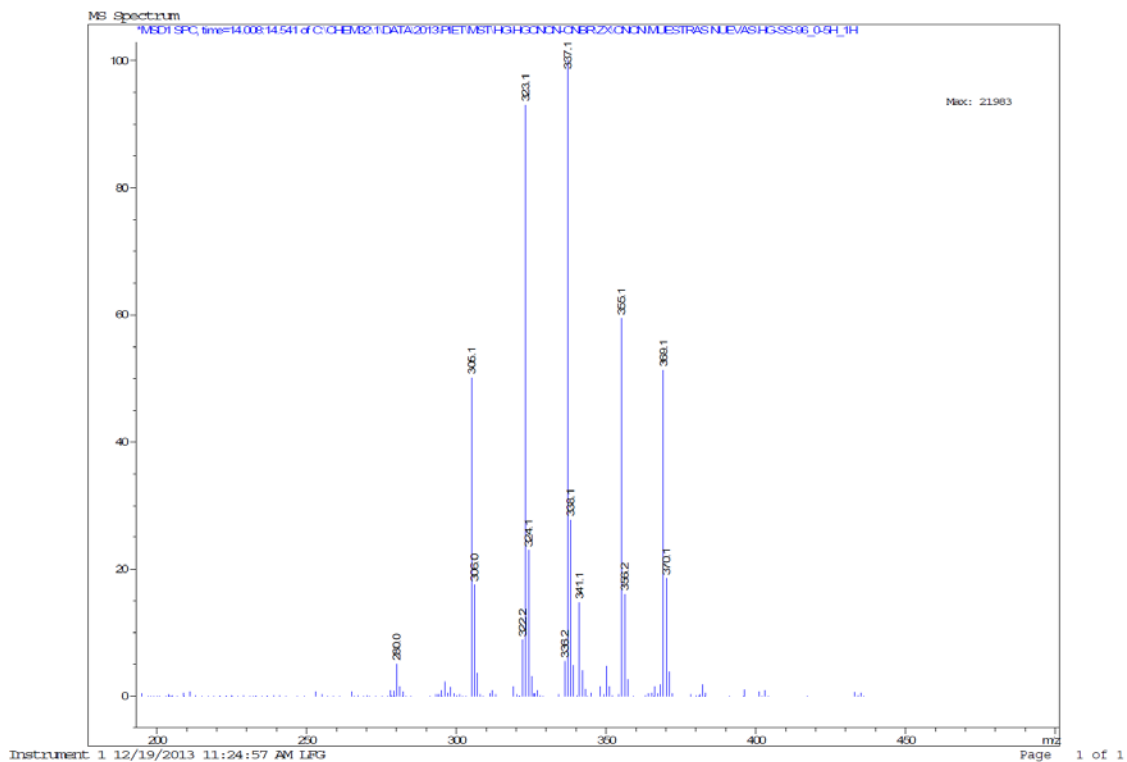

15. X-ray structures of the racemic [1,1'-binaphthalene]-2,2'-dicyanitrile, the enantioenriched [1,1'-binaphthalene]-2,2'-dicyanitrile (2), and the [1,1'-binaphthalene]-2,2'-dicarboxamide (4)

*X-ray analysis of single crystals obtained from the (rac)-[1,1'-binaphthalene]-2,2'-dicyanitrile*

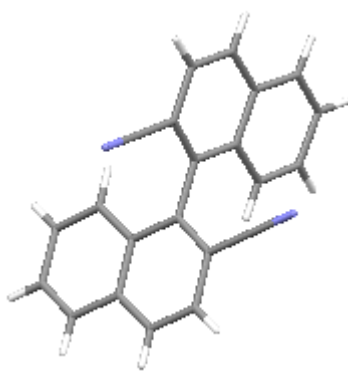

Space group P21/c

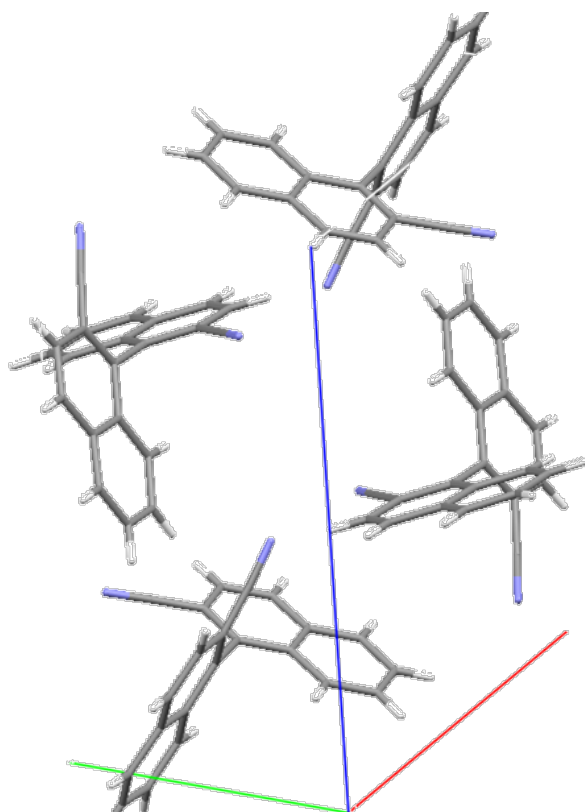

Table 1. Crystal data and structure refinement for racemic [1,1'-binaphthalene]-2,2'-dicyanitrile

|                                   |                                                |                  |
|-----------------------------------|------------------------------------------------|------------------|
| Identification code               | hg492f3-4                                      |                  |
| Empirical formula                 | C <sub>22</sub> H <sub>12</sub> N <sub>2</sub> |                  |
| Formula weight                    | 304.34                                         |                  |
| Temperature                       | 100(2) K                                       |                  |
| Wavelength                        | 0.71073 Å                                      |                  |
| Crystal system                    | Monoclinic                                     |                  |
| Space group                       | P2(1)/c                                        |                  |
| Unit cell dimensions              | a = 12.3869(6) Å                               | α = 90.00 °.     |
|                                   | b = 7.7560(4) Å                                | β = 95.514(3) °. |
|                                   | c = 16.0899(8) Å                               | γ = 90.00 °.     |
| Volume                            | 1538.65(13) Å <sup>3</sup>                     |                  |
| Z                                 | 4                                              |                  |
| Density (calculated)              | 1.314 Mg/m <sup>3</sup>                        |                  |
| Absorption coefficient            | 0.078 mm <sup>-1</sup>                         |                  |
| F(000)                            | 632                                            |                  |
| Crystal size                      | 0.40 x 0.30 x 0.10 mm <sup>3</sup>             |                  |
| Theta range for data collection   | 1.65 to 1.65 °.                                |                  |
| Index ranges                      | -20 ≤ h ≤ 20, 0 ≤ k ≤ 12, 0 ≤ l ≤ 26           |                  |
| Reflections collected             | 7412                                           |                  |
| Independent reflections           | 4819 [R(int) = 0.0000]                         |                  |
| Completeness to theta = 36.38 °   | 0.990 %                                        |                  |
| Absorption correction             | Empirical                                      |                  |
| Max. and min. transmission        | 0.9923 and 0.9695                              |                  |
| Refinement method                 | Full-matrix least-squares on F <sup>2</sup>    |                  |
| Data / restraints / parameters    | 7412 / 0 / 217                                 |                  |
| Goodness-of-fit on F <sup>2</sup> | 0.971                                          |                  |
| Final R indices [I > 2σ(I)]       | R1 = 0.0610, wR2 = 0.1588                      |                  |
| R indices (all data)              | R1 = 0.0888, wR2 = 0.1710                      |                  |
| Largest diff. peak and hole       | 0.737 and -0.284 e.Å <sup>-3</sup>             |                  |

Table 2. Bond lengths [ $\text{\AA}$ ] and angles [ $^\circ$ ] for racemic [1,1'-binaphthalene]-2,2'-dicarbonitrile

---

| Bond lengths---- |            |
|------------------|------------|
| C1-C2            | 1.3834(12) |
| C1-C10           | 1.4226(12) |
| C1-C11           | 1.4922(11) |
| N1-C21           | 1.1491(13) |
| C2-C3            | 1.4153(12) |
| C2-C21           | 1.4408(13) |
| N2-C22           | 1.1458(14) |
| C3-C4            | 1.3642(13) |
| C4-C5            | 1.4129(13) |
| C5-C6            | 1.4164(13) |
| C5-C10           | 1.4224(11) |
| C6-C7            | 1.3674(15) |
| C7-C8            | 1.4079(14) |
| C8-C9            | 1.3666(13) |
| C9-C10           | 1.4167(13) |
| C11-C12          | 1.3834(12) |
| C11-C20          | 1.4239(12) |
| C12-C13          | 1.4204(11) |
| C12-C22          | 1.4378(13) |
| C13-C14          | 1.3618(14) |
| C14-C15          | 1.4154(13) |
| C15-C16          | 1.417(13)  |
| C15-C20          | 1.4209(11) |
| C16-C17          | 1.3631(14) |
| C17-C18          | 1.4062(13) |
| C18-C19          | 1.3671(14) |
| C19-C20          | 1.4171(13) |
| Angles-----      |            |
| C2-C1-C10        | 118.99(7)  |
| C2-C1-C11        | 118.88(7)  |
| C10-C1-C11       | 122.13(8)  |
| C1-C2-C3         | 121.90(8)  |
| C1-C2-C21        | 118.61(8)  |
| C3-C2-C21        | 119.49(8)  |

|             |            |
|-------------|------------|
| C4-C3-C2    | 119.34(8)  |
| C3-C4-C5    | 120.95(8)  |
| C4-C5-C6    | 121.38(8)  |
| C4-C5-C10   | 119.75(8)  |
| C6-C5-C10   | 118.87(8)  |
| C7-C6-C5    | 120.93(8)  |
| C6-C7-C8    | 120.03(9)  |
| C9-C8-C7    | 120.68(9)  |
| C8-C9-C10   | 120.63(8)  |
| C9-C10-C5   | 118.84(8)  |
| C9-C10-C1   | 122.09(7)  |
| C5-C10-C1   | 119.07(8)  |
| C12-C11-C20 | 119.13(7)  |
| C12-C11-C1  | 120.37(8)  |
| C20-C11-C1  | 120.36(8)  |
| C11-C12-C13 | 121.70(8)  |
| C11-C12-C22 | 119.97(8)  |
| C13-C12-C22 | 118.17(8)  |
| C14-C13-C12 | 119.37(8)  |
| C13-C14-C15 | 120.92(8)  |
| C14-C15-C16 | 121.08(8)  |
| C14-C15-C20 | 119.86(8)  |
| C16-C15-C20 | 119.06(8)  |
| C17-C16-C15 | 120.79(8)  |
| C16-C17-C18 | 120.02(9)  |
| C19-C18-C17 | 120.99(9)  |
| C18-C19-C20 | 120.29(8)  |
| C19-C20-C15 | 118.81(8)  |
| C19-C20-C11 | 122.23(7)  |
| C15-C20-C11 | 118.95(8)  |
| N1-C21-C2   | 178.89(12) |
| N2-C22-C12  | 175.93(10) |

---

Table 3. Torsion angles [°] for racemic [1,1'-binaphthalene]-2,2'-dicyanitrile

---

|                 |             |
|-----------------|-------------|
| C10-C1-C2-C3    | -0.39(14)   |
| C11-C1-C2-C3    | -179.84(9)  |
| C10-C1-C2-C21   | 178.67(9)   |
| C11-C1-C2-C21   | -0.77(14)   |
| C1-C2-C3-C4     | 0.04(15)    |
| C21-C2-C3-C4    | -179.01(10) |
| C2-C3-C4-C5     | 0.30(15)    |
| C3-C4-C5-C6     | 179.80(10)  |
| C3-C4-C5-C10    | -0.29(15)   |
| C4-C5-C6-C7     | -178.93(10) |
| C10-C5-C6-C7    | 1.16(15)    |
| C5-C6-C7-C8     | -0.30(16)   |
| C6-C7-C8-C9     | -0.97(17)   |
| C7-C8-C9-C10    | 1.34(17)    |
| C8-C9-C10-C5    | -0.46(15)   |
| C8-C9-C10-C1    | 178.90(10)  |
| C4-C5-C10-C9    | 179.31(9)   |
| C6-C5-C10-C9    | -0.78(13)   |
| C4-C5-C10-C1    | -0.07(13)   |
| C6-C5-C10-C1    | 179.85(9)   |
| C2-C1-C10-C9    | -178.96(9)  |
| C11-C1-C10-C9   | 0.47(14)    |
| C2-C1-C10-C5    | 0.40(13)    |
| C11-C1-C10-C5   | 179.82(8)   |
| C2-C1-C11-C12   | -92.19(11)  |
| C10-C1-C11-C12  | 88.38(11)   |
| C2-C1-C11-C20   | 83.39(11)   |
| C10-C1-C11-C20  | -96.03(11)  |
| C20-C11-C12-C13 | -0.62(13)   |
| C1-C11-C12-C13  | 175.02(8)   |
| C20-C11-C12-C22 | -176.09(8)  |
| C1-C11-C12-C22  | -0.45(13)   |
| C11-C12-C13-C14 | -1.44(14)   |
| C22-C12-C13-C14 | 174.11(9)   |
| C12-C13-C14-C15 | 1.52(14)    |
| C13-C14-C15-C16 | -179.65(9)  |

|                 |            |
|-----------------|------------|
| C13-C14-C15-C20 | 0.42(14)   |
| C14-C15-C16-C17 | -178.36(9) |
| C20-C15-C16-C17 | 1.56(14)   |
| C15-C16-C17-C18 | -0.11(16)  |
| C16-C17-C18-C19 | -1.42(16)  |
| C17-C18-C19-C20 | 1.44(16)   |
| C18-C19-C20-C15 | 0.04(14)   |
| C18-C19-C20-C11 | -179.06(9) |
| C14-C15-C20-C19 | 178.41(9)  |
| C16-C15-C20-C19 | -1.52(13)  |
| C14-C15-C20-C11 | -2.46(13)  |
| C16-C15-C20-C11 | 177.61(8)  |
| C12-C11-C20-C19 | -178.37(9) |
| C1-C11-C20-C19  | 5.99(13)   |
| C12-C11-C20-C15 | 2.53(13)   |
| C1-C11-C20-C15  | -173.11(8) |
| C1-C2-C21-N1    | -44(6)     |
| C3-C2-C21-N1    | 135(6)     |
| C11-C12-C22-N2  | 125.4(15)  |
| C13-C12-C22-N2  | -50.2(16)  |

-----



***X-ray analysis of single crystals obtained from the enantioenriched [1,1'-binaphthalene]-2,2'-dicyanitrile (2)***

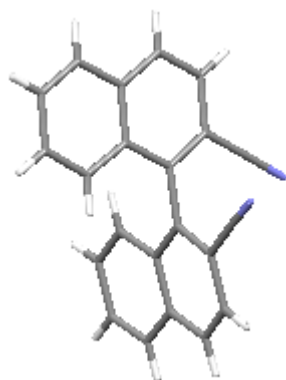

Space group P21

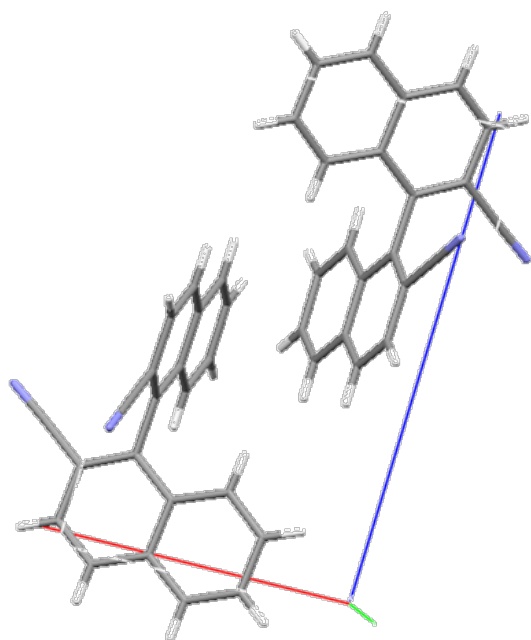

Table 1. Crystal data and structure refinement for the enantioenriched [1,1'-binaphthalene]-2,2'-dicyanitrile (**2**)

---

|                     |                                                |
|---------------------|------------------------------------------------|
| Identification code | hg513_0m                                       |
| Empirical formula   | C <sub>22</sub> H <sub>12</sub> N <sub>2</sub> |
| Formula weight      | 304.34                                         |
| Temperature         | 100(2)K                                        |

|                                   |                                             |                             |
|-----------------------------------|---------------------------------------------|-----------------------------|
| Wavelength                        | 0.71073 Å                                   |                             |
| Crystal system                    | Monoclinic                                  |                             |
| Space group                       | P2(1)                                       |                             |
| Unit cell dimensions              | a = 7.8740(8)Å                              | $\alpha = 90.00^\circ$ .    |
|                                   | b = 7.9775(8)Å                              | $\beta = 92.715(2)^\circ$ . |
|                                   | c = 12.3173(11)Å                            | $\gamma = 90.00^\circ$ .    |
| Volume                            | 772.84(13) Å <sup>3</sup>                   |                             |
| Z                                 | 2                                           |                             |
| Density (calculated)              | 1.308 Mg/m <sup>3</sup>                     |                             |
| Absorption coefficient            | 0.078 mm <sup>-1</sup>                      |                             |
| F(000)                            | 316                                         |                             |
| Crystal size                      | 0.60 x 0.40 x 0.20 mm <sup>3</sup>          |                             |
| Theta range for data collection   | 3.01 to 3.01°.                              |                             |
| Index ranges                      | -10 ≤ h ≤ 10, -9 ≤ k ≤ 9, -4 ≤ l ≤ 16       |                             |
| Reflections collected             | 2638                                        |                             |
| Independent reflections           | 2561 [R(int) = 0.0241]                      |                             |
| Completeness to theta = 28.99°    | 0.855%                                      |                             |
| Absorption correction             | Empirical                                   |                             |
| Max. and min. transmission        | 0.9847 and 0.9549                           |                             |
| Refinement method                 | Full-matrix least-squares on F <sup>2</sup> |                             |
| Data / restraints / parameters    | 2638 / 1 / 217                              |                             |
| Goodness-of-fit on F <sup>2</sup> | 1.056                                       |                             |
| Final R indices [I > 2σ(I)]       | R1 = 0.0402, wR2 = 0.1091                   |                             |
| R indices (all data)              | R1 = 0.0414, wR2 = 0.1111                   |                             |
| Largest diff. peak and hole       | 0.393 and -0.170 e.Å <sup>-3</sup>          |                             |

Table 2. Bond lengths [Å] and angles [°] for [1,1'-binaphthalene]-2,2'-dicyanide (**2**)

---

Bond lengths----

|         |            |
|---------|------------|
| C1-N1   | 1.149(2)   |
| C1-C2   | 1.446(2)   |
| C2-C11  | 1.389(2)   |
| C2-C3   | 1.4214(18) |
| C3-C4   | 1.367(2)   |
| C3-H3   | 0.95       |
| C4-C5   | 1.417(2)   |
| C4-H4   | 0.95       |
| C5-C6   | 1.423(2)   |
| C5-C10  | 1.4247(18) |
| C6-C7   | 1.369(2)   |
| C6-H6   | 0.95       |
| C7-C8   | 1.413(2)   |
| C7-H7   | 0.95       |
| C8-C9   | 1.372(2)   |
| C8-H8   | 0.95       |
| C9-C10  | 1.423(2)   |
| C9-H9   | 0.95       |
| C10-C11 | 1.4299(19) |
| C11-C12 | 1.491(18)  |
| C12-C21 | 1.382(2)   |
| C12-C13 | 1.422(2)   |
| C13-C14 | 1.423(3)   |
| C13-C18 | 1.431(18)  |
| C14-C15 | 1.371(3)   |
| C14-H14 | 0.95       |
| C15-C16 | 1.413(2)   |
| C15-H15 | 0.95       |
| C16-C17 | 1.365(3)   |
| C16-H16 | 0.95       |
| C17-C18 | 1.421(2)   |
| C17-H17 | 0.95       |
| C18-C19 | 1.417(3)   |
| C19-C20 | 1.367(3)   |
| C19-H19 | 0.95       |

|         |            |
|---------|------------|
| C20-C21 | 1.4253(19) |
| C20-H20 | 0.95       |
| C21-C22 | 1.445(2)   |
| C22-N2  | 1.144(2)   |

Angles-----

|             |            |
|-------------|------------|
| N1-C1-C2    | 178.13(17) |
| C11-C2-C3   | 121.84(13) |
| C11-C2-C1   | 119.15(13) |
| C3-C2-C1    | 118.99(13) |
| C4-C3-C2    | 119.63(14) |
| C4-C3-H3    | 120.2      |
| C2-C3-H3    | 120.2      |
| C3-C4-C5    | 120.61(13) |
| C3-C4-H4    | 119.7      |
| C5-C4-H4    | 119.7      |
| C4-C5-C6    | 121.07(13) |
| C4-C5-C10   | 120.00(13) |
| C6-C5-C10   | 118.90(14) |
| C7-C6-C5    | 120.53(14) |
| C7-C6-H6    | 119.7      |
| C5-C6-H6    | 119.7      |
| C6-C7-C8    | 120.49(14) |
| C6-C7-H7    | 119.8      |
| C8-C7-H7    | 119.8      |
| C9-C8-C7    | 120.63(15) |
| C9-C8-H8    | 119.7      |
| C7-C8-H8    | 119.7      |
| C8-C9-C10   | 120.19(13) |
| C8-C9-H9    | 119.9      |
| C10-C9-H9   | 119.9      |
| C9-C10-C5   | 119.24(13) |
| C9-C10-C11  | 121.62(12) |
| C5-C10-C11  | 119.14(13) |
| C2-C11-C10  | 118.72(13) |
| C2-C11-C12  | 120.76(13) |
| C10-C11-C12 | 120.29(13) |
| C21-C12-C13 | 119.32(13) |

|             |            |
|-------------|------------|
| C21-C12-C11 | 118.03(14) |
| C13-C12-C11 | 122.65(14) |
| C12-C13-C14 | 122.57(13) |
| C12-C13-C18 | 118.89(15) |
| C14-C13-C18 | 118.54(15) |
| C15-C14-C13 | 120.67(15) |
| C15-C14-H14 | 119.7      |
| C13-C14-H14 | 119.7      |
| C14-C15-C16 | 120.64(18) |
| C14-C15-H15 | 119.7      |
| C16-C15-H15 | 119.7      |
| C17-C16-C15 | 120.21(17) |
| C17-C16-H16 | 119.9      |
| C15-C16-H16 | 119.9      |
| C16-C17-C18 | 120.98(15) |
| C16-C17-H17 | 119.5      |
| C18-C17-H17 | 119.5      |
| C19-C18-C17 | 121.30(14) |
| C19-C18-C13 | 119.75(15) |
| C17-C18-C13 | 118.95(15) |
| C20-C19-C18 | 121.01(14) |
| C20-C19-H19 | 119.5      |
| C18-C19-H19 | 119.5      |
| C19-C20-C21 | 119.07(16) |
| C19-C20-H20 | 120.5      |
| C21-C20-H20 | 120.5      |
| C12-C21-C20 | 121.95(15) |
| C12-C21-C22 | 118.52(13) |
| C20-C21-C22 | 119.52(16) |
| N2-C22-C21  | 179.05(18) |

---

Table 3. Torsion angles [°] for [1,1'-binaphthalene]-2,2'-dicyanide (**2**)

---

|                 |             |
|-----------------|-------------|
| N1-C1-C2-C11    | -142(6)     |
| N1-C1-C2-C3     | 37(6)       |
| C11-C2-C3-C4    | 0.2(3)      |
| C1-C2-C3-C4     | -178.37(17) |
| C2-C3-C4-C5     | -2.2(3)     |
| C3-C4-C5-C6     | -176.08(17) |
| C3-C4-C5-C10    | 1.8(3)      |
| C4-C5-C6-C7     | 177.06(18)  |
| C10-C5-C6-C7    | -0.8(3)     |
| C5-C6-C7-C8     | 1.9(3)      |
| C6-C7-C8-C9     | -1.5(3)     |
| C7-C8-C9-C10    | -0.1(3)     |
| C8-C9-C10-C5    | 1.2(3)      |
| C8-C9-C10-C11   | -177.97(17) |
| C4-C5-C10-C9    | -178.67(18) |
| C6-C5-C10-C9    | -0.8(2)     |
| C4-C5-C10-C11   | 0.6(2)      |
| C6-C5-C10-C11   | 178.46(17)  |
| C3-C2-C11-C10   | 2.1(3)      |
| C1-C2-C11-C10   | -179.32(16) |
| C3-C2-C11-C12   | -172.38(16) |
| C1-C2-C11-C12   | 6.2(3)      |
| C9-C10-C11-C2   | 176.78(16)  |
| C5-C10-C11-C2   | -2.4(2)     |
| C9-C10-C11-C12  | -8.7(3)     |
| C5-C10-C11-C12  | 172.07(15)  |
| C2-C11-C12-C21  | 89.6(2)     |
| C10-C11-C12-C21 | -84.78(19)  |
| C2-C11-C12-C13  | -91.13(19)  |
| C10-C11-C12-C13 | 94.48(19)   |
| C21-C12-C13-C14 | 179.21(14)  |
| C11-C12-C13-C14 | 0.0(2)      |
| C21-C12-C13-C18 | -0.6(2)     |
| C11-C12-C13-C18 | -179.86(13) |
| C12-C13-C14-C15 | -179.76(14) |
| C18-C13-C14-C15 | 0.1(2)      |

|                 |             |
|-----------------|-------------|
| C13-C14-C15-C16 | -1.0(3)     |
| C14-C15-C16-C17 | 1.1(2)      |
| C15-C16-C17-C18 | -0.3(2)     |
| C16-C17-C18-C19 | 178.96(15)  |
| C16-C17-C18-C13 | -0.6(2)     |
| C12-C13-C18-C19 | 0.9(2)      |
| C14-C13-C18-C19 | -178.87(15) |
| C12-C13-C18-C17 | -179.44(14) |
| C14-C13-C18-C17 | 0.7(2)      |
| C17-C18-C19-C20 | 179.74(14)  |
| C13-C18-C19-C20 | -0.7(2)     |
| C18-C19-C20-C21 | 0.0(2)      |
| C13-C12-C21-C20 | 0.0(2)      |
| C11-C12-C21-C20 | 179.26(14)  |
| C13-C12-C21-C22 | -179.77(13) |
| C11-C12-C21-C22 | -0.5(2)     |
| C19-C20-C21-C12 | 0.3(2)      |
| C19-C20-C21-C22 | -179.93(16) |
| C12-C21-C22-N2  | 22(12)      |
| C20-C21-C22-N2  | -158(12)    |

-----

***X-ray analysis of single crystals obtained from the [1,1'-binaphthalene]-2,2'-dicarboxamide (4)***

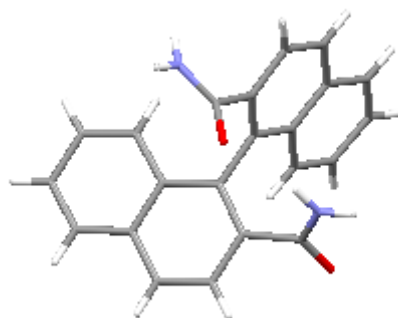

Table 1. Crystal data and structure refinement for [1,1'-binaphthalene]-2,2'-dicarboxamide (**4**)

|                                 |                                                               |                 |
|---------------------------------|---------------------------------------------------------------|-----------------|
| Identification code             | hg513frac3_0m                                                 |                 |
| Empirical formula               | C <sub>22</sub> H <sub>16</sub> N <sub>2</sub> O <sub>2</sub> |                 |
| Formula weight                  | 340.37                                                        |                 |
| Temperature                     | 100(2)K                                                       |                 |
| Wavelength                      | 0.71073 Å                                                     |                 |
| Crystal system                  | Monoclinic                                                    |                 |
| Space group                     | P2(1)/n                                                       |                 |
| Unit cell dimensions            | a = 9.3024(10)Å                                               | α = 90.00°.     |
|                                 | b = 8.3301(11)Å                                               | β = 94.100(5)°. |
|                                 | c = 21.227(2)Å                                                | γ = 90.00°.     |
| Volume                          | 1640.7(3) Å <sup>3</sup>                                      |                 |
| Z                               | 4                                                             |                 |
| Density (calculated)            | 1.378 Mg/m <sup>3</sup>                                       |                 |
| Absorption coefficient          | 0.090 mm <sup>-1</sup>                                        |                 |
| F(000)                          | 712                                                           |                 |
| Crystal size                    | ? x ? x ? mm <sup>3</sup>                                     |                 |
| Theta range for data collection | 2.33 to 23.3°.                                                |                 |
| Index ranges                    | -14 ≤ h ≤ 15, -6 ≤ k ≤ 13, -34 ≤ l ≤ 32                       |                 |
| Reflections collected           | 7548                                                          |                 |
| Independent reflections         | 4222 [R(int) = 0.0793]                                        |                 |
| Completeness to theta = 36.60°  | 0.933%                                                        |                 |
| Absorption correction           | Empirical                                                     |                 |
| Max. and min. transmission      | ? and ?                                                       |                 |
| Refinement method               | Full-matrix least-squares on F <sup>2</sup>                   |                 |
| Data / restraints / parameters  | 7548 / 0 / 235                                                |                 |



|                                      |                                       |
|--------------------------------------|---------------------------------------|
| Goodness-of-fit on $F^2$             | 0.976                                 |
| Final R indices [ $I > 2\sigma(I)$ ] | R1 = 0.0647, wR2 = 0.1531             |
| R indices (all data)                 | R1 = 0.1347, wR2 = 0.1887             |
| Largest diff. peak and hole          | 0.629 and -0.401 e. $\text{\AA}^{-3}$ |

Table 2. Bond lengths [Å] and angles [°] for [1,1'-binaphthalene]-2,2'-dicarboxamide (**4**)

---

| Bond lengths---- |            |
|------------------|------------|
| C1-O1            | 1.2307(18) |
| C1-N1            | 1.328(2)   |
| C1-C2            | 1.496(19)  |
| C2-C11           | 1.3773(18) |
| C2-C3            | 1.409(2)   |
| C3-C4            | 1.358(2)   |
| C3-H3            | 0.95       |
| C4-C5            | 1.4121(19) |
| C4-H4            | 0.95       |
| C5-C6            | 1.412(2)   |
| C5-C10           | 1.4188(19) |
| C6-C7            | 1.364(2)   |
| C6-H6            | 0.95       |
| C7-C8            | 1.402(2)   |
| C7-H7            | 0.95       |
| C8-C9            | 1.364(2)   |
| C8-H8            | 0.95       |
| C9-C10           | 1.4121(19) |
| C9-H9            | 0.95       |
| C10-C11          | 1.4263(19) |
| C11-C12          | 1.4896(19) |
| C12-C21          | 1.37(2)    |
| C12-C13          | 1.428(19)  |
| C13-C14          | 1.409(2)   |
| C13-C18          | 1.418(2)   |
| C14-C15          | 1.364(2)   |
| C14-H14          | 0.95       |
| C15-C16          | 1.406(2)   |
| C15-H15          | 0.95       |
| C16-C17          | 1.358(3)   |
| C16-H16          | 0.95       |
| C17-C18          | 1.415(2)   |
| C17-H17          | 0.95       |
| C18-C19          | 1.41(2)    |
| C19-C20          | 1.365(2)   |

|         |            |
|---------|------------|
| C19-H19 | 0.95       |
| C20-C21 | 1.414(2)   |
| C20-H20 | 0.95       |
| C21-C22 | 1.4924(19) |
| C22-O2  | 1.2371(17) |
| C22-N2  | 1.3242(18) |
| N1-H1A  | 0.88       |
| N1-H1B  | 0.88       |
| N2-H2A  | 0.88       |
| N2-H2B  | 0.88       |

Angles-----

|           |            |
|-----------|------------|
| O1-C1-N1  | 124.14(14) |
| O1-C1-C2  | 119.72(14) |
| N1-C1-C2  | 116.08(13) |
| C11-C2-C3 | 121.49(13) |
| C11-C2-C1 | 121.92(12) |
| C3-C2-C1  | 116.59(12) |
| C4-C3-C2  | 120.35(13) |
| C4-C3-H3  | 119.8      |
| C2-C3-H3  | 119.8      |
| C3-C4-C5  | 120.31(13) |
| C3-C4-H4  | 119.8      |
| C5-C4-H4  | 119.8      |
| C6-C5-C4  | 120.83(13) |
| C6-C5-C10 | 119.33(12) |
| C4-C5-C10 | 119.82(13) |
| C7-C6-C5  | 120.81(14) |
| C7-C6-H6  | 119.6      |
| C5-C6-H6  | 119.6      |
| C6-C7-C8  | 119.91(14) |
| C6-C7-H7  | 120.0      |
| C8-C7-H7  | 120.0      |
| C9-C8-C7  | 120.79(14) |
| C9-C8-H8  | 119.6      |
| C7-C8-H8  | 119.6      |
| C8-C9-C10 | 120.84(14) |
| C8-C9-H9  | 119.6      |

|             |            |
|-------------|------------|
| C10-C9-H9   | 119.6      |
| C9-C10-C5   | 118.33(13) |
| C9-C10-C11  | 122.57(13) |
| C5-C10-C11  | 119.10(12) |
| C2-C11-C10  | 118.91(12) |
| C2-C11-C12  | 120.11(12) |
| C10-C11-C12 | 120.91(11) |
| C21-C12-C13 | 119.20(12) |
| C21-C12-C11 | 121.37(12) |
| C13-C12-C11 | 119.41(13) |
| C14-C13-C18 | 118.55(13) |
| C14-C13-C12 | 122.22(13) |
| C18-C13-C12 | 119.21(14) |
| C15-C14-C13 | 120.88(15) |
| C15-C14-H14 | 119.6      |
| C13-C14-H14 | 119.6      |
| C14-C15-C16 | 120.39(16) |
| C14-C15-H15 | 119.8      |
| C16-C15-H15 | 119.8      |
| C17-C16-C15 | 120.35(14) |
| C17-C16-H16 | 119.8      |
| C15-C16-H16 | 119.8      |
| C16-C17-C18 | 120.58(14) |
| C16-C17-H17 | 119.7      |
| C18-C17-H17 | 119.7      |
| C19-C18-C17 | 121.43(13) |
| C19-C18-C13 | 119.38(13) |
| C17-C18-C13 | 119.19(15) |
| C20-C19-C18 | 120.78(13) |
| C20-C19-H19 | 119.6      |
| C18-C19-H19 | 119.6      |
| C19-C20-C21 | 119.79(15) |
| C19-C20-H20 | 120.1      |
| C21-C20-H20 | 120.1      |
| C12-C21-C20 | 121.49(13) |
| C12-C21-C22 | 120.01(12) |
| C20-C21-C22 | 118.29(14) |
| O2-C22-N2   | 123.57(13) |

|            |            |
|------------|------------|
| O2-C22-C21 | 120.26(13) |
| N2-C22-C21 | 116.13(12) |
| C1-N1-H1A  | 120.0      |
| C1-N1-H1B  | 120.0      |
| H1A-N1-H1B | 120.0      |
| C22-N2-H2A | 120.0      |
| C22-N2-H2B | 120.0      |
| H2A-N2-H2B | 120.0      |

-----

Table 3. Torsion angles [°] for [1,1'-binaphthalene]-2,2'-dicarboxamide (**4**)

---

|                 |             |
|-----------------|-------------|
| O1-C1-C2-C11    | -121.96(16) |
| N1-C1-C2-C11    | 60.62(19)   |
| O1-C1-C2-C3     | 58.05(18)   |
| N1-C1-C2-C3     | -119.37(15) |
| C11-C2-C3-C4    | -1.3(2)     |
| C1-C2-C3-C4     | 178.72(14)  |
| C2-C3-C4-C5     | 1.2(2)      |
| C3-C4-C5-C6     | 178.44(15)  |
| C3-C4-C5-C10    | 0.0(2)      |
| C4-C5-C6-C7     | -178.00(15) |
| C10-C5-C6-C7    | 0.4(2)      |
| C5-C6-C7-C8     | -0.3(2)     |
| C6-C7-C8-C9     | 0.0(2)      |
| C7-C8-C9-C10    | 0.1(2)      |
| C8-C9-C10-C5    | 0.0(2)      |
| C8-C9-C10-C11   | 179.35(15)  |
| C6-C5-C10-C9    | -0.3(2)     |
| C4-C5-C10-C9    | 178.14(14)  |
| C6-C5-C10-C11   | -179.64(14) |
| C4-C5-C10-C11   | -1.2(2)     |
| C3-C2-C11-C10   | 0.1(2)      |
| C1-C2-C11-C10   | -179.91(14) |
| C3-C2-C11-C12   | -176.96(14) |
| C1-C2-C11-C12   | 3.0(2)      |
| C9-C10-C11-C2   | -178.19(14) |
| C5-C10-C11-C2   | 1.1(2)      |
| C9-C10-C11-C12  | -1.2(2)     |
| C5-C10-C11-C12  | 178.16(13)  |
| C2-C11-C12-C21  | -107.16(16) |
| C10-C11-C12-C21 | 75.86(18)   |
| C2-C11-C12-C13  | 71.07(18)   |
| C10-C11-C12-C13 | -105.91(16) |
| C21-C12-C13-C14 | -177.66(13) |
| C11-C12-C13-C14 | 4.1(2)      |
| C21-C12-C13-C18 | 3.6(2)      |
| C11-C12-C13-C18 | -174.66(12) |

|                 |             |
|-----------------|-------------|
| C18-C13-C14-C15 | 1.7(2)      |
| C12-C13-C14-C15 | -177.01(14) |
| C13-C14-C15-C16 | 0.3(2)      |
| C14-C15-C16-C17 | -1.3(2)     |
| C15-C16-C17-C18 | 0.2(2)      |
| C16-C17-C18-C19 | -178.42(14) |
| C16-C17-C18-C13 | 1.8(2)      |
| C14-C13-C18-C19 | 177.50(13)  |
| C12-C13-C18-C19 | -3.7(2)     |
| C14-C13-C18-C17 | -2.8(2)     |
| C12-C13-C18-C17 | 176.01(13)  |
| C17-C18-C19-C20 | -178.90(14) |
| C13-C18-C19-C20 | 0.8(2)      |
| C18-C19-C20-C21 | 2.2(2)      |
| C13-C12-C21-C20 | -0.6(2)     |
| C11-C12-C21-C20 | 177.61(13)  |
| C13-C12-C21-C22 | -175.23(12) |
| C11-C12-C21-C22 | 3.0(2)      |
| C19-C20-C21-C12 | -2.3(2)     |
| C19-C20-C21-C22 | 172.39(13)  |
| C12-C21-C22-O2  | 60.1(2)     |
| C20-C21-C22-O2  | -114.69(16) |
| C12-C21-C22-N2  | -122.11(15) |
| C20-C21-C22-N2  | 63.11(19)   |

-----

---

<sup>i</sup> T. Schareina, A. Zapf, W. Mägerlein, N. Müller, M. Beller *Chem. Eur. J.*, **2007**, *13*, 6249-6254.

<sup>ii</sup> P. M. Castro, H. Gulyás, J. Benet-Buchholz, C. Bo, Z. Freixa, P. W. N. M. van Leeuwen *Catal. Sci. Technol.*, **2011**, *1*, 401-407.

<sup>iii</sup> Carcinogenic solvent. It should only be used in a well-ventiled hood, with appropriate protection and great care.
